# Supplementary material for: Identification of HIV-1 Tat-Associated Proteins Contributing to HIV-1 Transcription and Latency
Source: Viruses. 2017 Apr 1;9(4):67. doi: 10.3390/v9040067 (PMC5408673; doi:10.3390/v9040067)
Supplement: Supplementary file 1 [file viruses-09-00067-s001.tgz]

Archive with 11 entries (8 files):
- Supplementary revised/__MACOSX/
- Supplementary revised/__MACOSX/SupplementaryMaterials/
- Supplementary revised/__MACOSX/SupplementaryMaterials/._SupplementaryFigures.pdf
- Supplementary revised/__MACOSX/SupplementaryMaterials/._TableS1.xlsx
- Supplementary revised/__MACOSX/SupplementaryMaterials/._TableS2.xlsx
- Supplementary revised/__MACOSX/SupplementaryMaterials/._TableS3.docx
- Supplementary revised/SupplementaryMaterials/
- Supplementary revised/SupplementaryMaterials/SupplementaryFigures.pdf
- Supplementary revised/SupplementaryMaterials/TableS1.xlsx
- Supplementary revised/SupplementaryMaterials/TableS2.xlsx
- Supplementary revised/SupplementaryMaterials/TableS3.docx
