# Supplementary material for: Identification of HIV-1 Tat-Associated Proteins Contributing to HIV-1 Transcription and Latency
Source: Viruses. 2017 Apr 1;9(4):67. doi: 10.3390/v9040067 (PMC5408673; doi:10.3390/v9040067)
Supplement: Supplementary file 1 [file viruses-09-00067-s001.tgz › Supplementary revised/SupplementaryMaterials/TableS1.xlsx]

## Sheet: Sheet1
	TAPs identified from PLATO		Gautier et al (2009), Retrovirology, 6:47.		Jäger et al (2011), Nature, 481(7381):371-5.		HIV-1 Human Interaction Database (NCBI)		Tacheny et al (2012), Nucleic Acids Res, 40(21):e168.		TAPs (> 2 screens)		GO terms for 566 & 34 proteins (p < 0.001)
	ACP1		AATF		AFF1		ACAN		ALYREF		AFF4
	ANKRD16		ACIN1		AFF4		AFF4		APEX1		BTAF1		566 proteins
	APBB1IP		ACTL6A		AHCYL1		ANXA5		ARNTL2		C1QBP		GO-ID	p-value	corr p-value	x	n	X	N	Description	Genes in test set
	ATF6B		ADAR		AHCYL2		APP		BASP1		CCNT1		3676	2.88e-88	1.9e-85	320	3288	530	15461	nucleic acid binding	APP|KIAA0020|HNRNPU|HNRNPR|CTIP2|PNN|N-PAC|MYC|SAP130|TRIM24|HIST3H2BB|STRA13|SOX4|SRRM2|DDX18|ELYS|RECQL|SND1|ZNF16|LAP2|SARNP|SUB1|CLOCK|HIST2H3C|TP53|HIST1H3J|PRKDC|MINT|GATA3|RNPC2|HTATSF1|HIST1H3A|PCBP1|SNF2H|PCBP2|HIST1H3F|HIST1H3G|HIST1H3H|HIST1H3I|HIST1H3B|ZBTB7A|HIST1H3C|HIST1H3D|HIST1H3E|ASCC3L1|EGR1|CREBBP|JUN|ZNF384|XRCC6|H3F3B|BCL11B|HIST1H4K|HIST1H4L|XRCC5|H3F3A|SETDB2|NR2F1|EIF2AK2…
	BCL10		AML1		CCNT1		ARID1A		BHLHE40		CDK9		3677	3.92e-80	1.3e-77	263	2363	530	15461	DNA binding	APP|HNRNPU|PNN|N-PAC|MYC|TRIM24|HIST3H2BB|STRA13|SOX4|ELYS|RECQL|ZNF16|LAP2|SARNP|SUB1|CLOCK|HIST2H3C|TP53|HIST1H3J|PRKDC|MINT|GATA3|HIST1H3A|PCBP1|SNF2H|PCBP2|HIST1H3F|HIST1H3G|HIST1H3H|HIST1H3I|HIST1H3B|ZBTB7A|HIST1H3C|HIST1H3D|HIST1H3E|EGR1|CREBBP|JUN|ZNF384|XRCC6|H3F3B|HIST1H4K|HIST1H4L|XRCC5|H3F3A|SETDB2|NR2F1|NFATC2|NR2F2|PRG3|SMARCA2|PBX1|SMARCA3|CDC2|SMARCA4|HIST1H4A|HNRNPK|HIST1H4B|H2AFY…
	BIRC5		ANAPC7		CDK9		ARID2		CEBPB		CEBPB		5515	2.1e-40	4.62e-38	424	8148	530	15461	protein binding	TRRAP|HNRNPU|HNRNPR|SMC3|PHB2|SMC4|SMC2|MYC|STRA13|CSNK2A2|FRS2|GTPBP4|MED6|SND1|NUP93|DYNC1LI1|SARNP|NUP98|CLOCK|NUP205|PRKDC|MINT|BCL10|GATA3|RNPC2|GRIN2A|RNF213|NUP85|SNF2H|ZBTB7A|ASCC3L1|MYH7B|CREBBP|JUN|ZNF384|PLK1|NR2F1|EIF2AK2|NFATC2|NR2F2|GRIN2C|GRIN2B|PBX1|CDC2|GRIN2D|HNRNPL|HNRNPK|FXYD4|REL|GMEB1|SETD7|SLC6A3|GLI2|TUBA1C|MED14|TUBA1B|TUBA1A|NELFB|EMD|BRD3|FGFBP1|MYST2|ACTL6A|ANXA5|SIRT1…
	C19orf23		ASCC3L1		DCAF16		BCL11B		CLOCK		DDX5		30528	6.65e-40	1.1e-37	158	1510	530	15461	transcription regulator activity	TCERG1|TRRAP|BRG1|GTF2B|YEATS4|PHB2|ETS1|YY1|KAT5|BASP1|MYC|SAP130|TRIM24|EP300|STRA13|SOX4|GTF2I|ELYS|SUPT16H|THOC1|MITF|ILF2|MED6|SND1|SAP30|ILF3|CCNE1|SUB1|CLOCK|TP53|KHDRBS1|DDX5|MAX|MINT|BCL10|GATA3|PHB|HTATSF1|BAF250|SNF2H|CYTL1|DMAP1|ZBTB7A|ESRRA|EGR1|CREBBP|JUN|ZNF384|XRCC6|POU2F1|CBX4|WSTF|NR2F1|NFATC2|NR2F2|SMARCA2|PBX1|NFKB1|SMARCA3|NFKB2|SMARCA4|CDK7|SNW1|SP1|FUBP1|SP3|BHLHE40|REL|TAF…
	C1orf109		AUF1		FAM98A		BRCA1		CREB1		ERCC2		16563	2.46e-38	3.25e-36	82	431	530	15461	transcription activator activity	TCERG1|GMEB1|THRA|TRRAP|BRG1|CHD8|BRCA1|GLI2|AML1|YY1|MED14|KAT5|MYC|SAP130|TRIM24|EP300|GABPA|RBM14|MITF|EDF1|ARID1A|MED6|KAT2B|TAF6L|KAT2A|ILF3|ELF2|CCNE1|SUB1|TP53|AUF1|CEBPB|HDAC2|MAX|HDAC1|MINT|TAF9|CXXC1|RNF6|BCL10|PHB|RELA|BAF250|MNT|RXRA|CAND1|SNF2H|BAF170|TBX20|CYTL1|MTA2|EGR1|CREBBP|JUN|ZNF384|XRCC6|NPM1|POU2F1|TAF12|TAF10|TAF11|NR2F1|NFATC2|NR2F2|SMARCA2|USF2|SMARCA3|USF1|NFKB2|SMARCA4…
	CABP7		BAF170		FBN2		BTAF1		DDX5		HDAC1		8134	2.96e-31	3.26e-29	81	522	530	15461	transcription factor binding	TCERG1|GMEB1|THRA|TRRAP|GTF2B|BRCA1|HMGB1|ETS1|AML1|YY1|MED14|KAT5|SIN3A|BASP1|SAP130|TRIM24|EP300|GABPA|TGIF1|RBM14|TBP|PARP1|EDF1|SIRT1|MED6|SND1|SAP30|KAT2B|TAF6L|KAT2A|CREB1|MDFIC|CCNE1|SUB1|TP53|CEBPB|HDAC2|DDX5|LRP1|PRKDC|MAX|HDAC1|MINT|TAF9|BCL10|GATA3|RELA|RELB|PURA|MNT|RXRA|BAF170|MXI1|SAP18|DMAP1|CREBBP|JUN|NPM1|CBX4|TAF12|WSTF|TAF10|TAF11|NR2F1|NR2F2|SMARCA2|USF2|PBX1|USF1|NFKB2|NFKBIA…
	CALML5		BAF180		FBXO3		C1QBP		EDF1		HIST1H2BD		5488	4.04e-30	3.82e-28	512	12390	530	15461	binding	TRRAP|KIAA0020|HNRNPU|HNRNPR|SMC3|PHB2|SMC4|SMC2|MYC|HIST3H2BB|STRA13|DDX18|CSNK2A2|FRS2|GTPBP4|MED6|SND1|ZNF16|NUP93|DYNC1LI1|MYL6|SARNP|NUP98|CLOCK|NUP205|PRKDC|MINT|BCL10|GATA3|RNPC2|GRIN2A|RNF213|NUP85|SNF2H|ZBTB7A|ASCC3L1|MYH7B|CREBBP|JUN|ZNF384|H3F3B|H3F3A|PLK1|NR2F1|EIF2AK2|LARP7|NFATC2|NR2F2|GRIN2C|GRIN2B|PBX1|CDC2|GRIN2D|HNRNPL|HNRNPK|FXYD4|H2AFY2|REL|FARSA|EFCAB4A|HIST2H2AA3|GMEB1|SETD7…
	CAMK1D		BAF250		HNRNPH3		CCNB1		ELF2		HIST1H2BN		3712	2.34e-22	1.93e-20	57	363	530	15461	transcription cofactor activity	TCERG1|GMEB1|TRRAP|BRCA1|YY1|MED14|KAT5|SIN3A|BASP1|SAP130|TRIM24|EP300|GABPA|TGIF1|RBM14|EDF1|SIRT1|MED6|SND1|SAP30|KAT2B|TAF6L|KAT2A|CREB1|CCNE1|SUB1|DDX5|LRP1|MAX|MINT|TAF9|BCL10|RELB|MNT|RXRA|BAF170|MXI1|SAP18|DMAP1|CREBBP|JUN|NPM1|CBX4|TAF12|TAF10|TAF11|NR2F1|NR2F2|SMARCA2|NFKB2|CDK7|APEX1|TAF7|TAF4|TRIM32|RAN|TAF1
	CETN1		BRD2		LARP7		CCNE1		ESRRA		HIST1H3H		3713	2.72e-20	2e-18	42	216	530	15461	transcription coactivator activity	TCERG1|GMEB1|TRRAP|MAX|TAF9|BCL10|BRCA1|YY1|MED14|MNT|RXRA|KAT5|BAF170|SAP130|TRIM24|EP300|GABPA|CREBBP|JUN|NPM1|RBM14|TAF12|TAF10|TAF11|NR2F1|EDF1|NR2F2|SMARCA2|MED6|NFKB2|KAT2B|TAF6L|KAT2A|CDK7|CCNE1|APEX1|SUB1|TAF7|TAF4|TRIM32|RAN|TAF1
	CHCHD5		BRD3		MEPCE		CCNH		FUBP1		KPNA2		3702	1.21e-18	8.01e-17	42	238	530	15461	RNA polymerase II transcription factor activity	TCERG1|CEBPB|NFIX|GTF2B|MLLT1|HTATSF1|MLL|ETS1|RELA|PURA|MED14|RXRA|SNF2H|GABPA|GTF2I|JUN|RBM14|TBP|TAF12|TAF13|TAF10|TAF11|NR2F1|GTF2H1|MITF|NR2F2|GTF2H3|GTF2H4|ILF2|USF2|MED6|SMARCA3|USF1|TAF6L|MEIS1|KLF5|TFAP4|CREB1|SP1|TAF7|TAF6|TAF4
	CSNK2A2		BRG1		MLLT1		CCNT1		GABPA		KPNB1		4386	4.79e-16	2.88e-14	30	140	530	15461	helicase activity	DDX5|DDX3X|MCM7|DDX3|DDX24|BRG1|CETN1|DDX1|CHD8|DDX21|RHA|CHD4|BTAF1|RUVBL2|SNF2H|RUVBL1|DHX15|EP400|DDX19|ASCC3L1|DDX18|XRCC6|XRCC5|RECQL|SMARCA2|SMARCA3|SMARCA4|ERCC3|ERCC2|MCM6
	CYP2S1		BRIX		NAP1L4		CCNT2		GAPDH		LMNA		3723	1.4e-15	7.7e-14	71	733	530	15461	RNA binding	NOP5/NOP58|DDX3X|CCNT1|THRA|KIAA0020|HNRNPU|HNRNPR|ADAR|BRCA1|YBX1|SRP14|CROP|FBL|HNRPM|XPO1|DGCR8|HNRPF|HNRPH|SRRM2|DDX18|RBM14|DIMT1|NSUN2|THOC1|ILF2|PSMA6|ILF3|SFPQ|SARNP|NCL|ZNF638|MATR3|HNRNPH3|PABPC1|KHDRBS1|AUF1|NOL1|DDX5|LRP1|DDX3|DDX24|STAU2|C23|MINT|DDX1|DDX21|RHA|RNPC2|HTATSF1|PRPF8|PCBP1|PPP1R8|PCBP2|DDX19|NPM1|MYEF2|TAF15|MBD2|NOL5A|EIF2AK2|LARP7|CDC5L|TARBP2|HNRNPL|CDK9|HNRNPK|PRKRA…
	CYTH4		BTAF1		NPM3		CCR2		GTF2I		NFKB1		3700	1.87e-15	9.49e-14	83	951	530	15461	transcription factor activity	GMEB1|THRA|YEATS4|HMGB1|YBX1|ZNFN1A1|AATF|MLL|ETS1|AFF4|AFF1|GLI2|AML1|YY1|SIN3A|MYC|STRA13|SOX4|GABPA|GTF2I|TGIF1|ELYS|MYST2|TBP|TFE3|TFEB|MITF|KLF16|CREB1|ELF2|IRF1|CLOCK|TP53|CEBPB|NFIX|ATF6B|MAX|HDAC1|MINT|GATA3|ARNTL2|RELA|RELB|PURA|MNT|BTAF1|RXRA|MTA1|TBX20|MTA2|MTA3|ESRRA|EGR1|CREBBP|JUN|POU2F1|TAF13|MGA|NR2F1|NFATC2|NR2F2|GTF2H2|GTF2H3|GTF2H4|USF2|PBX1|NFKB1|USF1|GATAD2A|NFKB2|MEIS1|KLF5|…
	CYTL1		BZW2		PPM1G		CCR3		HDAC1		NFKB2		10843	7.25e-15	3.43e-13	26	113	530	15461	promoter binding	THRA|MAX|TAF9|ZNFN1A1|RELA|GLI2|YY1|BASP1|MYC|EP300|GABPA|JUN|XRCC6|TBP|XRCC5|TFE3|TFEB|NR2F2|NFKB1|TFAP4|SP1|TAF7|TAF5|TP53|TAF2|TP73
	DDX26B		C1orf149		SIRT1		CD38		HIST1H1B		NPM1		44212	1.77e-14	7.8e-13	26	117	530	15461	DNA regulatory region binding	THRA|MAX|TAF9|ZNFN1A1|RELA|GLI2|YY1|BASP1|MYC|EP300|GABPA|JUN|XRCC6|TBP|XRCC5|TFE3|TFEB|NR2F2|NFKB1|TFAP4|SP1|TAF7|TAF5|TP53|TAF2|TP73
	DGCR8		c1qbp		SRRM2		CDK2		HMGB1		PPM1G		43565	6.93e-14	2.86e-12	62	634	530	15461	sequence-specific DNA binding	THRA|ZNFN1A1|MLL|ETS1|GLI2|YY1|BASP1|MYC|TRIM24|EP300|GABPA|TGIF1|TBP|TFE3|TFEB|MITF|EDF1|CREB1|ELF2|NCL|IRF1|TP53|AUF1|CEBPB|HDAC2|NFIX|ATF6B|MAX|C23|TAF9|CXXC1|GATA3|RELA|ORC5|ORC4|PURA|MTA1|MTA2|MTA3|ESRRA|EGR1|JUN|XRCC6|POU2F1|XRCC5|MBD2|NR2F1|NFATC2|NR2F2|USF2|PBX1|NFKB1|USF1|GATAD2A|MEIS1|TFAP4|SP1|TAF7|TAF5|TAF2|TP73|TAF1
	DULLARD		C23		UBE2O		CDK7		HNRNPK		PPP1CC		16564	3.08e-13	1.2e-11	42	335	530	15461	transcription repressor activity	KHDRBS1|HDAC2|LRP1|THRA|HDAC1|MINT|CHD8|PHB|YBX1|ZNFN1A1|PHB2|RELA|RELB|YY1|MNT|KAT5|SIN3A|BASP1|MXI1|TRIM24|SAP18|STRA13|DMAP1|MTA2|ZBTB7A|TGIF1|JUN|POU2F1|CBX4|MBD2|NR2F2|SIRT1|GATAD2A|SAP30|ILF3|SNW1|TFAP4|ELF2|APEX1|SP3|BHLHE40|TAF7
	EFCAB4A		CAND1		USP11		CDK9		HNRNPL		PRKDC		4298	5.17e-13	1.8e-11	12	21	530	15461	threonine-type endopeptidase activity	PSMB6|PSMA6|PSMB7|PSMA4|PSMB5|PSMB2|PSMA2|PSMB3|PSMB1|PSMA7|PSMB8|PSMB10
	EFR3B		CAP-H		ZFP91		CEBPB		HNRNPR		RBBP4		70003	5.17e-13	1.8e-11	12	21	530	15461	threonine-type peptidase activity	PSMB6|PSMA6|PSMB7|PSMA4|PSMB5|PSMB2|PSMA2|PSMB3|PSMB1|PSMA7|PSMB8|PSMB10
	EIF3K		CBX4		ZNF579		CREBBP		HNRNPU		RBBP7		8094	3.42e-12	1.13e-10	16	49	530	15461	DNA-dependent ATPase activity	TOP2A|XRCC6|RFC1|BRG1|RFC2|XRCC5|CHD8|RECQL|RHA|CHD4|SMARCA2|SMARCA4|CDK7|ERCC3|RUVBL2|ERCC2
	FAM86A		CCNB2				CTDP1		KHDRBS1		RBM14		3682	6.95e-12	2.19e-10	28	173	530	15461	chromatin binding	TOP2A|CHD8|SF3B155|CHD4|MLL|GLI2|KAT5|SIN3A|H2AFJ|SNF2H|BAF170|TRIM24|MBD3|SUZ12|CREBBP|CBX4|H2AFY|WSTF|ACTL6A|MBD2|MITF|CDC2|KAT2A|BAF180|SP3|TOP1|TP53|RAN
	FARSA		CDC2				CXCR4		KLF16		RELA		16251	4.69e-11	1.41e-09	15	49	530	15461	general RNA polymerase II transcription factor activity	RBM14|TBP|TAF12|TAF13|GTF2B|TAF10|TAF11|GTF2H1|GTF2H3|MED6|MED14|TAF7|TAF6|TAF4|GTF2I
	FRS2		CDC5L				DDX1		KLF5		SAP18		17111	1.23e-10	3.52e-09	59	698	530	15461	nucleoside-triphosphatase activity	TOP2A|DDX3X|MCM7|BRG1|CETN1|CHD8|CHD4|SMC3|TUBB8|TUBA1C|TUBA1B|TUBB6|TUBA1A|TUBB3|RUVBL2|RUVBL1|TUBB1|DHX15|DDX18|RFC1|RFC2|RECQL|KIF22|GTPBP4|TUBA4A|TUFM|EEF1A1|DYNC1LI1|MYL6|TUBB2A|MCM3|MYH9|MCM6|DDX5|DDX3|DDX24|DDX1|DDX21|RHA|ORC4|RNF213|BTAF1|TUBA3C|SNF2H|EP400|DDX19|ASCC3L1|MYH7B|XRCC6|XRCC5|SMARCA2|SMARCA3|SMARCA4|CDK7|ERCC3|ERCC2|ACIN1|RAN|TUBA8
	FXYD4		CDCA7				DDX3X		LMNA		SIN3A		16462	5.4e-10	1.49e-08	59	725	530	15461	pyrophosphatase activity	TOP2A|DDX3X|MCM7|BRG1|CETN1|CHD8|CHD4|SMC3|TUBB8|TUBA1C|TUBA1B|TUBB6|TUBA1A|TUBB3|RUVBL2|RUVBL1|TUBB1|DHX15|DDX18|RFC1|RFC2|RECQL|KIF22|GTPBP4|TUBA4A|TUFM|EEF1A1|DYNC1LI1|MYL6|TUBB2A|MCM3|MYH9|MCM6|DDX5|DDX3|DDX24|DDX1|DDX21|RHA|ORC4|RNF213|BTAF1|TUBA3C|SNF2H|EP400|DDX19|ASCC3L1|MYH7B|XRCC6|XRCC5|SMARCA2|SMARCA3|SMARCA4|CDK7|ERCC3|ERCC2|ACIN1|RAN|TUBA8
	GATA3		CDCA7L				DPP4		MAX		SIRT1		16818	6.33e-10	1.67e-08	59	728	530	15461	hydrolase activity, acting on acid anhydrides, in phosphorus-containing anhydrides	TOP2A|DDX3X|MCM7|BRG1|CETN1|CHD8|CHD4|SMC3|TUBB8|TUBA1C|TUBA1B|TUBB6|TUBA1A|TUBB3|RUVBL2|RUVBL1|TUBB1|DHX15|DDX18|RFC1|RFC2|RECQL|KIF22|GTPBP4|TUBA4A|TUFM|EEF1A1|DYNC1LI1|MYL6|TUBB2A|MCM3|MYH9|MCM6|DDX5|DDX3|DDX24|DDX1|DDX21|RHA|ORC4|RNF213|BTAF1|TUBA3C|SNF2H|EP400|DDX19|ASCC3L1|MYH7B|XRCC6|XRCC5|SMARCA2|SMARCA3|SMARCA4|CDK7|ERCC3|ERCC2|ACIN1|RAN|TUBA8
	GEMIN8		CHD4				EGR1		MEIS1		SP3		43566	7.01e-10	1.78e-08	23	144	530	15461	structure-specific DNA binding	EGR1|JUN|XRCC6|MCM7|XRCC5|MINT|RECQL|HMGB1|YBX1|MLH1|USF2|USF1|PURA|RXRA|CREB1|SP1|ZNF638|SUB1|PCBP1|FUBP1|SP3|MCM6|TP53
	GMEB1		CHD8				EIF2AK2		MGA		SUB1		16817	7.81e-10	1.91e-08	59	732	530	15461	hydrolase activity, acting on acid anhydrides	TOP2A|DDX3X|MCM7|BRG1|CETN1|CHD8|CHD4|SMC3|TUBB8|TUBA1C|TUBA1B|TUBB6|TUBA1A|TUBB3|RUVBL2|RUVBL1|TUBB1|DHX15|DDX18|RFC1|RFC2|RECQL|KIF22|GTPBP4|TUBA4A|TUFM|EEF1A1|DYNC1LI1|MYL6|TUBB2A|MCM3|MYH9|MCM6|DDX5|DDX3|DDX24|DDX1|DDX21|RHA|ORC4|RNF213|BTAF1|TUBA3C|SNF2H|EP400|DDX19|ASCC3L1|MYH7B|XRCC6|XRCC5|SMARCA2|SMARCA3|SMARCA4|CDK7|ERCC3|ERCC2|ACIN1|RAN|TUBA8
	HIST1H2BD		CNAP1				EP300		MITF		TAF15		70035	1.51e-09	3.45e-08	19	102	530	15461	purine NTP-dependent helicase activity	ASCC3L1|DDX18|XRCC6|DDX5|DDX3X|DDX3|DDX24|XRCC5|CETN1|DDX1|RECQL|DDX21|RHA|CHD4|ERCC3|RUVBL2|ERCC2|DHX15|DDX19
	HIST1H2BN		CROP				ERCC2		MNT		TRRAP		8026	1.51e-09	3.45e-08	19	102	530	15461	ATP-dependent helicase activity	ASCC3L1|DDX18|XRCC6|DDX5|DDX3X|DDX3|DDX24|XRCC5|CETN1|DDX1|RECQL|DDX21|RHA|CHD4|ERCC3|RUVBL2|ERCC2|DHX15|DDX19
	HIST1H3H		CTIP2				ERCC3		MXD3		YBX1		3678	3.91e-09	8.61e-08	12	39	530	15461	DNA helicase activity	XRCC6|MCM7|ERCC3|XRCC5|RUVBL2|CHD8|RUVBL1|ERCC2|RECQL|RHA|CHD4|MCM6
	HSD17B7P2		CXXC1				ETS1		MXI1		ZNF384		2039	4.23e-09	9.03e-08	10	25	530	15461	p53 binding	CREBBP|SMARCB1|BRG1|CHD8|TAF9|SIRT1|INI1|SMARCA4|TP73|TAF1
	HYPK		DAP3				FGFBP1		NCL				42623	1.79e-08	3.7e-07	29	257	530	15461	ATPase activity, coupled	TOP2A|DDX5|DDX3X|DDX3|DDX24|BRG1|CETN1|DDX1|CHD8|DDX21|RHA|CHD4|RUVBL2|DHX15|DDX19|ASCC3L1|DDX18|XRCC6|RFC1|RFC2|XRCC5|RECQL|SMARCA2|SMARCA4|MYL6|CDK7|ERCC3|ERCC2|MYH9
	IFI6		DDX18				FLT1		NFIB				3690	2.08e-08	4.17e-07	17	95	530	15461	double-stranded DNA binding	EGR1|JUN|XRCC6|XRCC5|RECQL|HMGB1|YBX1|MLH1|USF2|USF1|PURA|RXRA|CREB1|SP1|ZNF638|SP3|TP53
	IGHM		DDX19				GLI2		NFIC				16887	2.24e-08	4.35e-07	32	307	530	15461	ATPase activity	TOP2A|DDX5|DDX3X|DDX3|DDX24|BRG1|CETN1|DDX1|CHD8|DDX21|RHA|CHD4|RUVBL2|SNF2H|DHX15|DDX19|ASCC3L1|DDX18|XRCC6|RFC1|RFC2|XRCC5|RECQL|SMARCA2|SMARCA3|SMARCA4|MYL6|CDK7|ERCC3|ERCC2|MYH9|ACIN1
	INTS4		DDX21				GRB2		NFIX				47485	4.33e-08	8.17e-07	15	77	530	15461	protein N-terminus binding	SRRM2|PARP1|BRG1|CSNK2A2|TAF11|GTF2H2|GRIN2C|GTF2H3|RELA|SMARCA4|ERCC3|ERCC2|EIF3E|MNAT1|TP53
	ITPK1		DDX24				GRIN1		NFKB1				35257	6.21e-08	1.14e-06	15	79	530	15461	nuclear hormone receptor binding	GTF2B|WSTF|TAF10|TAF11|RNF6|BRCA1|PHB2|MED14|CDK7|RXRA|KAT5|CCNE1|EP300|TAF7|RAN
	KLK5		DDX3				GRIN2A		NFKB2				4402	1.58e-07	2.76e-06	8	20	530	15461	histone acetyltransferase activity	KAT2B|CREBBP|KAT2A|MYST2|GTF3C4|EP300|CLOCK|TAF1
	KPNA5		DDX5				GRIN2B		NR2F1				4468	1.58e-07	2.76e-06	8	20	530	15461	lysine N-acetyltransferase activity	KAT2B|CREBBP|KAT2A|MYST2|GTF3C4|EP300|CLOCK|TAF1
	LGALS3		DHX15				GRIN2C		NR2F2				3724	1.65e-07	2.79e-06	9	27	530	15461	RNA helicase activity	DDX18|DDX5|DDX3X|DDX3|DDX24|DDX1|DHX15|DDX21|RHA
	LOC492303		DIMT1				GRIN2D		PARP1				70577	2.71e-07	4.48e-06	5	6	530	15461	histone acetyl-lysine binding	BRG1|WSTF|MLL|SMARCA4|TAF1
	LSM14B		DMAP1				GRINA		PBX1				166	3.01e-07	4.86e-06	120	2254	530	15461	nucleotide binding	BRG1|GIMAP1|HNRNPU|HNRNPR|SMC3|SMC4|SMC2|TUBB8|TUBB6|HNRPM|TUBB3|RUVBL2|RUVBL1|TUBB1|HNRPF|HNRPH|DDX18|MAP2K2|CSNK2A2|RECQL|ILF2|GTPBP4|TUBA4A|TUFM|EEF1A1|DYNC1LI1|LAP2|NCL|MATR3|RAF1|TP53|DDX5|DDX3|PRKDC|MINT|DDX1|RNPC2|PDS5B|HTATSF1|ORC5|ORC4|RNF213|SNF2H|EP400|ASCC3L1|MYH7B|XRCC6|XRCC5|WSTF|PLK1|NEK7|EIF2AK2|LARP7|PRG3|SMARCA2|SMARCA3|CDC2|SMARCA4|HNRNPL|CDK9|CDK7|CDK2|UBE2O|FARSA|SPF45|TUBA8|…
	LY6D		DNTTIP2				GRN		PCBP1				51427	3.73e-07	5.86e-06	15	90	530	15461	hormone receptor binding	GTF2B|WSTF|TAF10|TAF11|RNF6|BRCA1|PHB2|MED14|CDK7|RXRA|KAT5|CCNE1|EP300|TAF7|RAN
	MAP2K2		DPF2				GTF2B		PCBP2				35326	4.1e-07	6.15e-06	10	38	530	15461	enhancer binding	PURA|JUN|CEBPB|NFIX|TFAP4|CREB1|MITF|USF2|RELA|USF1
	MGC39584		DYNC1LI1				GTF2H1		PRKDC				3705	4.1e-07	6.15e-06	10	38	530	15461	RNA polymerase II transcription factor activity, enhancer binding	PURA|JUN|CEBPB|NFIX|TFAP4|CREB1|MITF|USF2|RELA|USF1
	MRGPRF		EEF1A1				GTF2H2		PSIP1				3725	8.47e-07	1.24e-05	9	32	530	15461	double-stranded RNA binding	ILF3|STAU2|PRKRA|EIF2AK2|DGCR8|RHA|ADAR|ILF2|TARBP2
	MRPS26		EEF1D				GTF2H3		RBBP4				3697	1.43e-06	2.03e-05	11	53	530	15461	single-stranded DNA binding	PURA|MCM7|MINT|SUB1|PCBP1|FUBP1|RECQL|MCM6|HMGB1|YBX1|TP53
	MRRF		EIF3A				GTF2H4		RBBP7				19899	1.44e-06	2.03e-05	46	636	530	15461	enzyme binding	TOP2A|HDAC2|CNAP1|LRP1|SDC4|HDAC1|CXCR4|BCL10|BRCA1|RELA|IPO5|DPP4|PPP1CC|CCNB1|POLR2A|RBBP4|PHKG2|PCBP2|TRIM24|EP300|HIST1H2AG|KPNA2|ZBTB7A|RANBP2|HIST1H2AM|HIST1H2AL|HIST1H2AI|CBX4|HIST1H2AK|TAF10|PLK1|H2AFX|SIRT1|GNB2L1|USF1|NFKBIA|KAT2B|KAT2A|TFAP4|SP1|BIRC5|ACIN1|TAF7|TP53|LUC7L2|RAPGEF4
	MS4A15		EIF3B				H2AFB3		RBM14				4003	1.64e-06	2.25e-05	8	26	530	15461	ATP-dependent DNA helicase activity	XRCC6|ERCC3|XRCC5|RUVBL2|ERCC2|RECQL|RHA|CHD4
	MYH7B		EIF3E				H2AFJ		RECQL				42393	2.54e-06	3.43e-05	11	56	530	15461	histone binding	NPM1|CNAP1|RBBP4|BRG1|WSTF|CHD8|H2AFX|MLL|SIRT1|SMARCA4|TAF1
	MYL6		EIF3F				H2AFV		REL				16986	6.64e-06	8.61e-05	4	5	530	15461	transcription initiation factor activity	TAF6L|TAF10|TRIM24|TAF4B
	N-PAC		ELYS				H2AFX		RELA				4972	6.64e-06	8.61e-05	4	5	530	15461	N-methyl-D-aspartate selective glutamate receptor activity	GRIN2A|GRIN2C|GRIN2B|GRIN2D
	NSUN2		EMD				H2AFY		RXRA				42826	8.03e-06	0.000102	9	41	530	15461	histone deacetylase binding	TOP2A|KAT2B|KAT2A|TFAP4|RBBP4|SP1|HDAC1|KPNA2|USF1
	PCID2		EP400				H2AFY2		SAP130				8022	1.28e-05	0.00016	17	148	530	15461	protein C-terminus binding	TOP2A|XRCC6|CNAP1|C23|XRCC5|TAF13|YEATS4|BCL10|SIRT1|CDK7|TFAP4|ERCC3|SP1|NCL|ERCC2|SDC1|PABPC1
	PHKG2		ERCC2				H2AFZ		SAP30				46982	1.63e-05	0.0002	21	215	530	15461	protein heterodimerization activity	ITGB1|TOP2A|JUN|CEBPB|NPM1|THRA|MAX|TFEB|SMC3|ZNFN1A1|SMC4|GRIN2B|USF2|PBX1|USF1|SMC2|AML1|RXRA|BIRC5|TP53|GABPA
	PHLDB1		FBL				H3F3A		SARNP				35258	1.8e-05	0.000216	9	45	530	15461	steroid hormone receptor binding	CDK7|KAT5|CCNE1|TAF10|EP300|RNF6|BRCA1|PHB2|RAN
	PLA2G2A		GATAD2A				H3F3B		SFPQ				51059	2.06e-05	0.000243	6	18	530	15461	NF-kappaB binding	NFKBIA|NPM1|EP300|TAF4B|BCL10|RELA
	PLCB2		GCN1L1				HIST1H2AA		SIN3A				4004	2.92e-05	0.000339	6	19	530	15461	ATP-dependent RNA helicase activity	DDX18|DDX3X|DDX3|DDX24|DDX21|RHA
	PLSCR1		GIMAP1				HIST1H2AB		SND1				8135	3.59e-05	0.00041	11	73	530	15461	translation factor activity, nucleic acid binding	EEF1A1|EEF1D|GTF2B|GCN1L1|EIF3E|GTF2H2|EIF3F|GTF2H3|EIF3A|EIF3B|TUFM
	PNLIPRP1		GNB2L1				HIST1H2AC		SP1				8186	4.06e-05	0.000454	6	20	530	15461	RNA-dependent ATPase activity	DDX18|DDX3X|DDX3|DDX24|DDX21|RHA
	POLM		GNL3				HIST1H2AD		SP3				3714	4.12e-05	0.000454	16	146	530	15461	transcription corepressor activity	TGIF1|LRP1|CBX4|MINT|NR2F2|SIRT1|SAP30|RELB|YY1|MNT|SIN3A|BASP1|APEX1|MXI1|SAP18|DMAP1
	PQLC2		GTF3C4				HIST1H2AE		SUB1				16566	4.35e-05	0.000472	8	39	530	15461	specific transcriptional repressor activity	YY1|HDAC2|TFAP4|HDAC1|BASP1|TAF7|ZNFN1A1|PHB2
	PTCD3		GTF3C5				HIST1H2AG		TBX20				8080	6.03e-05	0.000643	9	52	530	15461	N-acetyltransferase activity	KAT2B|CREBBP|KAT2A|MYST2|GTF3C4|NAT10|EP300|CLOCK|TAF1
	PTPRS		GTPBP4				HIST1H2AH		TFAP4				32553	7.56e-05	0.000781	93	1845	530	15461	ribonucleotide binding	TOP2A|FLT1|DDX3X|MCM7|BRG1|CETN1|CHD8|GIMAP1|HNRNPU|NAT10|CHD4|SMC3|SMC4|SMC2|AML1|TUBB8|TUBA1C|TUBA1B|TUBB6|TUBA1A|TUBB3|RUVBL2|RUVBL1|TUBB1|DHX15|DDX18|MAP2K2|CAMK1D|RFC1|RFC2|CSNK2A2|ACTL6A|ITPK1|RECQL|KIF22|ILF2|GTPBP4|TUBA4A|GNL3|TUFM|EEF1A1|DYNC1LI1|ZAP70|TUBB2A|LAP2|MCM3|MYH9|MCM6|TOP1|RAF1|TP53|RAPGEF4|DDX5|DDX3|DDX24|PRKDC|DDX1|TAF9|DDX21|RHA|PDS5B|ORC5|ORC4|BTAF1|TUBA3C|SNF2H|PHKG2|EP40…
	PYHIN1		HCA66				HIST1H2AI		TFE3				32555	7.56e-05	0.000781	93	1845	530	15461	purine ribonucleotide binding	TOP2A|FLT1|DDX3X|MCM7|BRG1|CETN1|CHD8|GIMAP1|HNRNPU|NAT10|CHD4|SMC3|SMC4|SMC2|AML1|TUBB8|TUBA1C|TUBA1B|TUBB6|TUBA1A|TUBB3|RUVBL2|RUVBL1|TUBB1|DHX15|DDX18|MAP2K2|CAMK1D|RFC1|RFC2|CSNK2A2|ACTL6A|ITPK1|RECQL|KIF22|ILF2|GTPBP4|TUBA4A|GNL3|TUFM|EEF1A1|DYNC1LI1|ZAP70|TUBB2A|LAP2|MCM3|MYH9|MCM6|TOP1|RAF1|TP53|RAPGEF4|DDX5|DDX3|DDX24|PRKDC|DDX1|TAF9|DDX21|RHA|PDS5B|ORC5|ORC4|BTAF1|TUBA3C|SNF2H|PHKG2|EP40…
	RAF1		HCAP-G				HIST1H2AJ		TFEB				43425	8.56e-05	0.000871	4	8	530	15461	bHLH transcription factor binding	CREBBP|EP300|USF2|USF1
	RAPGEF4		HDAC1				HIST1H2AK		TGIF1				42162	0.000105	0.00105	5	15	530	15461	telomeric DNA binding	PURA|AUF1|C23|XRCC5|NCL
	RGR		HDAC2				HIST1H2AL		TOP1				42809	0.000148	0.00144	5	16	530	15461	vitamin D receptor binding	MED14|RXRA|WSTF|TAF11|TAF7
	RILPL1		HNRPF				HIST1H2AM		USF1				17025	0.00015	0.00144	4	9	530	15461	TATA-binding protein binding	CAND1|THRA|HNRPF|TAF1
	RNF38		HNRPH				HIST1H2BA		USF2				8139	0.00015	0.00144	4	9	530	15461	nuclear localization sequence binding	NFKBIA|KPNA2|TNPO1|KPNB1
	SAP18		HNRPM				HIST1H2BB		XRCC5				8353	0.000156	0.00147	3	4	530	15461	RNA polymerase II carboxy-terminal domain kinase activity	CDK9|CDK7|CDC2
	SENP5		HP1BP3				HIST1H2BC		XRCC6				16787	0.000172	0.0016	107	2240	530	15461	hydrolase activity	AHCYL2|AHCYL1|BRG1|RPP30|SMC3|TUBB8|PPP1CC|TUBB6|TUBB3|RUVBL2|RUVBL1|TUBB1|DDX18|RECQL|GTPBP4|SND1|TUBA4A|TUFM|EEF1A1|DYNC1LI1|MYL6|DDX5|DULLARD|DDX3|DDX1|KLK5|DPP4|ORC4|RNF213|SNF2H|EP400|ASCC3L1|MYH7B|XRCC6|XRCC5|PRG2|PRG4|SMARCA2|SMARCA3|CDC2|SMARCA4|CDK7|TUBA8|TOP2A|PNLIPRP1|PTPRS|DDX3X|MCM7|CETN1|CHD8|ADAR|CHD4|TUBA1C|TUBA1B|TUBA1A|SENP5|DHX15|CD38|ACP1|RFC1|RFC2|ITPK1|KIF22|SIRT1|SENP3|PSMA…
	SLC25A36		ILF2				HIST1H2BD		YBX1				17076	0.00023	0.00211	94	1928	530	15461	purine nucleotide binding	TOP2A|FLT1|DDX3X|MCM7|BRG1|CETN1|CHD8|GIMAP1|HNRNPU|NAT10|CHD4|SMC3|SMC4|SMC2|AML1|TUBB8|TUBA1C|TUBA1B|TUBB6|TUBA1A|TUBB3|RUVBL2|RUVBL1|TUBB1|DHX15|DDX18|MAP2K2|CAMK1D|RFC1|RFC2|CSNK2A2|ACTL6A|ITPK1|RECQL|KIF22|ILF2|GTPBP4|TUBA4A|GNL3|TUFM|EEF1A1|DYNC1LI1|ZAP70|TUBB2A|LAP2|MCM3|MYH9|MCM6|TOP1|RAF1|TP53|RAPGEF4|DDX5|DDX3|DDX24|PRKDC|DDX1|TAF9|DDX21|RHA|PDS5B|ORC5|ORC4|BTAF1|TUBA3C|SNF2H|PHKG2|EP40…
	SMARCA2		ILF3				HIST1H2BE						16407	0.000314	0.00284	9	64	530	15461	acetyltransferase activity	KAT2B|CREBBP|KAT2A|MYST2|GTF3C4|NAT10|EP300|CLOCK|TAF1
	SRP14		INI1				HIST1H2BF						5234	0.000362	0.00324	5	19	530	15461	extracellular-glutamate-gated ion channel activity	GRIN2A|GRIN2C|GRIN2B|GRIN2D|GRIN1
	STRA13		KIAA0020				HIST1H2BG						35035	0.000372	0.00328	4	11	530	15461	histone acetyltransferase binding	SP1|TAF7|ZBTB7A|TP53
	TAF6L		KIF22				HIST1H2BH						16410	0.000397	0.00345	9	66	530	15461	N-acyltransferase activity	KAT2B|CREBBP|KAT2A|MYST2|GTF3C4|NAT10|EP300|CLOCK|TAF1
	TINP1		KPNA2				HIST1H2BI						50681	0.000464	0.00398	6	30	530	15461	androgen receptor binding	CDK7|KAT5|CCNE1|RNF6|BRCA1|RAN
	TUSC4		KPNB1				HIST1H2BJ						32559	0.000495	0.0042	75	1497	530	15461	adenyl ribonucleotide binding	TOP2A|FLT1|DDX3X|MCM7|BRG1|CETN1|CHD8|HNRNPU|NAT10|CHD4|SMC3|SMC4|SMC2|AML1|RUVBL2|RUVBL1|DHX15|DDX18|MAP2K2|CAMK1D|RFC1|RFC2|CSNK2A2|ACTL6A|ITPK1|RECQL|KIF22|ILF2|DYNC1LI1|ZAP70|LAP2|MCM3|MYH9|MCM6|TOP1|RAF1|TP53|RAPGEF4|DDX5|DDX3|DDX24|PRKDC|DDX1|TAF9|DDX21|RHA|PDS5B|ORC5|ORC4|BTAF1|SNF2H|PHKG2|EP400|DDX19|ASCC3L1|MYH7B|XRCC6|XRCC5|WSTF|PLK1|NEK7|EIF2AK2|MLH1|SMARCA2|SMARCA3|CDC2|SMARCA4|CDK9|C…
	ULBP2		LAP1B				HIST1H2BK						5524	0.000511	0.00427	74	1474	530	15461	ATP binding	TOP2A|FLT1|DDX3X|MCM7|BRG1|CETN1|CHD8|HNRNPU|NAT10|CHD4|SMC3|SMC4|SMC2|AML1|RUVBL2|RUVBL1|DHX15|DDX18|MAP2K2|CAMK1D|RFC1|RFC2|CSNK2A2|ACTL6A|ITPK1|RECQL|KIF22|ILF2|DYNC1LI1|ZAP70|LAP2|MCM3|MYH9|MCM6|TOP1|RAF1|TP53|DDX5|DDX3|DDX24|PRKDC|DDX1|TAF9|DDX21|RHA|PDS5B|ORC5|ORC4|BTAF1|SNF2H|PHKG2|EP400|DDX19|ASCC3L1|MYH7B|XRCC6|XRCC5|WSTF|PLK1|NEK7|EIF2AK2|MLH1|SMARCA2|SMARCA3|CDC2|SMARCA4|CDK9|CDK7|ERCC…
	WSCD1		LAP2				HIST1H2BL						5048	0.000754	0.00623	5	22	530	15461	signal sequence binding	NFKBIA|KPNA2|TNPO1|SRP14|KPNB1
	ZNF16		LBR				HIST1H2BM
	ZNF384		LMNB				HIST1H2BN						34 proteins
			LUC7L2				HIST1H2BO						GO-ID	p-value	corr p-value	x	n	X	N	Description	Genes in test set
			MATR3				HIST1H3A						8134	3.14e-11	3.92e-09	13	522	34	15444	transcription factor binding	CEBPB|DDX5|NPM1|RBM14|HDAC1|PRKDC|TRRAP|SIRT1|RELA|NFKB2|SIN3A|SUB1|SAP18
			MBD2				HIST1H3B						30528	2.8e-10	1.75e-08	18	1507	34	15444	transcription regulator activity	CEBPB|DDX5|NPM1|RBM14|ZNF384|HDAC1|TRRAP|YBX1|AFF4|SIRT1|RELA|NFKB1|NFKB2|BTAF1|SIN3A|SUB1|SP3|SAP18
			MBD3				HIST1H3C						16563	1.78e-08	7.41e-07	10	429	34	15444	transcription activator activity	CEBPB|NPM1|RBM14|ZNF384|HDAC1|TRRAP|SUB1|SP3|RELA|NFKB2
			MCM3				HIST1H3D						3677	4.28e-08	1.16e-06	19	2328	34	15444	DNA binding	HIST1H2BN|CEBPB|ZNF384|TAF15|CCNT1|HDAC1|PRKDC|YBX1|AFF4|RELA|NFKB1|NFKB2|CDK9|BTAF1|SIN3A|SUB1|SP3|HIST1H3H|HIST1H2BD
			MCM6				HIST1H3E						3676	4.65e-08	1.16e-06	22	3252	34	15444	nucleic acid binding	HIST1H2BN|CEBPB|DDX5|NPM1|RBM14|ZNF384|TAF15|CCNT1|HDAC1|PRKDC|YBX1|AFF4|RELA|NFKB1|NFKB2|CDK9|BTAF1|SIN3A|SUB1|SP3|HIST1H3H|HIST1H2BD
			MCM7				HIST1H3F						3712	6.19e-08	1.29e-06	9	363	34	15444	transcription cofactor activity	DDX5|NPM1|RBM14|TRRAP|SIN3A|SUB1|SAP18|SIRT1|NFKB2
			MINT				HIST1H3G						16564	6.76e-06	0.000121	7	334	34	15444	transcription repressor activity	HDAC1|SIN3A|SP3|SAP18|YBX1|SIRT1|RELA
			MLH1				HIST1H3H						5515	6.44e-05	0.00101	29	8123	34	15444	protein binding	CEBPB|DDX5|CCNT1|HDAC1|PRKDC|TRRAP|YBX1|AFF4|RELA|PPP1CC|RBBP4|SIN3A|C1QBP|LMNA|SAP18|HIST1H3H|RBBP7|KPNA2|NPM1|RBM14|ZNF384|SIRT1|NFKB1|NFKB2|CDK9|SUB1|ERCC2|SP3|KPNB1
			MLL				HIST1H3I						42826	9.81e-05	0.00125	3	41	34	15444	histone deacetylase binding	RBBP4|HDAC1|KPNA2
			MTA1				HIST1H3J						3713	9.99e-05	0.00125	5	215	34	15444	transcription coactivator activity	NPM1|RBM14|TRRAP|SUB1|NFKB2
			MTA2				HIST1H4A						3700	0.000157	0.00175	9	950	34	15444	transcription factor activity	CEBPB|BTAF1|HDAC1|SIN3A|YBX1|AFF4|RELA|NFKB1|NFKB2
			MTA3				HIST1H4B						8139	0.000168	0.00175	2	9	34	15444	nuclear localization sequence binding	KPNA2|KPNB1
			MYEF2				HIST1H4C						42393	0.000237	0.00227	3	55	34	15444	histone binding	NPM1|RBBP4|SIRT1
			MYH9				HIST1H4D						17069	0.000256	0.00228	2	11	34	15444	snRNA binding	CDK9|CCNT1
			MYST2				HIST1H4E						33558	0.000485	0.00379	2	15	34	15444	protein deacetylase activity	HDAC1|SIRT1
			NAT10				HIST1H4F						4407	0.000485	0.00379	2	15	34	15444	histone deacetylase activity	HDAC1|SIRT1
			NEK7				HIST1H4G						5488	0.000521	0.00383	34	12368	34	15444	binding	HIST1H2BN|CEBPB|DDX5|CCNT1|HDAC1|PRKDC|TRRAP|YBX1|AFF4|RELA|PPM1G|PPP1CC|BTAF1|RBBP4|SIN3A|C1QBP|LMNA|SAP18|HIST1H3H|RBBP7|KPNA2|NPM1|RBM14|ZNF384|TAF15|SIRT1|NFKB1|NFKB2|CDK9|SUB1|ERCC2|SP3|HIST1H2BD|KPNB1
			NOL1				HIST1H4H						19213	0.000704	0.00463	2	18	34	15444	deacetylase activity	HDAC1|SIRT1
			NOL5A				HIST1H4I						51059	0.000704	0.00463	2	18	34	15444	NF-kappaB binding	NPM1|RELA
			NOP5/NOP58				HIST1H4J						3723	0.000915	0.00572	7	732	34	15444	RNA binding	CDK9|DDX5|NPM1|RBM14|TAF15|CCNT1|YBX1
			NPM1				HIST1H4K
			NUMA1				HIST1H4L
			NUP153				HIST2H2AA3
			NUP205				HIST2H2AB
			NUP85				HIST2H2AC
			NUP88				HIST2H2BE
			NUP93				HIST2H3C
			NUP98				HIST2H4A
			ORC4				HIST3H2A
			ORC5				HIST3H2BB
			PABPC1				HIST3H3
			PAF1				HIST4H4
			PDS5A				HTATSF1
			PDS5B				IGFBP4
			PES1				IPO5
			PHB				IRF1
			PHB2				ITGA5
			PLK1				ITGAV
			PNN				ITGB1
			POLR2A				ITGB3
			POLR2B				ITGB5
			PPP1CC				JUN
			PRPF8				KAT2A
			RAN				KAT2B
			RANBP2				KAT5
			RANGAP1				KPNA2
			RBBP4				KPNB1
			RBBP6				LAMP2
			RBBP7				LMNA
			RBM14				LMNB1
			RCD-8				LMNB2
			Ret-CoR				LRP1
			RFC1				MDFI
			RFC2				MDFIC
			RHA				MED14
			RNF213				MED6
			RNF6				MNAT1
			RNPC2				MYC
			RPP30				NELFA
			RUVBL1				NELFB
			RUVBL2				NELFCD
			SAP18				NELFE
			SENP3				NFATC2
			SETDA1				NFKB1
			SF3b155				NFKB2
			SF3B3				NFKBIA
			SIN3A				NPM1
			SMARCA3				POU2F1
			SMC2				PPM1G
			SMC3				PPP1CA
			SMC4				PPP1CC
			SNF2H				PPP1R8
			SOX4				PRG2
			SPF45				PRG3
			SSRP1				PRG4
			STAU2				PRKDC
			SUPT16H				PRKRA
			SUZ12				PSMA2
			TAF15				PSMA4
			TBL3				PSMA6
			THOC1				PSMA7
			TOP2A				PSMB1
			TRRAP				PSMB10
			TUFM				PSMB2
			UBTF				PSMB3
			WDR5				PSMB5
			WHSC1				PSMB6
			WSTF				PSMB7
			XPO1				PSMB8
			YBX1				PURA
			YEATS4				RBL2
			YY1				RELA
			ZAP70				RELB
			ZNF384				RNGTT
			ZNF512				SDC1
			ZNF638				SDC2
			ZNFN1A1				SDC3
							SDC4
							SDHB
							SETD7
							SETDB2
							SIRT1
							SLC6A3
							SMARCA4
							SMARCB1
							SNW1
							SP1
							SUB1
							TAF1
							TAF10
							TAF11
							TAF12
							TAF13
							TAF15
							TAF2
							TAF3
							TAF4
							TAF4B
							TAF5
							TAF6
							TAF7
							TAF8
							TAF9
							TARBP2
							TBP
							TCERG1
							THBS1
							THRA
							TNPO1
							TP53
							TP73
							TRIM24
							TRIM32
							TRRAP
							TUBA1A
							TUBA1B
							TUBA1C
							TUBA3C
							TUBA4A
							TUBA8
							TUBB1
							TUBB2A
							TUBB3
							TUBB4A
							TUBB4B
							TUBB6
							TUBB8
							YBX1
							ZBTB7A
