# Supplementary material for: Identification of HIV-1 Tat-Associated Proteins Contributing to HIV-1 Transcription and Latency
Source: Viruses. 2017 Apr 1;9(4):67. doi: 10.3390/v9040067 (PMC5408673; doi:10.3390/v9040067)
Supplement: Supplementary file 1 [file viruses-09-00067-s001.tgz › Supplementary revised/SupplementaryMaterials/TableS2.xlsx]

## Sheet: 34 proteins
#node1	node2	node1_string_internal_id	node2_string_internal_id	node1_external_id	node2_external_id	neighborhood_on_chromosome	gene_fusion	phylogenetic_cooccurrence	homology	coexpression	experimentally_determined_interaction	database_annotated	automated_textmining	combined_score
HDAC1	NFKB1	1855935	1843094	9606.ENSP00000362649	9606.ENSP00000226574	0	0	0	0	0	0.999	0	0.604	0.999
RBBP7	SIN3A	1857150	1854005	9606.ENSP00000369424	9606.ENSP00000353622	0	0	0	0	0	0.967	0.9	0.896	0.999
RBBP7	HDAC1	1857150	1855935	9606.ENSP00000369424	9606.ENSP00000362649	0	0	0	0	0	0.999	0.9	0.915	0.999
HDAC1	SIN3A	1855935	1854005	9606.ENSP00000362649	9606.ENSP00000353622	0	0	0	0	0	0.999	0.9	0.959	0.999
HDAC1	RBBP4	1855935	1855919	9606.ENSP00000362649	9606.ENSP00000362592	0	0	0	0	0	0.999	0.9	0.915	0.999
CDK9	CCNT1	1855868	1845024	9606.ENSP00000362361	9606.ENSP00000261900	0	0	0	0	0	0.999	0.9	0.992	0.999
KPNA2	KPNB1	1851476	1847208	9606.ENSP00000332455	9606.ENSP00000290158	0	0	0	0	0	0.841	0.9	0.983	0.999
RELA	NFKB1	1858923	1843094	9606.ENSP00000384273	9606.ENSP00000226574	0	0	0	0.797	0	0.999	0.9	0.985	0.999
RBBP4	SIN3A	1855919	1854005	9606.ENSP00000362592	9606.ENSP00000353622	0	0	0	0	0	0.994	0.9	0.891	0.999
RELA	HDAC1	1858923	1855935	9606.ENSP00000384273	9606.ENSP00000362649	0	0	0	0	0	0.999	0	0.599	0.999
CDK9	AFF4	1855868	1845731	9606.ENSP00000362361	9606.ENSP00000265343	0	0	0	0	0	0.999	0	0.472	0.999
RBBP7	RBBP4	1857150	1855919	9606.ENSP00000369424	9606.ENSP00000362592	0	0	0	0.988	0	0.993	0.9	0.809	0.999
AFF4	CCNT1	1845731	1845024	9606.ENSP00000265343	9606.ENSP00000261900	0	0	0	0	0	0.985	0	0.899	0.998
CEBPB	NFKB1	1848728	1843094	9606.ENSP00000305422	9606.ENSP00000226574	0	0	0	0	0	0.576	0.9	0.943	0.997
RELA	NFKB2	1858923	1855147	9606.ENSP00000384273	9606.ENSP00000358983	0	0	0	0.806	0	0.966	0.9	0.93	0.997
SAP18	SIN3A	1857541	1854005	9606.ENSP00000371973	9606.ENSP00000353622	0	0	0	0	0	0.806	0.9	0.838	0.996
RELA	CEBPB	1858923	1848728	9606.ENSP00000384273	9606.ENSP00000305422	0	0	0	0	0	0.917	0.9	0.586	0.996
HDAC1	SP3	1855935	1849281	9606.ENSP00000362649	9606.ENSP00000310301	0	0	0	0	0	0.992	0	0.4	0.995
NFKB2	NFKB1	1855147	1843094	9606.ENSP00000358983	9606.ENSP00000226574	0	0	0	0.801	0	0.905	0.9	0.96	0.991
SAP18	HDAC1	1857541	1855935	9606.ENSP00000371973	9606.ENSP00000362649	0	0	0	0	0	0.683	0.9	0.568	0.985
RELA	SIRT1	1858923	1842473	9606.ENSP00000384273	9606.ENSP00000212015	0	0	0	0	0	0.812	0	0.896	0.979
SAP18	RBBP7	1857541	1857150	9606.ENSP00000371973	9606.ENSP00000369424	0	0	0	0	0	0	0.9	0.702	0.969
SAP18	RBBP4	1857541	1855919	9606.ENSP00000371973	9606.ENSP00000362592	0	0	0	0	0	0	0.9	0.634	0.961
HDAC1	TRRAP	1855935	1853208	9606.ENSP00000362649	9606.ENSP00000347733	0	0	0	0	0	0.09	0.9	0.462	0.946
ERCC2	CCNT1	1857962	1845024	9606.ENSP00000375809	9606.ENSP00000261900	0	0	0	0	0	0.3	0.9	0.211	0.94
RELA	CDK9	1858923	1855868	9606.ENSP00000384273	9606.ENSP00000362361	0	0	0	0	0	0.576	0	0.866	0.94
RBBP4	NPM1	1855919	1847808	9606.ENSP00000362592	9606.ENSP00000296930	0	0	0	0	0	0.303	0.9	0.199	0.939
HDAC1	PPP1CC	1855935	1851808	9606.ENSP00000362649	9606.ENSP00000335084	0	0	0	0	0	0.914	0	0.249	0.933
NPM1	KPNB1	1847808	1847208	9606.ENSP00000296930	9606.ENSP00000290158	0	0	0	0	0	0	0.9	0.208	0.917
RBBP7	NPM1	1857150	1847808	9606.ENSP00000369424	9606.ENSP00000296930	0	0	0	0	0	0	0.9	0.198	0.916
ERCC2	CDK9	1857962	1855868	9606.ENSP00000375809	9606.ENSP00000362361	0	0	0	0	0	0	0.9	0.184	0.914
HDAC1	SIRT1	1855935	1842473	9606.ENSP00000362649	9606.ENSP00000212015	0	0	0	0	0	0.364	0	0.858	0.906
HIST1H2BN	HDAC1	1858441	1855935	9606.ENSP00000380177	9606.ENSP00000362649	0	0	0	0	0	0.304	0.8	0.37	0.904
HDAC1	HIST1H2BD	1855935	1847163	9606.ENSP00000362649	9606.ENSP00000289316	0	0	0	0	0	0.304	0.8	0.37	0.904
ERCC2	HDAC1	1857962	1855935	9606.ENSP00000375809	9606.ENSP00000362649	0	0	0	0	0	0	0.9	0.088	0.904
HIST1H2BN	HIST1H2BD	1858441	1847163	9606.ENSP00000380177	9606.ENSP00000289316	0	0	0	0.988	0	0	0.9	0.912	0.901
ERCC2	RBBP7	1857962	1857150	9606.ENSP00000375809	9606.ENSP00000369424	0	0	0	0	0	0	0.9	0	0.9
ERCC2	RBBP4	1857962	1855919	9606.ENSP00000375809	9606.ENSP00000362592	0	0	0	0	0	0	0.9	0	0.9
NPM1	SIRT1	1847808	1842473	9606.ENSP00000296930	9606.ENSP00000212015	0	0	0	0	0	0.33	0	0.834	0.884
HDAC1	CEBPB	1855935	1848728	9606.ENSP00000362649	9606.ENSP00000305422	0	0	0	0	0	0.812	0	0.395	0.881
RBBP4	SP3	1855919	1849281	9606.ENSP00000362592	9606.ENSP00000310301	0	0	0	0	0	0.805	0	0.304	0.859
RBBP4	LMNA	1855919	1854773	9606.ENSP00000362592	9606.ENSP00000357283	0	0	0	0	0	0.576	0	0.64	0.84
RELA	YBX1	1858923	1855704	9606.ENSP00000384273	9606.ENSP00000361626	0	0	0	0	0	0	0	0.831	0.831
NFKB1	SIRT1	1843094	1842473	9606.ENSP00000226574	9606.ENSP00000212015	0	0	0	0	0	0.614	0	0.581	0.831
HDAC1	NFKB2	1855935	1855147	9606.ENSP00000362649	9606.ENSP00000358983	0	0	0	0	0	0.726	0	0.389	0.826
CDK9	PPP1CC	1855868	1851808	9606.ENSP00000362361	9606.ENSP00000335084	0	0	0	0	0	0.812	0	0.067	0.817
CDK9	ZNF384	1855868	1854163	9606.ENSP00000362361	9606.ENSP00000354592	0	0	0	0	0	0	0	0.778	0.778
SIN3A	NFKB1	1854005	1843094	9606.ENSP00000353622	9606.ENSP00000226574	0	0	0	0	0	0.726	0	0.179	0.766
NFKB2	SIN3A	1855147	1854005	9606.ENSP00000358983	9606.ENSP00000353622	0	0	0	0	0	0.726	0	0.131	0.752
RELA	SIN3A	1858923	1854005	9606.ENSP00000384273	9606.ENSP00000353622	0	0	0	0	0	0.692	0	0.201	0.743
CDK9	NFKB1	1855868	1843094	9606.ENSP00000362361	9606.ENSP00000226574	0	0	0	0	0	0.59	0	0.391	0.74
ERCC2	BTAF1	1857962	1845838	9606.ENSP00000375809	9606.ENSP00000265990	0	0	0	0	0	0.102	0	0.692	0.712
HIST1H3H	HIST1H2BD	1854968	1847163	9606.ENSP00000358160	9606.ENSP00000289316	0	0	0	0	0	0.297	0	0.589	0.699
HDAC1	NPM1	1855935	1847808	9606.ENSP00000362649	9606.ENSP00000296930	0	0	0	0	0	0.576	0	0.308	0.694
YBX1	PRKDC	1855704	1849621	9606.ENSP00000361626	9606.ENSP00000313420	0	0	0	0	0	0.644	0	0.17	0.691
YBX1	C1QBP	1855704	1843043	9606.ENSP00000361626	9606.ENSP00000225698	0	0	0	0	0	0.617	0	0.197	0.68
HIST1H2BN	HIST1H3H	1858441	1854968	9606.ENSP00000380177	9606.ENSP00000358160	0	0	0	0	0	0.297	0	0.561	0.678
PRKDC	NFKB1	1849621	1843094	9606.ENSP00000313420	9606.ENSP00000226574	0	0	0	0	0	0.407	0	0.446	0.658
YBX1	NPM1	1855704	1847808	9606.ENSP00000361626	9606.ENSP00000296930	0	0	0	0	0	0.513	0	0.309	0.649
RELA	PRKDC	1858923	1849621	9606.ENSP00000384273	9606.ENSP00000313420	0	0	0	0	0	0.57	0	0.216	0.648
SP3	CEBPB	1849281	1848728	9606.ENSP00000310301	9606.ENSP00000305422	0	0	0	0	0	0.566	0	0.219	0.646
LMNA	PRKDC	1854773	1849621	9606.ENSP00000357283	9606.ENSP00000313420	0	0	0	0	0	0.576	0	0.193	0.643
RELA	SP3	1858923	1849281	9606.ENSP00000384273	9606.ENSP00000310301	0	0	0	0	0	0.566	0	0.197	0.636
RBBP7	LMNA	1857150	1854773	9606.ENSP00000369424	9606.ENSP00000357283	0	0	0	0	0	0	0	0.626	0.626
YBX1	PPM1G	1855704	1845605	9606.ENSP00000361626	9606.ENSP00000264714	0	0	0	0	0	0.564	0	0.159	0.617
TAF15	ZNF384	1863971	1854163	9606.ENSP00000466950	9606.ENSP00000354592	0	0	0	0	0	0.576	0	0.128	0.614
RBBP4	HIST1H3H	1855919	1854968	9606.ENSP00000362592	9606.ENSP00000358160	0	0	0	0	0	0.334	0	0.425	0.6
RBBP7	HIST1H3H	1857150	1854968	9606.ENSP00000369424	9606.ENSP00000358160	0	0	0	0	0	0.334	0	0.425	0.6
SAP18	RBM14	1857541	1849459	9606.ENSP00000371973	9606.ENSP00000311747	0	0	0	0	0	0.581	0	0	0.581
RELA	KPNA2	1858923	1851476	9606.ENSP00000384273	9606.ENSP00000332455	0	0	0	0	0	0.576	0	0.053	0.581
PPP1CC	SP3	1851808	1849281	9606.ENSP00000335084	9606.ENSP00000310301	0	0	0	0	0	0.576	0	0	0.575
YBX1	DDX5	1855704	1843052	9606.ENSP00000361626	9606.ENSP00000225792	0	0	0	0	0	0.11	0	0.541	0.574
HDAC1	HIST1H3H	1855935	1854968	9606.ENSP00000362649	9606.ENSP00000358160	0	0	0	0	0	0.305	0	0.377	0.548
ERCC2	PRKDC	1857962	1849621	9606.ENSP00000375809	9606.ENSP00000313420	0	0	0	0	0	0	0	0.547	0.547
SIN3A	SP3	1854005	1849281	9606.ENSP00000353622	9606.ENSP00000310301	0	0	0	0	0	0.181	0	0.388	0.478
CDK9	SUB1	1855868	1845682	9606.ENSP00000362361	9606.ENSP00000265073	0	0	0	0	0	0.3	0	0.276	0.472
RBBP7	CDK9	1857150	1855868	9606.ENSP00000369424	9606.ENSP00000362361	0	0	0	0	0	0.469	0	0	0.469
HDAC1	CDK9	1855935	1855868	9606.ENSP00000362649	9606.ENSP00000362361	0	0	0	0	0	0.104	0	0.43	0.468
SIN3A	SIRT1	1854005	1842473	9606.ENSP00000353622	9606.ENSP00000212015	0	0	0	0	0	0.078	0	0.444	0.465
NFKB2	PRKDC	1855147	1849621	9606.ENSP00000358983	9606.ENSP00000313420	0	0	0	0	0	0.263	0	0.286	0.452
YBX1	SIRT1	1855704	1842473	9606.ENSP00000361626	9606.ENSP00000212015	0	0	0	0	0	0.358	0	0.14	0.424
NPM1	C1QBP	1847808	1843043	9606.ENSP00000296930	9606.ENSP00000225698	0	0	0	0	0	0.303	0	0.205	0.422
NFKB2	SIRT1	1855147	1842473	9606.ENSP00000358983	9606.ENSP00000212015	0	0	0	0	0	0.323	0	0.177	0.419
HIST1H3H	SIN3A	1854968	1854005	9606.ENSP00000358160	9606.ENSP00000353622	0	0	0	0	0	0.299	0	0.201	0.415
CDK9	SIN3A	1855868	1854005	9606.ENSP00000362361	9606.ENSP00000353622	0	0	0	0	0	0.359	0	0.125	0.415
CDK9	YBX1	1855868	1855704	9606.ENSP00000362361	9606.ENSP00000361626	0	0	0	0	0	0.357	0	0.126	0.413
ERCC2	KPNA2	1857962	1851476	9606.ENSP00000375809	9606.ENSP00000332455	0	0	0	0	0	0.277	0	0.206	0.401
HDAC1	PRKDC	1855935	1849621	9606.ENSP00000362649	9606.ENSP00000313420	0	0	0	0	0	0.09	0	0.369	0.401

## Sheet: 566 proteins
#node1	node2	node1_string_internal_id	node2_string_internal_id	node1_external_id	node2_external_id	neighborhood_on_chromosome	gene_fusion	phylogenetic_cooccurrence	homology	coexpression	experimentally_determined_interaction	database_annotated	automated_textmining	combined_score
PSMA6	PSMA2	1844920	1842974	9606.ENSP00000261479	9606.ENSP00000223321	0	0	0	0.859	0	0.999	0.9	0.738	0.999
TAF6	TAF8	1860193	1855796	9606.ENSP00000399982	9606.ENSP00000362068	0	0	0	0	0	0.999	0.9	0.822	0.999
HIST1H4A	EP300	1853925	1845316	9606.ENSP00000352980	9606.ENSP00000263253	0	0	0	0	0	0.999	0	0.252	0.999
TAF1	TAF4	1846471	1844180	9606.ENSP00000276072	9606.ENSP00000252996	0	0	0	0	0	0.999	0.9	0.896	0.999
BTAF1	TBP	1845838	1843249	9606.ENSP00000265990	9606.ENSP00000230354	0	0	0	0	0	0.995	0	0.987	0.999
TBP	TAF9	1843249	1842675	9606.ENSP00000230354	9606.ENSP00000217893	0	0	0	0	0	0.999	0.9	0.799	0.999
HDAC1	YY1	1855935	1845097	9606.ENSP00000362649	9606.ENSP00000262238	0	0	0	0	0	0.985	0.9	0.903	0.999
TRRAP	KAT2B	1853208	1845408	9606.ENSP00000347733	9606.ENSP00000263754	0	0	0	0	0	0.668	0.9	0.983	0.999
TP53	TBP	1846083	1843249	9606.ENSP00000269305	9606.ENSP00000230354	0	0	0	0	0	0.992	0.8	0.926	0.999
NFATC2	JUN	1858353	1855436	9606.ENSP00000379330	9606.ENSP00000360266	0	0	0	0	0	0.955	0.9	0.938	0.999
CHD4	MBD3	1853454	1842265	9606.ENSP00000349508	9606.ENSP00000156825	0	0	0	0	0	0.993	0.9	0.59	0.999
NCAPD2	NCAPG	1850703	1844063	9606.ENSP00000325017	9606.ENSP00000251496	0	0	0	0	0	0.999	0.9	0.811	0.999
PSMB2	PSMB7	1855861	1844696	9606.ENSP00000362334	9606.ENSP00000259457	0	0	0	0	0	0.996	0.9	0.669	0.999
RUVBL2	RUVBL1	1864926	1850035	9606.ENSP00000473172	9606.ENSP00000318297	0	0	0	0.931	0	0.999	0.9	0.994	0.999
GTF2H1	MNAT1	1845828	1844871	9606.ENSP00000265963	9606.ENSP00000261245	0	0	0	0	0	0.999	0.9	0.763	0.999
TUBB2A	TUBA4A	1857206	1843912	9606.ENSP00000369703	9606.ENSP00000248437	0	0	0	0.918	0	0.995	0.9	0.887	0.999
TP53	EP300	1846083	1845316	9606.ENSP00000269305	9606.ENSP00000263253	0	0	0	0	0	0.999	0.9	0.961	0.999
GATAD2A	MTA2	1853731	1846587	9606.ENSP00000351552	9606.ENSP00000278823	0	0	0	0	0	0.999	0.9	0.599	0.999
TAF8	TAF11	1855796	1854176	9606.ENSP00000362068	9606.ENSP00000354633	0	0	0	0	0	0.999	0.9	0.865	0.999
TAF5	TAF13	1855115	1854288	9606.ENSP00000358854	9606.ENSP00000355051	0	0	0	0	0	0.999	0.9	0.82	0.999
TP53	SIRT1	1846083	1842473	9606.ENSP00000269305	9606.ENSP00000212015	0	0	0	0	0	0.999	0.9	0.943	0.999
CDK1	CCNB2	1858283	1847117	9606.ENSP00000378699	9606.ENSP00000288207	0	0	0	0	0	0.927	0.9	0.984	0.999
RELA	NFKB1	1858923	1843094	9606.ENSP00000384273	9606.ENSP00000226574	0	0	0	0.797	0	0.999	0.9	0.985	0.999
EP400	KAT5	1857832	1852315	9606.ENSP00000374212	9606.ENSP00000340330	0	0	0	0	0	0.975	0.9	0.765	0.999
PSMA7	PSMA4	1855365	1842214	9606.ENSP00000359910	9606.ENSP00000044462	0	0	0	0.867	0	0.999	0.9	0.708	0.999
TAF1	TBP	1846471	1843249	9606.ENSP00000276072	9606.ENSP00000230354	0	0	0	0	0	0.999	0.9	0.939	0.999
GTF2B	TBP	1855275	1843249	9606.ENSP00000359531	9606.ENSP00000230354	0	0	0	0	0	0.999	0.9	0.998	0.999
EIF3F	EIF3K	1849251	1843908	9606.ENSP00000310040	9606.ENSP00000248342	0	0	0	0	0	0.999	0.9	0.497	0.999
RBBP4	MTA2	1855919	1846587	9606.ENSP00000362592	9606.ENSP00000278823	0	0	0	0	0	0.999	0.9	0.832	0.999
TAF8	TAF5	1855796	1855115	9606.ENSP00000362068	9606.ENSP00000358854	0	0	0	0	0	0.999	0.9	0.739	0.999
TAF6	TAF11	1860193	1854176	9606.ENSP00000399982	9606.ENSP00000354633	0	0	0	0	0	0.999	0.9	0.872	0.999
CDK2	CCNB1	1845906	1844435	9606.ENSP00000266970	9606.ENSP00000256442	0	0	0	0	0	0.999	0.9	0.951	0.999
AFF1	MLLT1	1858274	1844149	9606.ENSP00000378578	9606.ENSP00000252674	0	0	0	0	0	0.986	0	0.947	0.999
PSMA6	PSMA4	1844920	1842214	9606.ENSP00000261479	9606.ENSP00000044462	0	0	0	0.835	0	0.999	0.9	0.535	0.999
HDAC2	RBBP4	1861837	1855919	9606.ENSP00000430432	9606.ENSP00000362592	0	0	0	0	0	0.999	0.9	0.919	0.999
POLR2A	POLR2B	1849743	1849572	9606.ENSP00000314949	9606.ENSP00000312735	0	0	0	0	0	0.999	0.9	0.972	0.999
CDK9	MLLT1	1855868	1844149	9606.ENSP00000362361	9606.ENSP00000252674	0	0	0	0	0	0.997	0	0.85	0.999
TAF2	TAF5	1856824	1855115	9606.ENSP00000367406	9606.ENSP00000358854	0	0	0	0	0	0.999	0.9	0.885	0.999
PSMA7	PSMB6	1855365	1846162	9606.ENSP00000359910	9606.ENSP00000270586	0	0	0	0	0	0.997	0.9	0.64	0.999
ACTL6A	SMARCC2	1860014	1845915	9606.ENSP00000397552	9606.ENSP00000267064	0	0	0	0	0	0.995	0.9	0.818	0.999
CDK2	RBL2	1845906	1845071	9606.ENSP00000266970	9606.ENSP00000262133	0	0	0	0	0	0.99	0.9	0.863	0.999
ERCC2	ERCC3	1857962	1846961	9606.ENSP00000375809	9606.ENSP00000285398	0	0	0	0	0	0.999	0.9	0.994	0.999
SMARCA4	SMARCC2	1853627	1845915	9606.ENSP00000350720	9606.ENSP00000267064	0	0	0	0	0	0.999	0.9	0.93	0.999
SMC3	PDS5B	1854200	1849657	9606.ENSP00000354720	9606.ENSP00000313851	0	0	0	0	0	0.991	0.9	0.709	0.999
TAF13	TAF10	1854288	1848061	9606.ENSP00000355051	9606.ENSP00000299424	0	0	0	0	0	0.999	0.9	0.935	0.999
GATAD2A	MBD3	1853731	1842265	9606.ENSP00000351552	9606.ENSP00000156825	0	0	0	0	0	0.998	0.9	0.118	0.999
TAF6	TAF7	1860193	1849570	9606.ENSP00000399982	9606.ENSP00000312709	0	0	0	0	0	0.999	0.9	0.864	0.999
PSMB3	PSMA4	1843022	1842214	9606.ENSP00000225426	9606.ENSP00000044462	0	0	0	0	0	0.998	0.9	0.643	0.999
HDAC2	SIN3A	1861837	1854005	9606.ENSP00000430432	9606.ENSP00000353622	0	0	0	0	0	0.999	0.9	0.955	0.999
GATAD2A	CHD4	1853731	1853454	9606.ENSP00000351552	9606.ENSP00000349508	0	0	0	0	0	0.999	0.9	0.899	0.999
JUN	EP300	1855436	1845316	9606.ENSP00000360266	9606.ENSP00000263253	0	0	0	0	0	0.996	0.9	0.78	0.999
PSMB5	PSMA2	1854354	1842974	9606.ENSP00000355325	9606.ENSP00000223321	0	0	0	0	0	0.999	0.9	0.745	0.999
TUBB2A	TUBA1A	1857206	1848244	9606.ENSP00000369703	9606.ENSP00000301071	0	0	0	0.918	0	0.992	0.9	0.843	0.999
TAF2	TAF12	1856824	1845448	9606.ENSP00000367406	9606.ENSP00000263974	0	0	0	0	0	0.999	0.9	0.86	0.999
RELA	NFKBIA	1858923	1842621	9606.ENSP00000384273	9606.ENSP00000216797	0	0	0	0	0	0.999	0.9	0.985	0.999
JUN	CREBBP	1855436	1845124	9606.ENSP00000360266	9606.ENSP00000262367	0	0	0	0	0	0.992	0.9	0.766	0.999
HDAC1	SAP30	1855935	1847743	9606.ENSP00000362649	9606.ENSP00000296504	0	0	0	0	0	0.999	0.9	0.609	0.999
NFKB1	NFKBIA	1843094	1842621	9606.ENSP00000226574	9606.ENSP00000216797	0	0	0	0.783	0	0.999	0.9	0.961	0.999
HDAC2	HDAC1	1861837	1855935	9606.ENSP00000430432	9606.ENSP00000362649	0	0	0	0.984	0	0.999	0.9	0.979	0.999
POLR2A	TBP	1849743	1843249	9606.ENSP00000314949	9606.ENSP00000230354	0	0	0	0	0	0.99	0.9	0.832	0.999
ARID1A	SMARCC2	1850249	1845915	9606.ENSP00000320485	9606.ENSP00000267064	0	0	0	0	0	0.997	0.9	0.743	0.999
PSMA2	PSMA4	1842974	1842214	9606.ENSP00000223321	9606.ENSP00000044462	0	0	0	0.871	0	0.999	0.9	0.872	0.999
RBBP7	GATAD2A	1857150	1853731	9606.ENSP00000369424	9606.ENSP00000351552	0	0	0	0	0	0.999	0.9	0.558	0.999
ACTL6A	RUVBL1	1860014	1850035	9606.ENSP00000397552	9606.ENSP00000318297	0	0	0	0	0	0.998	0.9	0.967	0.999
TAF6	TAF10	1860193	1848061	9606.ENSP00000399982	9606.ENSP00000299424	0	0	0	0	0	0.999	0.9	0.888	0.999
GTF2H1	CCNH	1845828	1844473	9606.ENSP00000265963	9606.ENSP00000256897	0	0	0	0	0	0.996	0.9	0.66	0.999
RBBP4	SIN3A	1855919	1854005	9606.ENSP00000362592	9606.ENSP00000353622	0	0	0	0	0	0.994	0.9	0.891	0.999
TAF10	TBP	1848061	1843249	9606.ENSP00000299424	9606.ENSP00000230354	0	0	0	0	0	0.999	0.9	0.862	0.999
REL	NFKBIA	1847519	1842621	9606.ENSP00000295025	9606.ENSP00000216797	0	0	0	0	0	0.989	0	0.985	0.999
PSMA6	PSMB3	1844920	1843022	9606.ENSP00000261479	9606.ENSP00000225426	0	0	0	0	0	0.999	0.9	0.653	0.999
TAF6	TAF13	1860193	1854288	9606.ENSP00000399982	9606.ENSP00000355051	0	0	0	0	0	0.983	0.9	0.851	0.999
GTF2H3	ERCC2	1862288	1857962	9606.ENSP00000445162	9606.ENSP00000375809	0	0	0	0	0	0.99	0.9	0.586	0.999
TAF7	TAF9	1849570	1842675	9606.ENSP00000312709	9606.ENSP00000217893	0	0	0	0	0	0.999	0.9	0.716	0.999
ORC4	MCM3	1845494	1843226	9606.ENSP00000264169	9606.ENSP00000229854	0	0	0	0	0	0.981	0.9	0.645	0.999
EIF3A	EIF3E	1854958	1842805	9606.ENSP00000358140	9606.ENSP00000220849	0	0	0	0	0	0.999	0.9	0.706	0.999
SP1	EP300	1851138	1845316	9606.ENSP00000329357	9606.ENSP00000263253	0	0	0	0	0	0.999	0.9	0.519	0.999
CDK9	POLR2A	1855868	1849743	9606.ENSP00000362361	9606.ENSP00000314949	0	0	0	0	0	0.999	0.9	0.978	0.999
RUVBL2	ACTL6A	1864926	1860014	9606.ENSP00000473172	9606.ENSP00000397552	0	0	0	0	0	0.991	0.9	0.715	0.999
RUVBL2	EP400	1864926	1857832	9606.ENSP00000473172	9606.ENSP00000374212	0	0	0	0	0	0.997	0.9	0.678	0.999
ERCC3	GTF2H1	1846961	1845828	9606.ENSP00000285398	9606.ENSP00000265963	0	0	0	0	0	0.999	0.9	0.85	0.999
MLL	WDR5	1862045	1853715	9606.ENSP00000436786	9606.ENSP00000351446	0	0	0	0	0	0.982	0.9	0.755	0.999
TAF10	TAF4	1848061	1844180	9606.ENSP00000299424	9606.ENSP00000252996	0	0	0	0	0	0.999	0.9	0.863	0.999
RUVBL2	YEATS4	1864926	1843878	9606.ENSP00000473172	9606.ENSP00000247843	0	0	0	0	0	0.972	0.9	0.678	0.999
SMC4	SMC2	1852454	1847012	9606.ENSP00000341382	9606.ENSP00000286398	0	0	0	0.624	0	0.999	0.9	0.994	0.999
ETS1	JUN	1858032	1855436	9606.ENSP00000376436	9606.ENSP00000360266	0	0	0	0	0	0.826	0.9	0.975	0.999
PSMB5	PSMB3	1854354	1843022	9606.ENSP00000355325	9606.ENSP00000225426	0	0	0	0.674	0	0.999	0.9	0.813	0.999
HDAC2	TP53	1861837	1846083	9606.ENSP00000430432	9606.ENSP00000269305	0	0	0	0	0	0.999	0	0.582	0.999
H2AFX	PRKDC	1856252	1849621	9606.ENSP00000364310	9606.ENSP00000313420	0	0	0	0	0	0.983	0	0.973	0.999
HDAC1	RBBP4	1855935	1855919	9606.ENSP00000362649	9606.ENSP00000362592	0	0	0	0	0	0.999	0.9	0.915	0.999
TAF5	TBP	1855115	1843249	9606.ENSP00000358854	9606.ENSP00000230354	0	0	0	0	0	0.999	0.9	0.835	0.999
TAF3	TAF10	1852303	1848061	9606.ENSP00000340271	9606.ENSP00000299424	0	0	0	0	0	0.999	0.9	0.743	0.999
HDAC2	SP1	1861837	1851138	9606.ENSP00000430432	9606.ENSP00000329357	0	0	0	0	0	0.999	0.9	0.427	0.999
ERCC2	CCNH	1857962	1844473	9606.ENSP00000375809	9606.ENSP00000256897	0	0	0	0	0	0.999	0.9	0.951	0.999
EIF3B	EIF3F	1854079	1849251	9606.ENSP00000354125	9606.ENSP00000310040	0	0	0	0	0	0.999	0.9	0.693	0.999
KPNB1	RANBP2	1847208	1846837	9606.ENSP00000290158	9606.ENSP00000283195	0	0	0	0	0	0.995	0.9	0.798	0.999
RBBP7	CHD4	1857150	1853454	9606.ENSP00000369424	9606.ENSP00000349508	0	0	0	0	0	0.992	0.9	0.839	0.999
HDAC2	GATAD2A	1861837	1853731	9606.ENSP00000430432	9606.ENSP00000351552	0	0	0	0	0	0.995	0.9	0.271	0.999
ORC5	MCM3	1847866	1843226	9606.ENSP00000297431	9606.ENSP00000229854	0	0	0	0	0	0.992	0.9	0.699	0.999
CDK1	CCNB1	1858283	1844435	9606.ENSP00000378699	9606.ENSP00000256442	0	0	0	0	0	0.999	0.9	0.994	0.999
TP53	CREBBP	1846083	1845124	9606.ENSP00000269305	9606.ENSP00000262367	0	0	0	0	0	0.999	0.9	0.939	0.999
RAN	RANBP2	1857999	1846837	9606.ENSP00000376176	9606.ENSP00000283195	0	0	0	0	0	0.998	0.9	0.787	0.999
HDAC2	YY1	1861837	1845097	9606.ENSP00000430432	9606.ENSP00000262238	0	0	0	0	0	0.991	0.9	0.881	0.999
HDAC2	SMARCA4	1861837	1853627	9606.ENSP00000430432	9606.ENSP00000350720	0	0	0	0	0	0.996	0	0.801	0.999
PSMB1	PSMA2	1845087	1842974	9606.ENSP00000262193	9606.ENSP00000223321	0	0	0	0	0	0.999	0.9	0.885	0.999
TAF6	TAF4	1860193	1844180	9606.ENSP00000399982	9606.ENSP00000252996	0	0	0	0	0	0.999	0.9	0.938	0.999
SMARCA4	SMARCB1	1853627	1845291	9606.ENSP00000350720	9606.ENSP00000263121	0	0	0	0	0	0.999	0.9	0.988	0.999
CDK9	LARP7	1855868	1849695	9606.ENSP00000362361	9606.ENSP00000314311	0	0	0	0	0	0.993	0	0.946	0.999
XPO1	RAN	1858987	1857999	9606.ENSP00000384863	9606.ENSP00000376176	0	0	0	0	0	0.997	0.9	0.828	0.999
RBBP7	RBBP4	1857150	1855919	9606.ENSP00000369424	9606.ENSP00000362592	0	0	0	0.988	0	0.993	0.9	0.809	0.999
TAF7	TAF12	1849570	1845448	9606.ENSP00000312709	9606.ENSP00000263974	0	0	0	0	0	0.999	0.9	0.867	0.999
KAT5	TP53	1852315	1846083	9606.ENSP00000340330	9606.ENSP00000269305	0	0	0	0	0	0.992	0.9	0.912	0.999
ARID1A	SMARCA2	1850249	1845805	9606.ENSP00000320485	9606.ENSP00000265773	0	0	0	0	0	0.999	0.9	0.636	0.999
TAF6	TAF5	1860193	1855115	9606.ENSP00000399982	9606.ENSP00000358854	0	0	0	0	0	0.999	0.9	0.916	0.999
GRIN1	GRIN2A	1855505	1851485	9606.ENSP00000360608	9606.ENSP00000332549	0	0	0	0.718	0	0.991	0.9	0.974	0.999
MYC	EP300	1856789	1845316	9606.ENSP00000367207	9606.ENSP00000263253	0	0	0	0	0	0.983	0.9	0.847	0.999
XRCC5	PRKDC	1857983	1849621	9606.ENSP00000375977	9606.ENSP00000313420	0	0	0	0	0	0.999	0.9	0.991	0.999
TAF1	TAF9	1846471	1842675	9606.ENSP00000276072	9606.ENSP00000217893	0	0	0	0	0	0.999	0.9	0.748	0.999
CTDP1	MED6	1848076	1844426	9606.ENSP00000299543	9606.ENSP00000256379	0	0	0	0	0	0.999	0	0.106	0.999
PSMB10	PSMB3	1853696	1843022	9606.ENSP00000351314	9606.ENSP00000225426	0	0	0	0	0	0.999	0.9	0.601	0.999
PRKDC	TP53	1849621	1846083	9606.ENSP00000313420	9606.ENSP00000269305	0	0	0	0	0	0.996	0.9	0.972	0.999
GRB2	FRS2	1852164	1848041	9606.ENSP00000339007	9606.ENSP00000299293	0	0	0	0	0	0.999	0.9	0.946	0.999
WHSC2	TH1L	1857584	1852578	9606.ENSP00000372335	9606.ENSP00000342300	0	0	0	0	0	0.874	0.9	0.962	0.999
RELA	HDAC1	1858923	1855935	9606.ENSP00000384273	9606.ENSP00000362649	0	0	0	0	0	0.999	0	0.599	0.999
TAF6L	TAF9	1847468	1842675	9606.ENSP00000294168	9606.ENSP00000217893	0	0	0	0	0	0.967	0.9	0.767	0.999
PSMB10	PSMB1	1853696	1845087	9606.ENSP00000351314	9606.ENSP00000262193	0	0	0	0	0	0.984	0.9	0.722	0.999
TAF11	TAF10	1854176	1848061	9606.ENSP00000354633	9606.ENSP00000299424	0	0	0	0	0	0.999	0.9	0.925	0.999
SMC2	NCAPH	1847012	1843566	9606.ENSP00000286398	9606.ENSP00000240423	0	0	0	0	0	0.999	0.9	0.863	0.999
PSMB5	PSMA4	1854354	1842214	9606.ENSP00000355325	9606.ENSP00000044462	0	0	0	0	0	0.999	0.9	0.58	0.999
HDAC2	RELA	1861837	1858923	9606.ENSP00000430432	9606.ENSP00000384273	0	0	0	0	0	0.999	0.9	0.522	0.999
CHD4	MTA2	1853454	1846587	9606.ENSP00000349508	9606.ENSP00000278823	0	0	0	0	0	0.999	0.9	0.81	0.999
TAF11	TAF7	1854176	1849570	9606.ENSP00000354633	9606.ENSP00000312709	0	0	0	0	0	0.999	0.9	0.97	0.999
PSMA7	PSMB7	1855365	1844696	9606.ENSP00000359910	9606.ENSP00000259457	0	0	0	0	0	0.997	0.9	0.671	0.999
TAF13	TAF12	1854288	1845448	9606.ENSP00000355051	9606.ENSP00000263974	0	0	0	0	0	0.95	0.9	0.914	0.999
PSMB5	PSMA6	1854354	1844920	9606.ENSP00000355325	9606.ENSP00000261479	0	0	0	0	0	0.998	0.9	0.671	0.999
GTF2B	POLR2A	1855275	1849743	9606.ENSP00000359531	9606.ENSP00000314949	0	0	0	0	0	0.997	0.9	0.856	0.999
TAF2	TAF4	1856824	1844180	9606.ENSP00000367406	9606.ENSP00000252996	0	0	0	0	0	0.999	0.9	0.861	0.999
SP1	SP3	1851138	1849281	9606.ENSP00000329357	9606.ENSP00000310301	0	0	0	0.845	0	0.996	0.9	0.566	0.999
CXXC1	WDR5	1859496	1853715	9606.ENSP00000390475	9606.ENSP00000351446	0	0	0	0	0	0.997	0.9	0.847	0.999
RUVBL1	YEATS4	1850035	1843878	9606.ENSP00000318297	9606.ENSP00000247843	0	0	0	0	0	0.978	0.9	0.675	0.999
SMARCC2	SMARCB1	1845915	1845291	9606.ENSP00000267064	9606.ENSP00000263121	0	0	0	0	0	0.999	0.9	0.917	0.999
RBBP7	MTA2	1857150	1846587	9606.ENSP00000369424	9606.ENSP00000278823	0	0	0	0	0	0.999	0.9	0.87	0.999
NUP93	NUP205	1849329	1846987	9606.ENSP00000310668	9606.ENSP00000285968	0	0	0	0	0	0.988	0.9	0.983	0.999
PSMB1	PSMA4	1845087	1842214	9606.ENSP00000262193	9606.ENSP00000044462	0	0	0	0	0	0.999	0.9	0.739	0.999
TAF4	TAF9	1844180	1842675	9606.ENSP00000252996	9606.ENSP00000217893	0	0	0	0	0	0.999	0.9	0.785	0.999
TAF5	TAF9	1855115	1842675	9606.ENSP00000358854	9606.ENSP00000217893	0	0	0	0	0	0.999	0.9	0.797	0.999
TAF8	TAF13	1855796	1854288	9606.ENSP00000362068	9606.ENSP00000355051	0	0	0	0	0	0.995	0.9	0.754	0.999
GTF3C4	GTF3C5	1855629	1855620	9606.ENSP00000361219	9606.ENSP00000361180	0	0	0	0	0	0.989	0.9	0.86	0.999
PSMB5	PSMB7	1854354	1844696	9606.ENSP00000355325	9606.ENSP00000259457	0	0	0	0.721	0	0.999	0.9	0.875	0.999
PSMB6	PSMB7	1846162	1844696	9606.ENSP00000270586	9606.ENSP00000259457	0	0	0	0.775	0	0.999	0.9	0.883	0.999
TAF8	TAF7	1855796	1849570	9606.ENSP00000362068	9606.ENSP00000312709	0	0	0	0	0	0.999	0.9	0.757	0.999
HDAC1	SMARCA4	1855935	1853627	9606.ENSP00000362649	9606.ENSP00000350720	0	0	0	0	0	0.96	0.9	0.81	0.999
POLR2A	CTDP1	1849743	1848076	9606.ENSP00000314949	9606.ENSP00000299543	0	0	0	0	0	0.999	0.9	0.866	0.999
PSMA7	PSMA6	1855365	1844920	9606.ENSP00000359910	9606.ENSP00000261479	0	0	0	0.833	0	0.999	0.9	0.464	0.999
PSMB10	PSMA2	1853696	1842974	9606.ENSP00000351314	9606.ENSP00000223321	0	0	0	0	0	0.999	0.72	0.589	0.999
DMAP1	YEATS4	1849566	1843878	9606.ENSP00000312697	9606.ENSP00000247843	0	0	0	0	0	0.974	0.9	0.979	0.999
SMARCC2	SMARCA2	1845915	1845805	9606.ENSP00000267064	9606.ENSP00000265773	0	0	0	0	0	0.999	0.9	0.922	0.999
SNRNP200	PRPF8	1849929	1848629	9606.ENSP00000317123	9606.ENSP00000304350	0	0	0	0	0	0.999	0.9	0.869	0.999
MAX	MXI1	1853721	1851315	9606.ENSP00000351490	9606.ENSP00000331152	0	0	0	0	0	0.999	0	0.575	0.999
TAF11	TAF12	1854176	1845448	9606.ENSP00000354633	9606.ENSP00000263974	0	0	0	0	0	0.999	0.9	0.989	0.999
TAF8	TAF10	1855796	1848061	9606.ENSP00000362068	9606.ENSP00000299424	0	0	0	0	0	0.999	0.9	0.906	0.999
TAF5	TAF7	1855115	1849570	9606.ENSP00000358854	9606.ENSP00000312709	0	0	0	0	0	0.999	0.9	0.86	0.999
CDK9	AFF4	1855868	1845731	9606.ENSP00000362361	9606.ENSP00000265343	0	0	0	0	0	0.999	0	0.472	0.999
TAF2	TAF11	1856824	1854176	9606.ENSP00000367406	9606.ENSP00000354633	0	0	0	0	0	0.999	0.9	0.827	0.999
SMC4	NCAPD2	1852454	1850703	9606.ENSP00000341382	9606.ENSP00000325017	0	0	0	0	0	0.999	0.9	0.972	0.999
ERCC2	MNAT1	1857962	1844871	9606.ENSP00000375809	9606.ENSP00000261245	0	0	0	0	0	0.999	0.9	0.705	0.999
KAT5	RUVBL1	1852315	1850035	9606.ENSP00000340330	9606.ENSP00000318297	0	0	0	0	0	0.981	0.9	0.765	0.999
JUN	EGR1	1855436	1843543	9606.ENSP00000360266	9606.ENSP00000239938	0	0	0	0	0	0.602	0.9	0.983	0.999
TAF6	TAF12	1860193	1845448	9606.ENSP00000399982	9606.ENSP00000263974	0	0	0	0	0	0.999	0.9	0.989	0.999
TAF6	TAF9	1860193	1842675	9606.ENSP00000399982	9606.ENSP00000217893	0	0	0	0	0	0.999	0.9	0.99	0.999
HDAC1	SP1	1855935	1851138	9606.ENSP00000362649	9606.ENSP00000329357	0	0	0	0	0	0.999	0.9	0.554	0.999
ERCC3	CCNH	1846961	1844473	9606.ENSP00000285398	9606.ENSP00000256897	0	0	0	0	0	0.998	0.9	0.762	0.999
TAF1	TAF12	1846471	1845448	9606.ENSP00000276072	9606.ENSP00000263974	0	0	0	0	0	0.999	0.9	0.818	0.999
NOP56	FBL	1857348	1842861	9606.ENSP00000370589	9606.ENSP00000221801	0	0	0	0	0	0.99	0	0.92	0.999
ORC5	ORC4	1847866	1845494	9606.ENSP00000297431	9606.ENSP00000264169	0	0	0	0	0	0.999	0.9	0.986	0.999
SMC3	PDS5A	1854200	1848529	9606.ENSP00000354720	9606.ENSP00000303427	0	0	0	0	0	0.995	0.9	0.915	0.999
HDAC1	EP300	1855935	1845316	9606.ENSP00000362649	9606.ENSP00000263253	0	0	0	0	0	0.99	0.9	0.899	0.999
MNAT1	CCNH	1844871	1844473	9606.ENSP00000261245	9606.ENSP00000256897	0	0	0	0	0	0.999	0.9	0.716	0.999
KAT2B	CREBBP	1845408	1845124	9606.ENSP00000263754	9606.ENSP00000262367	0	0	0	0	0	0.991	0.9	0.949	0.999
HDAC2	SAP30	1861837	1847743	9606.ENSP00000430432	9606.ENSP00000296504	0	0	0	0	0	0.998	0.9	0.68	0.999
CDK2	MCM3	1845906	1843226	9606.ENSP00000266970	9606.ENSP00000229854	0	0	0	0	0	0.954	0.9	0.972	0.999
PSMB3	PSMA2	1843022	1842974	9606.ENSP00000225426	9606.ENSP00000223321	0	0	0	0	0	0.999	0.9	0.685	0.999
TAF2	TAF1	1856824	1846471	9606.ENSP00000367406	9606.ENSP00000276072	0	0	0	0	0	0.999	0.72	0.953	0.999
HDAC1	SIN3A	1855935	1854005	9606.ENSP00000362649	9606.ENSP00000353622	0	0	0	0	0	0.999	0.9	0.959	0.999
TAF6	TAF2	1860193	1856824	9606.ENSP00000399982	9606.ENSP00000367406	0	0	0	0	0	0.999	0.9	0.872	0.999
CREB1	EP300	1859295	1845316	9606.ENSP00000387699	9606.ENSP00000263253	0	0	0	0	0	0.996	0.9	0.99	0.999
ALYREF	THOC1	1861534	1844947	9606.ENSP00000421592	9606.ENSP00000261600	0	0	0	0	0	0.999	0.9	0.618	0.999
CREB1	CREBBP	1859295	1845124	9606.ENSP00000387699	9606.ENSP00000262367	0	0	0	0	0	0.999	0.9	0.992	0.999
CDK9	CCNT2	1855868	1845488	9606.ENSP00000362361	9606.ENSP00000264157	0	0	0	0	0	0.999	0.9	0.942	0.999
PSMA7	PSMB5	1855365	1854354	9606.ENSP00000359910	9606.ENSP00000355325	0	0	0	0	0	0.986	0.9	0.621	0.999
CCNB2	CDK2	1847117	1845906	9606.ENSP00000288207	9606.ENSP00000266970	0	0	0	0	0	0.957	0.9	0.884	0.999
PSMB2	PSMA7	1855861	1855365	9606.ENSP00000362334	9606.ENSP00000359910	0	0	0	0	0	0.998	0.9	0.726	0.999
TAF13	TAF4	1854288	1844180	9606.ENSP00000355051	9606.ENSP00000252996	0	0	0	0	0	0.998	0.9	0.859	0.999
PSMB7	PSMA2	1844696	1842974	9606.ENSP00000259457	9606.ENSP00000223321	0	0	0	0	0	0.999	0.9	0.557	0.999
RBBP7	MBD3	1857150	1842265	9606.ENSP00000369424	9606.ENSP00000156825	0	0	0	0	0	0.989	0.9	0.564	0.999
TAF10	TAF6L	1848061	1847468	9606.ENSP00000299424	9606.ENSP00000294168	0	0	0	0	0	0.975	0.9	0.751	0.999
XRCC5	XRCC6	1857983	1853821	9606.ENSP00000375977	9606.ENSP00000352257	0	0	0	0	0	0.999	0.9	0.996	0.999
TAF4	TBP	1844180	1843249	9606.ENSP00000252996	9606.ENSP00000230354	0	0	0	0	0	0.999	0.9	0.914	0.999
RDBP	COBRA1	1856295	1852223	9606.ENSP00000364578	9606.ENSP00000339495	0	0	0	0	0	0.944	0.9	0.868	0.999
MNAT1	CDK7	1844871	1844436	9606.ENSP00000261245	9606.ENSP00000256443	0	0	0	0	0	0.924	0.9	0.9	0.999
PSMB5	PSMB6	1854354	1846162	9606.ENSP00000355325	9606.ENSP00000270586	0	0	0	0.759	0	0.999	0.9	0.912	0.999
EP300	YY1	1845316	1845097	9606.ENSP00000263253	9606.ENSP00000262238	0	0	0	0	0	0.992	0.9	0.68	0.999
TAF5	TAF11	1855115	1854176	9606.ENSP00000358854	9606.ENSP00000354633	0	0	0	0	0	0.999	0.9	0.818	0.999
HDAC1	CHD4	1855935	1853454	9606.ENSP00000362649	9606.ENSP00000349508	0	0	0	0	0	0.999	0.9	0.847	0.999
GTF2H3	ERCC3	1862288	1846961	9606.ENSP00000445162	9606.ENSP00000285398	0	0	0	0	0	0.999	0.9	0.719	0.999
SSRP1	SUPT16H	1846565	1842582	9606.ENSP00000278412	9606.ENSP00000216297	0	0	0	0	0	0.999	0.9	0.907	0.999
SMARCA4	ARID1A	1853627	1850249	9606.ENSP00000350720	9606.ENSP00000320485	0	0	0	0	0	0.999	0.9	0.934	0.999
ERCC3	MNAT1	1846961	1844871	9606.ENSP00000285398	9606.ENSP00000261245	0	0	0	0	0	0.999	0.9	0.68	0.999
XRCC6	PRKDC	1853821	1849621	9606.ENSP00000352257	9606.ENSP00000313420	0	0	0	0	0	0.999	0.9	0.991	0.999
TAF3	TBP	1852303	1843249	9606.ENSP00000340271	9606.ENSP00000230354	0	0	0	0	0	0.999	0.9	0.575	0.999
EIF3B	EIF3K	1854079	1843908	9606.ENSP00000354125	9606.ENSP00000248342	0	0	0	0	0	0.995	0.9	0.48	0.999
TAF7	TBP	1849570	1843249	9606.ENSP00000312709	9606.ENSP00000230354	0	0	0	0	0	0.999	0.9	0.913	0.999
HIST1H1B	CDK2	1851214	1845906	9606.ENSP00000330074	9606.ENSP00000266970	0	0	0	0	0	0.999	0	0.831	0.999
TAF7	TAF4	1849570	1844180	9606.ENSP00000312709	9606.ENSP00000252996	0	0	0	0	0	0.999	0.9	0.87	0.999
PSMB5	PSMB1	1854354	1845087	9606.ENSP00000355325	9606.ENSP00000262193	0	0	0	0.657	0	0.999	0.9	0.767	0.999
TAF8	TAF12	1855796	1845448	9606.ENSP00000362068	9606.ENSP00000263974	0	0	0	0	0	0.999	0.9	0.855	0.999
HDAC1	MTA1	1855935	1851603	9606.ENSP00000362649	9606.ENSP00000333633	0	0	0	0	0	0.999	0.9	0.727	0.999
GTF2B	CREBBP	1855275	1845124	9606.ENSP00000359531	9606.ENSP00000262367	0	0	0	0	0	0.962	0.9	0.908	0.999
PSMB2	PSMA4	1855861	1842214	9606.ENSP00000362334	9606.ENSP00000044462	0	0	0	0	0	0.998	0.9	0.73	0.999
TAF2	TBP	1856824	1843249	9606.ENSP00000367406	9606.ENSP00000230354	0	0	0	0	0	0.999	0.9	0.916	0.999
HDAC2	MTA1	1861837	1851603	9606.ENSP00000430432	9606.ENSP00000333633	0	0	0	0	0	0.999	0.9	0.726	0.999
TP53	CDK2	1846083	1845906	9606.ENSP00000269305	9606.ENSP00000266970	0	0	0	0	0	0.982	0.9	0.979	0.999
RBBP4	CHD4	1855919	1853454	9606.ENSP00000362592	9606.ENSP00000349508	0	0	0	0	0	0.995	0.9	0.76	0.999
MYC	KAT5	1856789	1852315	9606.ENSP00000367207	9606.ENSP00000340330	0	0	0	0	0	0.942	0.9	0.889	0.999
CDK1	BIRC5	1858283	1848314	9606.ENSP00000378699	9606.ENSP00000301633	0	0	0	0	0	0.807	0.9	0.974	0.999
RELA	EP300	1858923	1845316	9606.ENSP00000384273	9606.ENSP00000263253	0	0	0	0	0	0.999	0.9	0.84	0.999
CDK2	CCNH	1845906	1844473	9606.ENSP00000266970	9606.ENSP00000256897	0	0	0	0	0	0.997	0.9	0.849	0.999
GRB2	KHDRBS1	1852164	1849655	9606.ENSP00000339007	9606.ENSP00000313829	0	0	0	0	0	0.999	0	0.897	0.999
ITGB1	ITGA5	1848520	1847411	9606.ENSP00000303351	9606.ENSP00000293379	0	0	0	0	0	0.999	0.9	0.918	0.999
RBBP4	GATAD2A	1855919	1853731	9606.ENSP00000362592	9606.ENSP00000351552	0	0	0	0	0	0.984	0.9	0.558	0.999
HDAC2	MBD3	1861837	1842265	9606.ENSP00000430432	9606.ENSP00000156825	0	0	0	0	0	0.999	0.9	0.169	0.999
TAF2	TAF9	1856824	1842675	9606.ENSP00000367406	9606.ENSP00000217893	0	0	0	0	0	0.999	0.9	0.73	0.999
SMC4	NCAPH	1852454	1843566	9606.ENSP00000341382	9606.ENSP00000240423	0	0	0	0	0	0.999	0.9	0.845	0.999
TAF12	TAF9	1845448	1842675	9606.ENSP00000263974	9606.ENSP00000217893	0	0	0	0	0	0.999	0.9	0.84	0.999
RUVBL2	DMAP1	1864926	1849566	9606.ENSP00000473172	9606.ENSP00000312697	0	0	0	0	0	0.999	0.9	0.72	0.999
PSMB7	PSMA4	1844696	1842214	9606.ENSP00000259457	9606.ENSP00000044462	0	0	0	0	0	0.999	0.9	0.488	0.999
GTF2H3	MNAT1	1862288	1844871	9606.ENSP00000445162	9606.ENSP00000261245	0	0	0	0	0	0.999	0.9	0.724	0.999
CDK2	CCNE1	1845906	1845190	9606.ENSP00000266970	9606.ENSP00000262643	0	0	0	0	0	0.999	0.9	0.987	0.999
SETD7	TP53	1846356	1846083	9606.ENSP00000274031	9606.ENSP00000269305	0	0	0	0	0	0.925	0.9	0.878	0.999
SMARCA4	SMARCA2	1853627	1845805	9606.ENSP00000350720	9606.ENSP00000265773	0	0	0	0.971	0	0.997	0.9	0.982	0.999
NCL	NPM1	1850027	1847808	9606.ENSP00000318195	9606.ENSP00000296930	0	0	0	0	0	0.99	0.9	0.942	0.999
HDAC1	TP53	1855935	1846083	9606.ENSP00000362649	9606.ENSP00000269305	0	0	0	0	0	0.999	0	0.942	0.999
MED14	MED6	1850574	1844426	9606.ENSP00000323720	9606.ENSP00000256379	0	0	0	0	0	0.978	0.9	0.878	0.999
ACTL6A	ARID1A	1860014	1850249	9606.ENSP00000397552	9606.ENSP00000320485	0	0	0	0	0	0.986	0.9	0.563	0.999
PSMB2	PSMB1	1855861	1845087	9606.ENSP00000362334	9606.ENSP00000262193	0	0	0	0.712	0	0.999	0.9	0.839	0.999
PSMB2	PSMB6	1855861	1846162	9606.ENSP00000362334	9606.ENSP00000270586	0	0	0	0	0	0.985	0.9	0.585	0.999
MED14	CTDP1	1850574	1848076	9606.ENSP00000323720	9606.ENSP00000299543	0	0	0	0	0	0.999	0	0.147	0.999
ACTL6A	SMARCA4	1860014	1853627	9606.ENSP00000397552	9606.ENSP00000350720	0	0	0	0	0	0.999	0.9	0.8	0.999
EIF3F	EIF3E	1849251	1842805	9606.ENSP00000310040	9606.ENSP00000220849	0	0	0	0	0	0.999	0.9	0.785	0.999
MCM6	MCM3	1845487	1843226	9606.ENSP00000264156	9606.ENSP00000229854	0	0	0	0.756	0	0.999	0.9	0.913	0.999
RUVBL1	DMAP1	1850035	1849566	9606.ENSP00000318297	9606.ENSP00000312697	0	0	0	0	0	0.999	0.9	0.709	0.999
ARID1A	SMARCB1	1850249	1845291	9606.ENSP00000320485	9606.ENSP00000263121	0	0	0	0	0	0.997	0.9	0.62	0.999
NCAPD2	SMC2	1850703	1847012	9606.ENSP00000325017	9606.ENSP00000286398	0	0	0	0	0	0.999	0.9	0.973	0.999
HDAC1	GATAD2A	1855935	1853731	9606.ENSP00000362649	9606.ENSP00000351552	0	0	0	0	0	0.996	0.9	0.374	0.999
TAF6	TAF1	1860193	1846471	9606.ENSP00000399982	9606.ENSP00000276072	0	0	0	0	0	0.999	0.9	0.832	0.999
EIF3A	EIF3F	1854958	1849251	9606.ENSP00000358140	9606.ENSP00000310040	0	0	0	0	0	0.999	0.9	0.618	0.999
EIF3A	EIF3K	1854958	1843908	9606.ENSP00000358140	9606.ENSP00000248342	0	0	0	0	0	0.999	0.9	0.35	0.999
TAF10	TAF12	1848061	1845448	9606.ENSP00000299424	9606.ENSP00000263974	0	0	0	0	0	0.999	0.9	0.912	0.999
MTA3	HDAC1	1859013	1855935	9606.ENSP00000385045	9606.ENSP00000362649	0	0	0	0	0	0.98	0.9	0.731	0.999
PSMB6	PSMB3	1846162	1843022	9606.ENSP00000270586	9606.ENSP00000225426	0	0	0	0.689	0	0.999	0.9	0.788	0.999
TAF6	TAF3	1860193	1852303	9606.ENSP00000399982	9606.ENSP00000340271	0	0	0	0	0	0.98	0.9	0.57	0.999
PSMB2	PSMB3	1855861	1843022	9606.ENSP00000362334	9606.ENSP00000225426	0	0	0	0	0	0.999	0.9	0.877	0.999
PSMB2	PSMA2	1855861	1842974	9606.ENSP00000362334	9606.ENSP00000223321	0	0	0	0	0	0.999	0.9	0.757	0.999
HDAC2	MBD2	1861837	1844432	9606.ENSP00000430432	9606.ENSP00000256429	0	0	0	0	0	0.993	0.9	0.394	0.999
HDAC2	MTA2	1861837	1846587	9606.ENSP00000430432	9606.ENSP00000278823	0	0	0	0	0	0.999	0.9	0.76	0.999
PSMB1	PSMA6	1845087	1844920	9606.ENSP00000262193	9606.ENSP00000261479	0	0	0	0	0	0.999	0.9	0.596	0.999
SIN3A	TP53	1854005	1846083	9606.ENSP00000353622	9606.ENSP00000269305	0	0	0	0	0	0.918	0.9	0.925	0.999
PSMA7	PSMA2	1855365	1842974	9606.ENSP00000359910	9606.ENSP00000223321	0	0	0	0.893	0	0.999	0.9	0.709	0.999
PSMB2	PSMB5	1855861	1854354	9606.ENSP00000362334	9606.ENSP00000355325	0	0	0	0	0	0.999	0.9	0.9	0.999
TAF5	TAF4	1855115	1844180	9606.ENSP00000358854	9606.ENSP00000252996	0	0	0	0	0	0.999	0.9	0.88	0.999
EP400	RUVBL1	1857832	1850035	9606.ENSP00000374212	9606.ENSP00000318297	0	0	0	0	0	0.994	0.9	0.722	0.999
PRKRA	EIF2AK2	1850023	1843335	9606.ENSP00000318176	9606.ENSP00000233057	0	0	0	0	0	0.983	0.9	0.918	0.999
KAT2B	EP300	1845408	1845316	9606.ENSP00000263754	9606.ENSP00000263253	0	0	0	0	0	0.984	0.9	0.967	0.999
ACTL6A	SMARCA2	1860014	1845805	9606.ENSP00000397552	9606.ENSP00000265773	0	0	0	0	0	0.999	0.9	0.755	0.999
TAF2	TAF7	1856824	1849570	9606.ENSP00000367406	9606.ENSP00000312709	0	0	0	0	0	0.999	0.9	0.801	0.999
TAF5	TAF1	1855115	1846471	9606.ENSP00000358854	9606.ENSP00000276072	0	0	0	0	0	0.999	0.9	0.79	0.999
TAF7	TAF10	1849570	1848061	9606.ENSP00000312709	9606.ENSP00000299424	0	0	0	0	0	0.999	0.9	0.859	0.999
NFKB2	RELB	1855147	1842834	9606.ENSP00000358983	9606.ENSP00000221452	0	0	0	0.766	0	0.989	0.9	0.974	0.999
TAF5	TAF3	1855115	1852303	9606.ENSP00000358854	9606.ENSP00000340271	0	0	0	0	0	0.993	0.9	0.415	0.999
NCAPG	NCAPH	1844063	1843566	9606.ENSP00000251496	9606.ENSP00000240423	0	0	0	0	0	0.999	0.9	0.965	0.999
BRCA1	TP53	1861387	1846083	9606.ENSP00000418960	9606.ENSP00000269305	0	0	0	0	0	0.999	0.9	0.974	0.999
RBBP7	SAP30	1857150	1847743	9606.ENSP00000369424	9606.ENSP00000296504	0	0	0	0	0	0.985	0.9	0.61	0.999
HDAC1	MTA2	1855935	1846587	9606.ENSP00000362649	9606.ENSP00000278823	0	0	0	0	0	0.999	0.9	0.76	0.999
TAF2	TAF8	1856824	1855796	9606.ENSP00000367406	9606.ENSP00000362068	0	0	0	0	0	0.999	0.9	0.743	0.999
SMARCA4	POLR2A	1853627	1849743	9606.ENSP00000350720	9606.ENSP00000314949	0	0	0	0	0	0.996	0.9	0.567	0.999
MAP2K2	RAF1	1845250	1844086	9606.ENSP00000262948	9606.ENSP00000251849	0	0	0	0.63	0	0.994	0.9	0.859	0.999
SF3B1	SF3B3	1851836	1848773	9606.ENSP00000335321	9606.ENSP00000305790	0	0	0	0	0	0.999	0.9	0.835	0.999
MTA2	MBD3	1846587	1842265	9606.ENSP00000278823	9606.ENSP00000156825	0	0	0	0	0	0.999	0.9	0.897	0.999
HDAC2	CHD4	1861837	1853454	9606.ENSP00000430432	9606.ENSP00000349508	0	0	0	0	0	0.999	0.9	0.852	0.999
TAF11	TBP	1854176	1843249	9606.ENSP00000354633	9606.ENSP00000230354	0	0	0	0	0	0.999	0.9	0.785	0.999
CHD8	WDR5	1858781	1853715	9606.ENSP00000382863	9606.ENSP00000351446	0	0	0	0	0	0.875	0.9	0.94	0.999
EIF3K	EIF3E	1843908	1842805	9606.ENSP00000248342	9606.ENSP00000220849	0	0	0	0	0	0.999	0.9	0.548	0.999
HDAC2	SMARCA5	1861837	1846833	9606.ENSP00000430432	9606.ENSP00000283131	0	0	0	0	0	0.948	0.9	0.848	0.999
ERCC2	GTF2H1	1857962	1845828	9606.ENSP00000375809	9606.ENSP00000265963	0	0	0	0	0	0.997	0.9	0.905	0.999
TAF13	TAF9	1854288	1842675	9606.ENSP00000355051	9606.ENSP00000217893	0	0	0	0	0	0.997	0.9	0.754	0.999
PLK1	CCNB1	1848135	1844435	9606.ENSP00000300093	9606.ENSP00000256442	0	0	0	0	0	0.922	0.9	0.989	0.999
JUN	SP1	1855436	1851138	9606.ENSP00000360266	9606.ENSP00000329357	0	0	0	0	0	0.922	0.9	0.917	0.999
TAF3	TAF4	1852303	1844180	9606.ENSP00000340271	9606.ENSP00000252996	0	0	0	0	0	0.992	0.9	0.646	0.999
RANGAP1	RANBP2	1853317	1846837	9606.ENSP00000348577	9606.ENSP00000283195	0	0	0	0	0	0.996	0.9	0.993	0.999
PSMA7	PSMB1	1855365	1845087	9606.ENSP00000359910	9606.ENSP00000262193	0	0	0	0	0	0.998	0.9	0.589	0.999
GRIN1	GRIN2B	1855505	1846639	9606.ENSP00000360608	9606.ENSP00000279593	0	0	0	0.726	0	0.991	0.9	0.973	0.999
PSMB7	PSMB3	1844696	1843022	9606.ENSP00000259457	9606.ENSP00000225426	0	0	0	0	0	0.999	0.9	0.751	0.999
KPNB1	NUP153	1847208	1845057	9606.ENSP00000290158	9606.ENSP00000262077	0	0	0	0	0	0.998	0.9	0.822	0.999
CREB1	JUN	1859295	1855436	9606.ENSP00000387699	9606.ENSP00000360266	0	0	0	0	0	0.612	0.9	0.978	0.999
SMC4	NCAPG	1852454	1844063	9606.ENSP00000341382	9606.ENSP00000251496	0	0	0	0	0	0.999	0.9	0.81	0.999
TAF11	TAF9	1854176	1842675	9606.ENSP00000354633	9606.ENSP00000217893	0	0	0	0	0	0.999	0.9	0.683	0.999
PSMB1	PSMB7	1845087	1844696	9606.ENSP00000262193	9606.ENSP00000259457	0	0	0	0	0	0.999	0.9	0.746	0.999
ITGB3	ITGAV	1845040	1844842	9606.ENSP00000262017	9606.ENSP00000261023	0	0	0	0	0	0.999	0.9	0.817	0.999
PPP1CA	PPP1R8	1850792	1849448	9606.ENSP00000326031	9606.ENSP00000311677	0	0	0	0	0	0.999	0	0.387	0.999
PSMA7	PSMB3	1855365	1843022	9606.ENSP00000359910	9606.ENSP00000225426	0	0	0	0	0	0.999	0.9	0.668	0.999
RBBP7	HDAC1	1857150	1855935	9606.ENSP00000369424	9606.ENSP00000362649	0	0	0	0	0	0.999	0.9	0.915	0.999
CCNH	CDK7	1844473	1844436	9606.ENSP00000256897	9606.ENSP00000256443	0	0	0	0	0	0.926	0.9	0.997	0.999
EIF3B	EIF3E	1854079	1842805	9606.ENSP00000354125	9606.ENSP00000220849	0	0	0	0	0	0.999	0.9	0.773	0.999
RBBP4	SAP30	1855919	1847743	9606.ENSP00000362592	9606.ENSP00000296504	0	0	0	0	0	0.985	0.9	0.683	0.999
RBBP4	SUZ12	1855919	1849881	9606.ENSP00000362592	9606.ENSP00000316578	0	0	0	0	0	0.99	0.9	0.91	0.999
HIST1H3A	EP300	1853568	1845316	9606.ENSP00000350275	9606.ENSP00000263253	0	0	0	0	0	0.999	0	0.13	0.999
RBBP7	SIN3A	1857150	1854005	9606.ENSP00000369424	9606.ENSP00000353622	0	0	0	0	0	0.967	0.9	0.896	0.999
TAF10	TAF1	1848061	1846471	9606.ENSP00000299424	9606.ENSP00000276072	0	0	0	0	0	0.999	0.9	0.765	0.999
TP53	KAT2B	1846083	1845408	9606.ENSP00000269305	9606.ENSP00000263754	0	0	0	0	0	0.999	0.9	0.963	0.999
HDAC1	NFKB1	1855935	1843094	9606.ENSP00000362649	9606.ENSP00000226574	0	0	0	0	0	0.999	0	0.604	0.999
RAN	RANGAP1	1857999	1853317	9606.ENSP00000376176	9606.ENSP00000348577	0	0	0	0	0	0.997	0.9	0.708	0.999
MYC	MAX	1856789	1853721	9606.ENSP00000367207	9606.ENSP00000351490	0	0	0	0.72	0	0.999	0.9	0.912	0.999
CDK9	CCNT1	1855868	1845024	9606.ENSP00000362361	9606.ENSP00000261900	0	0	0	0	0	0.999	0.9	0.992	0.999
TRRAP	KAT5	1853208	1852315	9606.ENSP00000347733	9606.ENSP00000340330	0	0	0	0	0	0.508	0.9	0.983	0.999
SMARCA2	SMARCB1	1845805	1845291	9606.ENSP00000265773	9606.ENSP00000263121	0	0	0	0	0	0.999	0.9	0.988	0.999
TAF11	TAF4	1854176	1844180	9606.ENSP00000354633	9606.ENSP00000252996	0	0	0	0	0	0.999	0.9	0.859	0.999
RELA	CREBBP	1858923	1845124	9606.ENSP00000384273	9606.ENSP00000262367	0	0	0	0	0	0.999	0.9	0.91	0.999
TP53	YY1	1846083	1845097	9606.ENSP00000269305	9606.ENSP00000262238	0	0	0	0	0	0.96	0.9	0.965	0.999
TAF8	TBP	1855796	1843249	9606.ENSP00000362068	9606.ENSP00000230354	0	0	0	0	0	0.999	0.9	0.459	0.999
NOP58	FBL	1845519	1842861	9606.ENSP00000264279	9606.ENSP00000221801	0	0	0	0	0	0.982	0	0.984	0.999
TAF6	TBP	1860193	1843249	9606.ENSP00000399982	9606.ENSP00000230354	0	0	0	0	0	0.999	0.9	0.922	0.999
TAF10	TAF9	1848061	1842675	9606.ENSP00000299424	9606.ENSP00000217893	0	0	0	0	0	0.999	0.9	0.792	0.999
TAF12	TAF4	1845448	1844180	9606.ENSP00000263974	9606.ENSP00000252996	0	0	0	0	0	0.999	0.9	0.942	0.999
PSMB6	PSMA6	1846162	1844920	9606.ENSP00000270586	9606.ENSP00000261479	0	0	0	0	0	0.998	0.9	0.693	0.999
TAF13	TBP	1854288	1843249	9606.ENSP00000355051	9606.ENSP00000230354	0	0	0	0	0	0.999	0.9	0.695	0.999
GTF2H3	GTF2H1	1862288	1845828	9606.ENSP00000445162	9606.ENSP00000265963	0	0	0	0	0	0.999	0.9	0.863	0.999
PSMB6	PSMA4	1846162	1842214	9606.ENSP00000270586	9606.ENSP00000044462	0	0	0	0	0	0.999	0.9	0.555	0.999
TAF8	TAF1	1855796	1846471	9606.ENSP00000362068	9606.ENSP00000276072	0	0	0	0	0	0.999	0.72	0.643	0.999
RAN	KPNB1	1857999	1847208	9606.ENSP00000376176	9606.ENSP00000290158	0	0	0	0	0	0.999	0.9	0.716	0.999
SIN3A	SAP30	1854005	1847743	9606.ENSP00000353622	9606.ENSP00000296504	0	0	0	0	0	0.999	0.9	0.8	0.999
TAF13	TAF11	1854288	1854176	9606.ENSP00000355051	9606.ENSP00000354633	0	0	0	0	0	0.998	0.9	0.985	0.999
PSMB6	PSMA2	1846162	1842974	9606.ENSP00000270586	9606.ENSP00000223321	0	0	0	0	0	0.999	0.9	0.645	0.999
RAN	TNPO1	1857999	1851910	9606.ENSP00000376176	9606.ENSP00000336712	0	0	0	0	0	0.999	0	0.423	0.999
PSMA6	PSMB7	1844920	1844696	9606.ENSP00000261479	9606.ENSP00000259457	0	0	0	0	0	0.998	0.9	0.585	0.999
HDAC1	MBD3	1855935	1842265	9606.ENSP00000362649	9606.ENSP00000156825	0	0	0	0	0	0.999	0.9	0.329	0.999
BRCA1	POLR2A	1861387	1849743	9606.ENSP00000418960	9606.ENSP00000314949	0	0	0	0	0	0.999	0	0.267	0.999
HDAC2	RBBP7	1861837	1857150	9606.ENSP00000430432	9606.ENSP00000369424	0	0	0	0	0	0.998	0.9	0.921	0.999
TAF5	TAF12	1855115	1845448	9606.ENSP00000358854	9606.ENSP00000263974	0	0	0	0	0	0.999	0.9	0.915	0.999
SP1	TP53	1851138	1846083	9606.ENSP00000329357	9606.ENSP00000269305	0	0	0	0	0	0.999	0.9	0.91	0.999
TAF3	TAF1	1852303	1846471	9606.ENSP00000340271	9606.ENSP00000276072	0	0	0	0	0	0.998	0.72	0.662	0.999
SMC2	NCAPG	1847012	1844063	9606.ENSP00000286398	9606.ENSP00000251496	0	0	0	0	0	0.999	0.9	0.808	0.999
PSMB1	PSMB3	1845087	1843022	9606.ENSP00000262193	9606.ENSP00000225426	0	0	0	0.758	0	0.999	0.9	0.668	0.999
TAF12	TBP	1845448	1843249	9606.ENSP00000263974	9606.ENSP00000230354	0	0	0	0	0	0.999	0.9	0.78	0.999
MCM7	MCM3	1848945	1843226	9606.ENSP00000307288	9606.ENSP00000229854	0	0	0	0.797	0	0.999	0.9	0.936	0.999
NCAPD2	NCAPH	1850703	1843566	9606.ENSP00000325017	9606.ENSP00000240423	0	0	0	0	0	0.989	0.9	0.973	0.999
CDK1	CCNE1	1858283	1845190	9606.ENSP00000378699	9606.ENSP00000262643	0	0	0	0	0	0.982	0.9	0.873	0.999
HDAC1	MBD2	1855935	1844432	9606.ENSP00000362649	9606.ENSP00000256429	0	0	0	0	0	0.997	0.9	0.393	0.999
RELA	SP1	1858923	1851138	9606.ENSP00000384273	9606.ENSP00000329357	0	0	0	0	0	0.992	0.9	0.386	0.999
KPNA2	KPNB1	1851476	1847208	9606.ENSP00000332455	9606.ENSP00000290158	0	0	0	0	0	0.841	0.9	0.983	0.999
TAF2	TAF10	1856824	1848061	9606.ENSP00000367406	9606.ENSP00000299424	0	0	0	0	0	0.999	0.9	0.779	0.999
TRRAP	KAT2A	1853208	1843061	9606.ENSP00000347733	9606.ENSP00000225916	0	0	0	0	0	0.853	0.9	0.984	0.999
TAF8	TAF4	1855796	1844180	9606.ENSP00000362068	9606.ENSP00000252996	0	0	0	0	0	0.999	0.9	0.77	0.999
MCM7	MCM6	1848945	1845487	9606.ENSP00000307288	9606.ENSP00000264156	0	0	0	0.804	0	0.999	0.9	0.915	0.999
RBBP4	MTA1	1855919	1851603	9606.ENSP00000362592	9606.ENSP00000333633	0	0	0	0	0	0.998	0.9	0.802	0.999
PSMB10	PSMB6	1853696	1846162	9606.ENSP00000351314	9606.ENSP00000270586	0	0	0	0.757	0	0.999	0.9	0.821	0.999
TAF7	TAF1	1849570	1846471	9606.ENSP00000312709	9606.ENSP00000276072	0	0	0	0	0	0.999	0.9	0.98	0.999
TAF11	TAF1	1854176	1846471	9606.ENSP00000354633	9606.ENSP00000276072	0	0	0	0	0	0.999	0.9	0.77	0.999
EIF3A	EIF3B	1854958	1854079	9606.ENSP00000358140	9606.ENSP00000354125	0	0	0	0	0	0.999	0.9	0.98	0.999
TAF10	KAT2B	1848061	1845408	9606.ENSP00000299424	9606.ENSP00000263754	0	0	0	0	0	0.984	0.9	0.864	0.999
TAF8	TAF9	1855796	1842675	9606.ENSP00000362068	9606.ENSP00000217893	0	0	0	0	0	0.999	0.9	0.57	0.999
TAF5	TAF10	1855115	1848061	9606.ENSP00000358854	9606.ENSP00000299424	0	0	0	0	0	0.999	0.9	0.888	0.999
BRCA1	H2AFX	1861387	1856252	9606.ENSP00000418960	9606.ENSP00000364310	0	0	0	0	0	0.999	0.9	0.814	0.999
PSMB2	PSMA6	1855861	1844920	9606.ENSP00000362334	9606.ENSP00000261479	0	0	0	0	0	0.999	0.9	0.506	0.999
EP300	NFKB1	1845316	1843094	9606.ENSP00000263253	9606.ENSP00000226574	0	0	0	0	0	0.963	0.9	0.68	0.998
PAF1	SUPT16H	1842822	1842582	9606.ENSP00000221265	9606.ENSP00000216297	0	0	0	0	0	0.998	0	0.135	0.998
GTF2H2	GTF2H1	1846383	1845828	9606.ENSP00000274400	9606.ENSP00000265963	0	0	0	0	0	0.722	0.9	0.949	0.998
TUBA1A	TUBA4A	1848244	1843912	9606.ENSP00000301071	9606.ENSP00000248437	0	0	0	0.989	0	0.985	0.9	0.285	0.998
ERCC2	CDK7	1857962	1844436	9606.ENSP00000375809	9606.ENSP00000256443	0	0	0	0	0	0.913	0.9	0.852	0.998
TUBB2A	TUBB4B	1857206	1852441	9606.ENSP00000369703	9606.ENSP00000341289	0	0	0	0.989	0	0.985	0.9	0.688	0.998
ERCC2	GTF2H2	1857962	1846383	9606.ENSP00000375809	9606.ENSP00000274400	0	0	0	0	0	0.722	0.9	0.948	0.998
XPO1	RANBP2	1858987	1846837	9606.ENSP00000384863	9606.ENSP00000283195	0	0	0	0	0	0.701	0.9	0.963	0.998
HDAC2	SUZ12	1861837	1849881	9606.ENSP00000430432	9606.ENSP00000316578	0	0	0	0	0	0.983	0.9	0.414	0.998
XRCC6	SIRT1	1853821	1842473	9606.ENSP00000352257	9606.ENSP00000212015	0	0	0	0	0	0.812	0.9	0.923	0.998
MYC	TP53	1856789	1846083	9606.ENSP00000367207	9606.ENSP00000269305	0	0	0	0	0	0.15	0.9	0.981	0.998
SSRP1	PAF1	1846565	1842822	9606.ENSP00000278412	9606.ENSP00000221265	0	0	0	0	0	0.998	0	0.135	0.998
CREB1	TP53	1859295	1846083	9606.ENSP00000387699	9606.ENSP00000269305	0	0	0	0	0	0.972	0	0.938	0.998
ILF3	EIF2AK2	1860459	1843335	9606.ENSP00000404121	9606.ENSP00000233057	0	0	0	0	0	0.983	0	0.893	0.998
TAF2	TAF13	1856824	1854288	9606.ENSP00000367406	9606.ENSP00000355051	0	0	0	0	0	0.949	0.9	0.813	0.998
HIST1H4A	KAT5	1853925	1852315	9606.ENSP00000352980	9606.ENSP00000340330	0	0	0	0	0	0.997	0	0.389	0.998
ACTL6A	YEATS4	1860014	1843878	9606.ENSP00000397552	9606.ENSP00000247843	0	0	0	0	0	0.887	0.9	0.895	0.998
MCM7	ORC5	1848945	1847866	9606.ENSP00000307288	9606.ENSP00000297431	0	0	0	0	0	0.958	0.9	0.695	0.998
ACTL6A	SMARCB1	1860014	1845291	9606.ENSP00000397552	9606.ENSP00000263121	0	0	0	0	0	0.954	0.9	0.725	0.998
TUBB4B	TUBA4A	1852441	1843912	9606.ENSP00000341289	9606.ENSP00000248437	0	0	0	0.921	0	0.989	0.9	0.797	0.998
TOP2A	TOP1	1860923	1854138	9606.ENSP00000411532	9606.ENSP00000354522	0	0	0	0	0	0.978	0	0.944	0.998
NUP98	NUP153	1849839	1845057	9606.ENSP00000316032	9606.ENSP00000262077	0	0	0	0	0	0.421	0.9	0.978	0.998
RBBP7	MTA1	1857150	1851603	9606.ENSP00000369424	9606.ENSP00000333633	0	0	0	0	0	0.924	0.9	0.827	0.998
RUVBL2	KAT5	1864926	1852315	9606.ENSP00000473172	9606.ENSP00000340330	0	0	0	0	0	0.931	0.9	0.75	0.998
EP300	SIRT1	1845316	1842473	9606.ENSP00000263253	9606.ENSP00000212015	0	0	0	0	0	0.865	0.9	0.908	0.998
HDAC2	MTA3	1861837	1859013	9606.ENSP00000430432	9606.ENSP00000385045	0	0	0	0	0	0.956	0.9	0.753	0.998
USF1	USF2	1854711	1842906	9606.ENSP00000356999	9606.ENSP00000222305	0	0	0	0.949	0	0.998	0	0.969	0.998
GTF2B	POLR2B	1855275	1849572	9606.ENSP00000359531	9606.ENSP00000312735	0	0	0	0	0	0.95	0.9	0.774	0.998
PSMB6	PSMB1	1846162	1845087	9606.ENSP00000270586	9606.ENSP00000262193	0	0	0	0.652	0	0.982	0.9	0.792	0.998
EP300	IRF1	1845316	1843757	9606.ENSP00000263253	9606.ENSP00000245414	0	0	0	0	0	0.963	0.9	0.58	0.998
HDAC1	RBL2	1855935	1845071	9606.ENSP00000362649	9606.ENSP00000262133	0	0	0	0	0	0.951	0.9	0.752	0.998
PARP1	TP53	1854450	1846083	9606.ENSP00000355759	9606.ENSP00000269305	0	0	0	0	0	0.983	0	0.924	0.998
SAP18	ACIN1	1857541	1845198	9606.ENSP00000371973	9606.ENSP00000262710	0	0	0	0	0	0.972	0.9	0.386	0.998
TAF13	TAF1	1854288	1846471	9606.ENSP00000355051	9606.ENSP00000276072	0	0	0	0	0	0.944	0.9	0.697	0.998
RBBP4	MBD3	1855919	1842265	9606.ENSP00000362592	9606.ENSP00000156825	0	0	0	0	0	0.986	0.9	0.243	0.998
KAT2B	SIRT1	1845408	1842473	9606.ENSP00000263754	9606.ENSP00000212015	0	0	0	0	0	0.668	0.9	0.948	0.998
HDAC1	SMARCA5	1855935	1846833	9606.ENSP00000362649	9606.ENSP00000283131	0	0	0	0	0	0.931	0.9	0.855	0.998
ACTL6A	KAT5	1860014	1852315	9606.ENSP00000397552	9606.ENSP00000340330	0	0	0	0	0	0.956	0.9	0.682	0.998
AFF4	CCNT1	1845731	1845024	9606.ENSP00000265343	9606.ENSP00000261900	0	0	0	0	0	0.985	0	0.899	0.998
ACTL6A	TRRAP	1860014	1853208	9606.ENSP00000397552	9606.ENSP00000347733	0	0	0	0	0	0.876	0.9	0.908	0.998
CHD4	MTA1	1853454	1851603	9606.ENSP00000349508	9606.ENSP00000333633	0	0	0	0	0	0.826	0.9	0.923	0.998
TUBB2A	TUBA1B	1857206	1851928	9606.ENSP00000369703	9606.ENSP00000336799	0	0	0	0.919	0	0.981	0.9	0.872	0.998
NUP98	NUP85	1849839	1843765	9606.ENSP00000316032	9606.ENSP00000245544	0	0	0	0	0	0.907	0.9	0.834	0.998
CDK9	CTDP1	1855868	1848076	9606.ENSP00000362361	9606.ENSP00000299543	0	0	0	0	0	0.909	0.9	0.83	0.998
TUBB4B	TUBA1A	1852441	1848244	9606.ENSP00000341289	9606.ENSP00000301071	0	0	0	0.92	0	0.978	0.9	0.847	0.997
TAF4B	TBP	1846067	1843249	9606.ENSP00000269142	9606.ENSP00000230354	0	0	0	0	0	0.849	0.9	0.855	0.997
XRCC6	TP53	1853821	1846083	9606.ENSP00000352257	9606.ENSP00000269305	0	0	0	0	0	0.576	0.9	0.938	0.997
PSMB5	PSMB10	1854354	1853696	9606.ENSP00000355325	9606.ENSP00000351314	0	0	0	0.709	0	0.968	0.9	0.81	0.997
HDAC1	CREBBP	1855935	1845124	9606.ENSP00000362649	9606.ENSP00000262367	0	0	0	0	0	0.864	0.9	0.814	0.997
HIST1H2BJ	H2AFZ	1852636	1847723	9606.ENSP00000342886	9606.ENSP00000296417	0	0	0	0	0	0.949	0.8	0.738	0.997
RBBP7	SUZ12	1857150	1849881	9606.ENSP00000369424	9606.ENSP00000316578	0	0	0	0	0	0.764	0.9	0.898	0.997
XPO1	RANGAP1	1858987	1853317	9606.ENSP00000384863	9606.ENSP00000348577	0	0	0	0	0	0.923	0.9	0.738	0.997
CDK1	HIST1H1B	1858283	1851214	9606.ENSP00000378699	9606.ENSP00000330074	0	0	0	0	0	0.997	0	0.151	0.997
ORC4	MCM6	1845494	1845487	9606.ENSP00000264169	9606.ENSP00000264156	0	0	0	0	0	0.947	0.9	0.562	0.997
HDAC1	KAT5	1855935	1852315	9606.ENSP00000362649	9606.ENSP00000340330	0	0	0	0	0	0.895	0.9	0.802	0.997
USF1	GTF2I	1854711	1850459	9606.ENSP00000356999	9606.ENSP00000322542	0	0	0	0	0	0.961	0	0.949	0.997
RELA	GTF2B	1858923	1855275	9606.ENSP00000384273	9606.ENSP00000359531	0	0	0	0	0	0.812	0.9	0.875	0.997
TAF1	TP53	1846471	1846083	9606.ENSP00000276072	9606.ENSP00000269305	0	0	0	0	0	0.803	0.9	0.878	0.997
CLOCK	ARNTL2	1849105	1845873	9606.ENSP00000308741	9606.ENSP00000266503	0	0	0	0.666	0	0.969	0.9	0.913	0.997
TAF6L	TAF12	1847468	1845448	9606.ENSP00000294168	9606.ENSP00000263974	0	0	0	0	0	0.827	0.9	0.855	0.997
TAF1	TAF4B	1846471	1846067	9606.ENSP00000276072	9606.ENSP00000269142	0	0	0	0	0	0.909	0.9	0.763	0.997
HDAC1	KAT2B	1855935	1845408	9606.ENSP00000362649	9606.ENSP00000263754	0	0	0	0	0	0.566	0.9	0.945	0.997
YBX1	TP53	1855704	1846083	9606.ENSP00000361626	9606.ENSP00000269305	0	0	0	0	0	0.972	0	0.903	0.997
MYC	JUN	1856789	1855436	9606.ENSP00000367207	9606.ENSP00000360266	0	0	0	0	0	0.83	0.9	0.878	0.997
JUN	TP53	1855436	1846083	9606.ENSP00000360266	9606.ENSP00000269305	0	0	0	0	0	0	0.9	0.972	0.997
GATAD2A	MBD2	1853731	1844432	9606.ENSP00000351552	9606.ENSP00000256429	0	0	0	0	0	0.979	0.9	0.074	0.997
CEBPB	SMARCA2	1848728	1845805	9606.ENSP00000305422	9606.ENSP00000265773	0	0	0	0	0	0.961	0.9	0.283	0.997
SAP130	TAF10	1853576	1848061	9606.ENSP00000350333	9606.ENSP00000299424	0	0	0	0	0	0.971	0.9	0	0.997
CEBPB	NFKB1	1848728	1843094	9606.ENSP00000305422	9606.ENSP00000226574	0	0	0	0	0	0.576	0.9	0.943	0.997
CDK1	TP53	1858283	1846083	9606.ENSP00000378699	9606.ENSP00000269305	0	0	0	0	0	0.914	0	0.97	0.997
TP53	EGR1	1846083	1843543	9606.ENSP00000269305	9606.ENSP00000239938	0	0	0	0	0	0.963	0	0.937	0.997
NPM1	TP53	1847808	1846083	9606.ENSP00000296930	9606.ENSP00000269305	0	0	0	0	0	0.966	0	0.928	0.997
MYC	CREBBP	1856789	1845124	9606.ENSP00000367207	9606.ENSP00000262367	0	0	0	0	0	0.808	0.9	0.892	0.997
MYC	SP1	1856789	1851138	9606.ENSP00000367207	9606.ENSP00000329357	0	0	0	0	0	0.962	0.9	0.501	0.997
MBD2	MBD3	1844432	1842265	9606.ENSP00000256429	9606.ENSP00000156825	0	0	0	0.976	0	0.98	0.9	0.325	0.997
RDBP	TH1L	1856295	1852578	9606.ENSP00000364578	9606.ENSP00000342300	0	0	0	0	0	0.789	0.9	0.878	0.997
CDK1	JUN	1858283	1855436	9606.ENSP00000378699	9606.ENSP00000360266	0	0	0	0	0	0.337	0.9	0.969	0.997
ACTL6A	DMAP1	1860014	1849566	9606.ENSP00000397552	9606.ENSP00000312697	0	0	0	0	0	0.965	0.9	0.437	0.997
PPP1CC	PPP1R8	1851808	1849448	9606.ENSP00000335084	9606.ENSP00000311677	0	0	0	0	0	0.971	0	0.915	0.997
MTA1	TP53	1851603	1846083	9606.ENSP00000333633	9606.ENSP00000269305	0	0	0	0	0	0.98	0	0.877	0.997
BRCA1	MYC	1861387	1856789	9606.ENSP00000418960	9606.ENSP00000367207	0	0	0	0	0	0.992	0	0.658	0.997
EEF1D	EEF1A1	1859610	1851211	9606.ENSP00000391944	9606.ENSP00000330054	0	0	0	0	0	0.661	0.9	0.92	0.997
XRCC5	PARP1	1857983	1854450	9606.ENSP00000375977	9606.ENSP00000355759	0	0	0	0	0	0.994	0	0.573	0.997
RELA	NFKB2	1858923	1855147	9606.ENSP00000384273	9606.ENSP00000358983	0	0	0	0.806	0	0.966	0.9	0.93	0.997
MYC	KAT2B	1856789	1845408	9606.ENSP00000367207	9606.ENSP00000263754	0	0	0	0	0	0.65	0.9	0.932	0.997
TAF13	TAF7	1854288	1849570	9606.ENSP00000355051	9606.ENSP00000312709	0	0	0	0	0	0.824	0.9	0.867	0.997
POLR2A	PAF1	1849743	1842822	9606.ENSP00000314949	9606.ENSP00000221265	0	0	0	0	0	0.996	0	0.459	0.997
NFATC2	CREBBP	1858353	1845124	9606.ENSP00000379330	9606.ENSP00000262367	0	0	0	0	0	0.812	0.9	0.858	0.997
TAF12	KAT2B	1845448	1845408	9606.ENSP00000263974	9606.ENSP00000263754	0	0	0	0	0	0.893	0.9	0.743	0.997
TAF4B	TAF12	1846067	1845448	9606.ENSP00000269142	9606.ENSP00000263974	0	0	0	0	0	0.922	0.9	0.701	0.997
GTF2B	TAF11	1855275	1854176	9606.ENSP00000359531	9606.ENSP00000354633	0	0	0	0	0	0.929	0.9	0.719	0.997
GTF2H3	CCNH	1862288	1844473	9606.ENSP00000445162	9606.ENSP00000256897	0	0	0	0	0	0.95	0.9	0.502	0.997
BRCA1	CREBBP	1861387	1845124	9606.ENSP00000418960	9606.ENSP00000262367	0	0	0	0	0	0.996	0	0.407	0.997
HNRNPK	YBX1	1856467	1855704	9606.ENSP00000365439	9606.ENSP00000361626	0	0	0	0	0	0.803	0.9	0.896	0.997
KAT2B	TAF9	1845408	1842675	9606.ENSP00000263754	9606.ENSP00000217893	0	0	0	0	0	0.849	0.9	0.816	0.997
NFKB1	RELB	1843094	1842834	9606.ENSP00000226574	9606.ENSP00000221452	0	0	0	0.773	0	0.972	0.9	0.965	0.997
TH1L	COBRA1	1852578	1852223	9606.ENSP00000342300	9606.ENSP00000339495	0	0	0	0	0	0.846	0.9	0.782	0.996
CDC5L	SNRNP200	1855491	1849929	9606.ENSP00000360532	9606.ENSP00000317123	0	0	0	0	0	0.992	0	0.603	0.996
MYC	CCNB1	1856789	1844435	9606.ENSP00000367207	9606.ENSP00000256442	0	0	0	0	0	0.574	0.9	0.923	0.996
SAP18	SIN3A	1857541	1854005	9606.ENSP00000371973	9606.ENSP00000353622	0	0	0	0	0	0.806	0.9	0.838	0.996
MYL6	MYH9	1862334	1842558	9606.ENSP00000446714	9606.ENSP00000216181	0	0	0	0	0	0.949	0.9	0.433	0.996
HIST1H2BJ	H2AFV	1852636	1849067	9606.ENSP00000342886	9606.ENSP00000308405	0	0	0	0	0	0.949	0.8	0.726	0.996
SF3B3	PRPF8	1848773	1848629	9606.ENSP00000305790	9606.ENSP00000304350	0	0	0	0	0	0.957	0.9	0.181	0.996
HNRNPH1	HNRNPD	1853404	1849608	9606.ENSP00000349168	9606.ENSP00000313199	0	0	0	0	0	0.941	0.9	0.518	0.996
MEAF6	DMAP1	1855823	1849566	9606.ENSP00000362166	9606.ENSP00000312697	0	0	0	0	0	0.942	0.9	0.512	0.996
TP53	EIF2AK2	1846083	1843335	9606.ENSP00000269305	9606.ENSP00000233057	0	0	0	0	0	0.808	0.9	0.825	0.996
RUVBL2	NOP58	1864926	1845519	9606.ENSP00000473172	9606.ENSP00000264279	0	0	0	0	0	0.946	0	0.932	0.996
RBBP4	SMARCA5	1855919	1846833	9606.ENSP00000362592	9606.ENSP00000283131	0	0	0	0	0	0.875	0.9	0.735	0.996
TAF6	GTF2B	1860193	1855275	9606.ENSP00000399982	9606.ENSP00000359531	0	0	0	0	0	0	0.9	0.962	0.996
WHSC2	RDBP	1857584	1856295	9606.ENSP00000372335	9606.ENSP00000364578	0	0	0	0	0	0.687	0.9	0.902	0.996
HDAC2	CREBBP	1861837	1845124	9606.ENSP00000430432	9606.ENSP00000262367	0	0	0	0	0	0.861	0.9	0.763	0.996
HDAC2	KAT2B	1861837	1845408	9606.ENSP00000430432	9606.ENSP00000263754	0	0	0	0	0	0.566	0.9	0.92	0.996
TUBA1B	TUBA1A	1851928	1848244	9606.ENSP00000336799	9606.ENSP00000301071	0	0	0	0.991	0	0.971	0.9	0.324	0.996
WHSC2	COBRA1	1857584	1852223	9606.ENSP00000372335	9606.ENSP00000339495	0	0	0	0	0	0.687	0.9	0.885	0.996
TAF10	KAT2A	1848061	1843061	9606.ENSP00000299424	9606.ENSP00000225916	0	0	0	0	0	0.768	0.9	0.864	0.996
TUBB3	TUBA1A	1862767	1848244	9606.ENSP00000451560	9606.ENSP00000301071	0	0	0	0.908	0	0.98	0.8	0.806	0.996
KAT5	APP	1852315	1846936	9606.ENSP00000340330	9606.ENSP00000284981	0	0	0	0	0	0.983	0	0.775	0.996
KAT2B	YY1	1845408	1845097	9606.ENSP00000263754	9606.ENSP00000262238	0	0	0	0	0	0.595	0.9	0.92	0.996
SMARCA4	CREBBP	1853627	1845124	9606.ENSP00000350720	9606.ENSP00000262367	0	0	0	0	0	0.925	0.9	0.598	0.996
GTF2B	TAF1	1855275	1846471	9606.ENSP00000359531	9606.ENSP00000276072	0	0	0	0	0	0.781	0.9	0.841	0.996
RELA	CEBPB	1858923	1848728	9606.ENSP00000384273	9606.ENSP00000305422	0	0	0	0	0	0.917	0.9	0.586	0.996
TUBB3	TUBA4A	1862767	1843912	9606.ENSP00000451560	9606.ENSP00000248437	0	0	0	0.911	0	0.98	0.8	0.756	0.996
SMARCA4	TP53	1853627	1846083	9606.ENSP00000350720	9606.ENSP00000269305	0	0	0	0	0	0.962	0	0.899	0.996
HDAC1	TGIF1	1855935	1850975	9606.ENSP00000362649	9606.ENSP00000327959	0	0	0	0	0	0.96	0.9	0.162	0.996
TAF11	POLR2A	1854176	1849743	9606.ENSP00000354633	9606.ENSP00000314949	0	0	0	0	0	0.968	0.9	0.09	0.996
BRCA1	CDK2	1861387	1845906	9606.ENSP00000418960	9606.ENSP00000266970	0	0	0	0	0	0.914	0.9	0.58	0.996
PBX1	MEIS1	1860561	1846251	9606.ENSP00000405890	9606.ENSP00000272369	0	0	0	0.635	0	0.992	0	0.986	0.995
PHB	TP53	1848178	1846083	9606.ENSP00000300408	9606.ENSP00000269305	0	0	0	0	0	0.962	0	0.888	0.995
TUBB3	TUBA1B	1862767	1851928	9606.ENSP00000451560	9606.ENSP00000336799	0	0	0	0.91	0	0.975	0.8	0.803	0.995
MTA3	RBBP7	1859013	1857150	9606.ENSP00000385045	9606.ENSP00000369424	0	0	0	0	0	0.757	0.9	0.839	0.995
PBRM1	SMARCC2	1858233	1845915	9606.ENSP00000378307	9606.ENSP00000267064	0	0	0	0	0	0.985	0	0.711	0.995
YBX1	HNRNPD	1855704	1849608	9606.ENSP00000361626	9606.ENSP00000313199	0	0	0	0	0	0.564	0.9	0.902	0.995
TP53	MLH1	1846083	1843304	9606.ENSP00000269305	9606.ENSP00000231790	0	0	0	0	0	0	0.9	0.961	0.995
PCBP2	HNRNPL	1853847	1842831	9606.ENSP00000352438	9606.ENSP00000221419	0	0	0	0	0	0.912	0.9	0.564	0.995
PSMB2	PSMB10	1855861	1853696	9606.ENSP00000362334	9606.ENSP00000351314	0	0	0	0	0	0.833	0.9	0.728	0.995
TUBA1C	TUBA4A	1848245	1843912	9606.ENSP00000301072	9606.ENSP00000248437	0	0	0	0.989	0	0.952	0.9	0.138	0.995
MTA1	MNAT1	1851603	1844871	9606.ENSP00000333633	9606.ENSP00000261245	0	0	0	0	0	0.57	0.9	0.894	0.995
HNRNPK	HNRNPF	1856467	1852109	9606.ENSP00000365439	9606.ENSP00000338477	0	0	0	0	0	0.558	0.9	0.909	0.995
TP53	CCNB1	1846083	1844435	9606.ENSP00000269305	9606.ENSP00000256442	0	0	0	0	0	0	0.9	0.96	0.995
TUBB3	TUBA1C	1862767	1848245	9606.ENSP00000451560	9606.ENSP00000301072	0	0	0	0.912	0	0.977	0.8	0.805	0.995
H2AFX	XRCC6	1856252	1853821	9606.ENSP00000364310	9606.ENSP00000352257	0	0	0	0	0	0.974	0	0.821	0.995
GTF2H1	CDK7	1845828	1844436	9606.ENSP00000265963	9606.ENSP00000256443	0	0	0	0	0	0.848	0.9	0.702	0.995
SP3	TP53	1849281	1846083	9606.ENSP00000310301	9606.ENSP00000269305	0	0	0	0	0	0.992	0	0.358	0.995
HNRNPH1	HNRNPL	1853404	1842831	9606.ENSP00000349168	9606.ENSP00000221419	0	0	0	0	0	0.909	0.9	0.547	0.995
HDAC1	SP3	1855935	1849281	9606.ENSP00000362649	9606.ENSP00000310301	0	0	0	0	0	0.992	0	0.4	0.995
CDC5L	SF3B1	1855491	1851836	9606.ENSP00000360532	9606.ENSP00000335321	0	0	0	0	0	0.986	0	0.682	0.995
KAT2B	TBP	1845408	1843249	9606.ENSP00000263754	9606.ENSP00000230354	0	0	0	0	0	0.667	0.9	0.87	0.995
NUP88	RANBP2	1863294	1846837	9606.ENSP00000458954	9606.ENSP00000283195	0	0	0	0	0	0	0.9	0.96	0.995
KAT5	SIRT1	1852315	1842473	9606.ENSP00000340330	9606.ENSP00000212015	0	0	0	0	0	0.951	0	0.913	0.995
TRRAP	TAF10	1853208	1848061	9606.ENSP00000347733	9606.ENSP00000299424	0	0	0	0	0	0.827	0.9	0.748	0.995
LARP7	MEPCE	1849695	1849081	9606.ENSP00000314311	9606.ENSP00000308546	0	0	0	0	0	0.845	0	0.97	0.995
TAF5	TRRAP	1855115	1853208	9606.ENSP00000358854	9606.ENSP00000347733	0	0	0	0	0	0.83	0.9	0.733	0.995
ACTL6A	EP400	1860014	1857832	9606.ENSP00000397552	9606.ENSP00000374212	0	0	0	0	0	0.902	0.9	0.615	0.995
KAT2B	IRF1	1845408	1843757	9606.ENSP00000263754	9606.ENSP00000245414	0	0	0	0	0	0.914	0.9	0.398	0.994
SMARCA4	SP1	1853627	1851138	9606.ENSP00000350720	9606.ENSP00000329357	0	0	0	0	0	0.968	0	0.842	0.994
PARP1	XRCC6	1854450	1853821	9606.ENSP00000355759	9606.ENSP00000352257	0	0	0	0	0	0.986	0	0.626	0.994
MTA3	CHD4	1859013	1853454	9606.ENSP00000385045	9606.ENSP00000349508	0	0	0	0	0	0.701	0.9	0.817	0.994
POLR2A	CCNT1	1849743	1845024	9606.ENSP00000314949	9606.ENSP00000261900	0	0	0	0	0	0.657	0.9	0.849	0.994
TRRAP	TAF12	1853208	1845448	9606.ENSP00000347733	9606.ENSP00000263974	0	0	0	0	0	0.831	0.9	0.713	0.994
TAF13	TAF3	1854288	1852303	9606.ENSP00000355051	9606.ENSP00000340271	0	0	0	0	0	0.777	0.9	0.764	0.994
ERCC3	CDK7	1846961	1844436	9606.ENSP00000285398	9606.ENSP00000256443	0	0	0	0	0	0.679	0.9	0.851	0.994
GTF2B	ERCC3	1855275	1846961	9606.ENSP00000359531	9606.ENSP00000285398	0	0	0	0	0	0.722	0.9	0.807	0.994
NUP98	KPNB1	1849839	1847208	9606.ENSP00000316032	9606.ENSP00000290158	0	0	0	0	0	0.988	0	0.554	0.994
HNRNPD	HNRNPL	1849608	1842831	9606.ENSP00000313199	9606.ENSP00000221419	0	0	0	0	0	0.902	0.9	0.503	0.994
H2AFZ	YEATS4	1847723	1843878	9606.ENSP00000296417	9606.ENSP00000247843	0	0	0	0	0	0.913	0	0.942	0.994
REL	NFKB1	1847519	1843094	9606.ENSP00000295025	9606.ENSP00000226574	0	0	0	0.78	0	0.927	0.9	0.988	0.994
TAF6	TRRAP	1860193	1853208	9606.ENSP00000399982	9606.ENSP00000347733	0	0	0	0	0	0.83	0.9	0.719	0.994
TAF6L	KAT2B	1847468	1845408	9606.ENSP00000294168	9606.ENSP00000263754	0	0	0	0	0	0.912	0.9	0.453	0.994
ITGB1	ITGAV	1848520	1844842	9606.ENSP00000303351	9606.ENSP00000261023	0	0	0	0	0	0.808	0.9	0.713	0.994
CDK9	CCNH	1855868	1844473	9606.ENSP00000362361	9606.ENSP00000256897	0	0	0	0	0	0.71	0.9	0.816	0.994
RELA	JUN	1858923	1855436	9606.ENSP00000384273	9606.ENSP00000360266	0	0	0	0	0	0.812	0.9	0.745	0.994
MTA3	RBBP4	1859013	1855919	9606.ENSP00000385045	9606.ENSP00000362592	0	0	0	0	0	0.757	0.9	0.802	0.994
HDAC2	SP3	1861837	1849281	9606.ENSP00000430432	9606.ENSP00000310301	0	0	0	0	0	0.924	0.9	0.353	0.994
SP1	YY1	1851138	1845097	9606.ENSP00000329357	9606.ENSP00000262238	0	0	0	0.652	0	0.992	0	0.535	0.994
ITGB5	ITGAV	1847692	1844842	9606.ENSP00000296181	9606.ENSP00000261023	0	0	0	0	0	0.81	0.9	0.75	0.994
MYC	CCNT1	1856789	1845024	9606.ENSP00000367207	9606.ENSP00000261900	0	0	0	0	0	0.961	0	0.87	0.994
XPO1	BIRC5	1858987	1848314	9606.ENSP00000384863	9606.ENSP00000301633	0	0	0	0	0	0.57	0.9	0.877	0.994
RBBP4	RBL2	1855919	1845071	9606.ENSP00000362592	9606.ENSP00000262133	0	0	0	0	0	0.827	0.9	0.725	0.994
HNRNPF	HNRNPD	1852109	1849608	9606.ENSP00000338477	9606.ENSP00000313199	0	0	0	0	0	0.896	0.9	0.486	0.994
NFATC2	EGR1	1858353	1843543	9606.ENSP00000379330	9606.ENSP00000239938	0	0	0	0	0	0.564	0.9	0.879	0.994
TP73	EP300	1856848	1845316	9606.ENSP00000367545	9606.ENSP00000263253	0	0	0	0	0	0.992	0	0.282	0.994
MTA2	MBD2	1846587	1844432	9606.ENSP00000278823	9606.ENSP00000256429	0	0	0	0	0	0.899	0.9	0.493	0.994
ETS1	SP1	1858032	1851138	9606.ENSP00000376436	9606.ENSP00000329357	0	0	0	0	0	0.576	0.9	0.874	0.994
HMGB1	TP53	1852653	1846083	9606.ENSP00000343040	9606.ENSP00000269305	0	0	0	0	0	0.953	0	0.897	0.994
RELA	SETD7	1858923	1846356	9606.ENSP00000384273	9606.ENSP00000274031	0	0	0	0	0	0.962	0	0.855	0.994
AFF1	CDK9	1858274	1855868	9606.ENSP00000378578	9606.ENSP00000362361	0	0	0	0	0	0.992	0	0.267	0.993
KAT2A	TAF9	1843061	1842675	9606.ENSP00000225916	9606.ENSP00000217893	0	0	0	0	0	0.578	0.9	0.863	0.993
GTF2B	CTDP1	1855275	1848076	9606.ENSP00000359531	9606.ENSP00000299543	0	0	0	0	0	0.955	0	0.861	0.993
NUP93	NUP153	1849329	1845057	9606.ENSP00000310668	9606.ENSP00000262077	0	0	0	0	0	0.608	0.9	0.852	0.993
H2AFZ	HIST1H4H	1847723	1847164	9606.ENSP00000296417	9606.ENSP00000289352	0	0	0	0	0	0.982	0	0.62	0.993
TAF2	TAF6L	1856824	1847468	9606.ENSP00000367406	9606.ENSP00000294168	0	0	0	0	0	0.824	0.9	0.675	0.993
ILF3	ILF2	1860459	1854278	9606.ENSP00000404121	9606.ENSP00000355011	0	0	0	0.67	0	0.99	0	0.98	0.993
TUBA1B	TUBB6	1851928	1850072	9606.ENSP00000336799	9606.ENSP00000318697	0	0	0	0.92	0	0.933	0.9	0.803	0.993
KPNA2	NUP153	1851476	1845057	9606.ENSP00000332455	9606.ENSP00000262077	0	0	0	0	0	0.782	0.9	0.733	0.993
ACTL6A	MYC	1860014	1856789	9606.ENSP00000397552	9606.ENSP00000367207	0	0	0	0	0	0.619	0.9	0.837	0.993
TAF6	KAT2B	1860193	1845408	9606.ENSP00000399982	9606.ENSP00000263754	0	0	0	0	0	0.757	0.9	0.771	0.993
MYC	BIRC5	1856789	1848314	9606.ENSP00000367207	9606.ENSP00000301633	0	0	0	0	0	0	0.9	0.941	0.993
TUBB6	TUBA1C	1850072	1848245	9606.ENSP00000318697	9606.ENSP00000301072	0	0	0	0.919	0	0.931	0.9	0.799	0.993
TUBB4B	TUBA1B	1852441	1851928	9606.ENSP00000341289	9606.ENSP00000336799	0	0	0	0.919	0	0.936	0.9	0.825	0.993
MYC	NFKB1	1856789	1843094	9606.ENSP00000367207	9606.ENSP00000226574	0	0	0	0	0	0	0.9	0.934	0.993
HDAC1	SAP130	1855935	1853576	9606.ENSP00000362649	9606.ENSP00000350333	0	0	0	0	0	0.928	0.9	0.13	0.993
MCM7	ORC4	1848945	1845494	9606.ENSP00000307288	9606.ENSP00000264169	0	0	0	0	0	0.819	0.9	0.656	0.993
MXD3	MAX	1860311	1853721	9606.ENSP00000401867	9606.ENSP00000351490	0	0	0	0	0	0.992	0	0.234	0.993
TAF6	KAT2A	1860193	1843061	9606.ENSP00000399982	9606.ENSP00000225916	0	0	0	0	0	0.757	0.9	0.737	0.993
SIN3A	SMARCA4	1854005	1853627	9606.ENSP00000353622	9606.ENSP00000350720	0	0	0	0	0	0.98	0	0.655	0.993
TAF5	KAT2B	1855115	1845408	9606.ENSP00000358854	9606.ENSP00000263754	0	0	0	0	0	0.768	0.9	0.724	0.993
HNRNPK	HNRNPL	1856467	1842831	9606.ENSP00000365439	9606.ENSP00000221419	0	0	0	0	0	0.819	0.9	0.633	0.992
HNRNPD	PABPC1	1849608	1849591	9606.ENSP00000313199	9606.ENSP00000313007	0	0	0	0.639	0	0.988	0	0.978	0.992
PLK1	CCNB2	1848135	1847117	9606.ENSP00000300093	9606.ENSP00000288207	0	0	0	0	0	0.361	0.9	0.893	0.992
TAF6L	TAF4	1847468	1844180	9606.ENSP00000294168	9606.ENSP00000252996	0	0	0	0	0	0.722	0.9	0.757	0.992
CDK9	MEPCE	1855868	1849081	9606.ENSP00000362361	9606.ENSP00000308546	0	0	0	0	0	0.966	0	0.782	0.992
BRCA1	EP300	1861387	1845316	9606.ENSP00000418960	9606.ENSP00000263253	0	0	0	0	0	0.983	0	0.568	0.992
PCBP2	HNRNPD	1853847	1849608	9606.ENSP00000352438	9606.ENSP00000313199	0	0	0	0	0	0.843	0.9	0.574	0.992
SF3B1	SNRNP200	1851836	1849929	9606.ENSP00000335321	9606.ENSP00000317123	0	0	0	0	0	0.837	0.9	0.55	0.992
TAF6	TAF4B	1860193	1846067	9606.ENSP00000399982	9606.ENSP00000269142	0	0	0	0	0	0.722	0.9	0.765	0.992
XPO1	NUP153	1858987	1845057	9606.ENSP00000384863	9606.ENSP00000262077	0	0	0	0	0	0.66	0.9	0.802	0.992
MTA1	CCNH	1851603	1844473	9606.ENSP00000333633	9606.ENSP00000256897	0	0	0	0	0	0.57	0.9	0.847	0.992
BIRC5	PLK1	1848314	1848135	9606.ENSP00000301633	9606.ENSP00000300093	0	0	0	0	0	0	0.9	0.931	0.992
HNRNPH1	HNRNPF	1853404	1852109	9606.ENSP00000349168	9606.ENSP00000338477	0	0	0	0.983	0	0.931	0.9	0.964	0.992
HNRNPD	PCBP1	1849608	1848744	9606.ENSP00000313199	9606.ENSP00000305556	0	0	0	0	0	0.843	0.9	0.55	0.992
WDR5	HIST1H3A	1853715	1853568	9606.ENSP00000351446	9606.ENSP00000350275	0	0	0	0	0	0.989	0	0.24	0.992
LMNA	LMNB1	1854773	1844893	9606.ENSP00000357283	9606.ENSP00000261366	0	0	0	0.953	0	0.926	0.9	0.645	0.992
SF3B1	PRPF8	1851836	1848629	9606.ENSP00000335321	9606.ENSP00000304350	0	0	0	0	0	0.905	0.9	0.241	0.992
TAF5	TAF6L	1855115	1847468	9606.ENSP00000358854	9606.ENSP00000294168	0	0	0	0	0	0.722	0.9	0.757	0.992
GTF2H3	CDK7	1862288	1844436	9606.ENSP00000445162	9606.ENSP00000256443	0	0	0	0	0	0.83	0.9	0.613	0.992
ERCC3	TP53	1846961	1846083	9606.ENSP00000285398	9606.ENSP00000269305	0	0	0	0	0	0.914	0	0.913	0.992
EP300	CREBBP	1845316	1845124	9606.ENSP00000263253	9606.ENSP00000262367	0	0	0	0.954	0	0.922	0.9	0.909	0.992
EP400	DMAP1	1857832	1849566	9606.ENSP00000374212	9606.ENSP00000312697	0	0	0	0	0	0.819	0.9	0.621	0.992
TAF12	KAT2A	1845448	1843061	9606.ENSP00000263974	9606.ENSP00000225916	0	0	0	0	0	0.759	0.9	0.715	0.992
POLR2A	SMARCB1	1849743	1845291	9606.ENSP00000314949	9606.ENSP00000263121	0	0	0	0	0	0.889	0.9	0.28	0.991
KAT5	DMAP1	1852315	1849566	9606.ENSP00000340330	9606.ENSP00000312697	0	0	0	0	0	0.812	0.9	0.567	0.991
KAT5	YEATS4	1852315	1843878	9606.ENSP00000340330	9606.ENSP00000247843	0	0	0	0	0	0.702	0.9	0.733	0.991
MYC	SNW1	1856789	1844933	9606.ENSP00000367207	9606.ENSP00000261531	0	0	0	0	0	0.572	0.9	0.817	0.991
HIST1H4H	HIST1H3B	1847164	1843731	9606.ENSP00000289352	9606.ENSP00000244661	0	0	0	0	0	0.971	0	0.722	0.991
TAF10	TAF4B	1848061	1846067	9606.ENSP00000299424	9606.ENSP00000269142	0	0	0	0	0	0.827	0.9	0.562	0.991
HDAC2	SAP130	1861837	1853576	9606.ENSP00000430432	9606.ENSP00000350333	0	0	0	0	0	0.907	0.9	0.147	0.991
GTF2H3	GTF2H2	1862288	1846383	9606.ENSP00000445162	9606.ENSP00000274400	0	0	0	0	0	0.722	0.9	0.707	0.991
MAX	EP300	1853721	1845316	9606.ENSP00000351490	9606.ENSP00000263253	0	0	0	0	0	0.915	0.9	0.115	0.991
RELA	MYC	1858923	1856789	9606.ENSP00000384273	9606.ENSP00000367207	0	0	0	0	0	0.809	0.9	0.601	0.991
CDC5L	PRPF8	1855491	1848629	9606.ENSP00000360532	9606.ENSP00000304350	0	0	0	0	0	0.985	0	0.465	0.991
GTF2B	TAF9	1855275	1842675	9606.ENSP00000359531	9606.ENSP00000217893	0	0	0	0	0	0.806	0	0.956	0.991
KPNA5	KPNB1	1853332	1847208	9606.ENSP00000348704	9606.ENSP00000290158	0	0	0	0	0	0.867	0	0.937	0.991
TAF5	KAT2A	1855115	1843061	9606.ENSP00000358854	9606.ENSP00000225916	0	0	0	0	0	0.768	0.9	0.671	0.991
TAF13	TAF4B	1854288	1846067	9606.ENSP00000355051	9606.ENSP00000269142	0	0	0	0	0	0.827	0.9	0.551	0.991
SIN3A	MTA2	1854005	1846587	9606.ENSP00000353622	9606.ENSP00000278823	0	0	0	0	0	0.781	0.9	0.644	0.991
LMNA	TMPO	1854773	1845899	9606.ENSP00000357283	9606.ENSP00000266732	0	0	0	0	0	0.916	0	0.905	0.991
NFKB2	NFKB1	1855147	1843094	9606.ENSP00000358983	9606.ENSP00000226574	0	0	0	0.801	0	0.905	0.9	0.96	0.991
ITGB5	ITGA5	1847692	1847411	9606.ENSP00000296181	9606.ENSP00000293379	0	0	0	0	0	0.808	0.8	0.762	0.99
THBS1	LRP1	1844779	1843653	9606.ENSP00000260356	9606.ENSP00000243077	0	0	0	0	0	0.917	0	0.893	0.99
JUN	GTF2B	1855436	1855275	9606.ENSP00000360266	9606.ENSP00000359531	0	0	0	0	0	0.606	0.9	0.766	0.99
RELA	KAT2B	1858923	1845408	9606.ENSP00000384273	9606.ENSP00000263754	0	0	0	0	0	0.818	0.9	0.506	0.99
MTA1	MBD3	1851603	1842265	9606.ENSP00000333633	9606.ENSP00000156825	0	0	0	0	0	0.826	0.9	0.515	0.99
MTA3	MBD3	1859013	1842265	9606.ENSP00000385045	9606.ENSP00000156825	0	0	0	0	0	0.814	0.9	0.515	0.99
GTF2B	TAF10	1855275	1848061	9606.ENSP00000359531	9606.ENSP00000299424	0	0	0	0	0	0.673	0.9	0.741	0.99
MYC	NCL	1856789	1850027	9606.ENSP00000367207	9606.ENSP00000318195	0	0	0	0	0	0.143	0.9	0.903	0.99
TAF11	TAF4B	1854176	1846067	9606.ENSP00000354633	9606.ENSP00000269142	0	0	0	0	0	0.827	0.9	0.515	0.99
HIST1H4A	HIST1H3A	1853925	1853568	9606.ENSP00000352980	9606.ENSP00000350275	0	0	0	0	0	0.964	0	0.735	0.99
TRRAP	YEATS4	1853208	1843878	9606.ENSP00000347733	9606.ENSP00000247843	0	0	0	0	0	0.832	0.9	0.484	0.99
HDAC2	EP300	1861837	1845316	9606.ENSP00000430432	9606.ENSP00000263253	0	0	0	0	0	0.487	0.9	0.837	0.99
POLR2A	HNRNPU	1849743	1846836	9606.ENSP00000314949	9606.ENSP00000283179	0	0	0	0	0	0.913	0.9	0	0.99
TBL3	UTP6	1862919	1844970	9606.ENSP00000454836	9606.ENSP00000261708	0	0	0	0	0	0.95	0	0.818	0.99
PSMB10	PSMA6	1853696	1844920	9606.ENSP00000351314	9606.ENSP00000261479	0	0	0	0	0	0.832	0.9	0.503	0.99
CEBPB	EP300	1848728	1845316	9606.ENSP00000305422	9606.ENSP00000263253	0	0	0	0	0	0.812	0.9	0.532	0.99
ITGA5	ITGB3	1847411	1845040	9606.ENSP00000293379	9606.ENSP00000262017	0	0	0	0	0	0.805	0.72	0.841	0.99
NOP2	NOP58	1858730	1845519	9606.ENSP00000382392	9606.ENSP00000264279	0	0	0	0	0	0.975	0	0.615	0.99
POLR2A	GTF2H1	1849743	1845828	9606.ENSP00000314949	9606.ENSP00000265963	0	0	0	0	0	0.809	0.9	0.525	0.99
HDAC1	RUNX1	1855935	1848173	9606.ENSP00000362649	9606.ENSP00000300305	0	0	0	0	0	0.922	0.8	0.451	0.99
SMARCA4	ARID2	1853627	1851800	9606.ENSP00000350720	9606.ENSP00000335044	0	0	0	0	0	0.841	0	0.939	0.99
TAF5	TAF4B	1855115	1846067	9606.ENSP00000358854	9606.ENSP00000269142	0	0	0	0	0	0.722	0.9	0.662	0.989
CREB1	MITF	1859295	1847592	9606.ENSP00000387699	9606.ENSP00000295600	0	0	0	0	0	0	0.9	0.898	0.989
HDAC2	NFKB1	1861837	1843094	9606.ENSP00000430432	9606.ENSP00000226574	0	0	0	0	0	0.794	0.9	0.545	0.989
XRCC5	DHX9	1857983	1854615	9606.ENSP00000375977	9606.ENSP00000356520	0	0	0	0	0	0.912	0	0.884	0.989
PLK1	TP53	1848135	1846083	9606.ENSP00000300093	9606.ENSP00000269305	0	0	0	0	0	0.873	0	0.923	0.989
TAF7	TAF6L	1849570	1847468	9606.ENSP00000312709	9606.ENSP00000294168	0	0	0	0	0	0.722	0.9	0.653	0.989
RELA	TBP	1858923	1843249	9606.ENSP00000384273	9606.ENSP00000230354	0	0	0	0	0	0.914	0	0.879	0.989
JUN	KAT2B	1855436	1845408	9606.ENSP00000360266	9606.ENSP00000263754	0	0	0	0	0	0.32	0.9	0.853	0.989
CCNT1	CDK7	1845024	1844436	9606.ENSP00000261900	9606.ENSP00000256443	0	0	0	0	0	0.362	0.9	0.849	0.989
POLR2A	SMARCA2	1849743	1845805	9606.ENSP00000314949	9606.ENSP00000265773	0	0	0	0	0	0.978	0	0.551	0.989
MYC	NPM1	1856789	1847808	9606.ENSP00000367207	9606.ENSP00000296930	0	0	0	0	0	0	0.9	0.903	0.989
POLR2A	KAT2B	1849743	1845408	9606.ENSP00000314949	9606.ENSP00000263754	0	0	0	0	0	0.52	0.9	0.801	0.989
RUVBL2	MYC	1864926	1856789	9606.ENSP00000473172	9606.ENSP00000367207	0	0	0	0	0	0.865	0.9	0.283	0.989
HIST1H4H	H3F3B	1847164	1844327	9606.ENSP00000289352	9606.ENSP00000254810	0	0	0	0	0	0.971	0	0.663	0.989
TUBA1B	TUBA1C	1851928	1848245	9606.ENSP00000336799	9606.ENSP00000301072	0	0	0	0.99	0	0.903	0.9	0.287	0.989
CDK1	PPP1CA	1858283	1850792	9606.ENSP00000378699	9606.ENSP00000326031	0	0	0	0	0	0.366	0.9	0.851	0.989
PRKRA	TARBP2	1850023	1845909	9606.ENSP00000318176	9606.ENSP00000266987	0	0	0	0.926	0	0.895	0.9	0.896	0.989
CDK1	MCM3	1858283	1843226	9606.ENSP00000378699	9606.ENSP00000229854	0	0	0	0	0	0.698	0	0.965	0.989
SP1	CREBBP	1851138	1845124	9606.ENSP00000329357	9606.ENSP00000262367	0	0	0	0	0	0.824	0.9	0.472	0.989
BCL10	NFKB1	1846181	1843094	9606.ENSP00000271015	9606.ENSP00000226574	0	0	0	0	0	0	0.9	0.896	0.989
HIST2H2AC	HIST1H2BA	1851443	1846410	9606.ENSP00000332194	9606.ENSP00000274764	0	0	0	0	0	0.842	0.8	0.681	0.989
SP1	CEBPB	1851138	1848728	9606.ENSP00000329357	9606.ENSP00000305422	0	0	0	0	0	0.915	0	0.873	0.988
CDK1	CCNH	1858283	1844473	9606.ENSP00000378699	9606.ENSP00000256897	0	0	0	0	0	0.434	0.9	0.811	0.988
POLR2A	ERCC3	1849743	1846961	9606.ENSP00000314949	9606.ENSP00000285398	0	0	0	0	0	0.682	0.9	0.679	0.988
H2AFZ	HIST1H3B	1847723	1843731	9606.ENSP00000296417	9606.ENSP00000244661	0	0	0	0	0	0.975	0	0.55	0.988
TRRAP	TAF9	1853208	1842675	9606.ENSP00000347733	9606.ENSP00000217893	0	0	0	0	0	0.643	0.9	0.692	0.988
HDAC1	NFKBIA	1855935	1842621	9606.ENSP00000362649	9606.ENSP00000216797	0	0	0	0	0	0.828	0.9	0.365	0.988
RUVBL2	YY1	1864926	1845097	9606.ENSP00000473172	9606.ENSP00000262238	0	0	0	0	0	0.866	0.9	0.206	0.988
SIN3A	SMARCA5	1854005	1846833	9606.ENSP00000353622	9606.ENSP00000283131	0	0	0	0	0	0.694	0.9	0.664	0.988
JUN	SIRT1	1855436	1842473	9606.ENSP00000360266	9606.ENSP00000212015	0	0	0	0	0	0.89	0	0.896	0.988
TP73	KAT2B	1856848	1845408	9606.ENSP00000367545	9606.ENSP00000263754	0	0	0	0	0	0.593	0.9	0.744	0.988
HMGB1	KAT2B	1852653	1845408	9606.ENSP00000343040	9606.ENSP00000263754	0	0	0	0	0	0.176	0.9	0.87	0.988
RNGTT	POLR2A	1855036	1849743	9606.ENSP00000358497	9606.ENSP00000314949	0	0	0	0	0	0.832	0.9	0.35	0.988
TP53	GTF2H1	1846083	1845828	9606.ENSP00000269305	9606.ENSP00000265963	0	0	0	0	0	0.983	0	0.33	0.988
RANGAP1	NUP153	1853317	1845057	9606.ENSP00000348577	9606.ENSP00000262077	0	0	0	0	0	0.662	0.9	0.673	0.988
YBX1	HNRNPU	1855704	1846836	9606.ENSP00000361626	9606.ENSP00000283179	0	0	0	0	0	0.827	0.9	0.407	0.988
MTA3	MNAT1	1859013	1844871	9606.ENSP00000385045	9606.ENSP00000261245	0	0	0	0	0	0	0.9	0.894	0.988
HNRNPK	HNRNPD	1856467	1849608	9606.ENSP00000365439	9606.ENSP00000313199	0	0	0	0	0	0.702	0.9	0.62	0.987
ITGB3	THBS1	1845040	1844779	9606.ENSP00000262017	9606.ENSP00000260356	0	0	0	0	0	0.812	0.9	0.386	0.987
H2AFY	HDAC1	1861595	1855935	9606.ENSP00000423563	9606.ENSP00000362649	0	0	0	0	0	0.878	0.8	0.525	0.987
NOP2	NOP56	1858730	1857348	9606.ENSP00000382392	9606.ENSP00000370589	0	0	0	0	0	0.971	0	0.562	0.987
SNRNP200	SF3B3	1849929	1848773	9606.ENSP00000317123	9606.ENSP00000305790	0	0	0	0	0	0.824	0.9	0.346	0.987
PPP1CC	PLK1	1851808	1848135	9606.ENSP00000335084	9606.ENSP00000300093	0	0	0	0	0	0.237	0.9	0.844	0.987
UBTF	TBP	1848435	1843249	9606.ENSP00000302640	9606.ENSP00000230354	0	0	0	0	0	0.649	0.9	0.675	0.987
NUP98	RANBP2	1849839	1846837	9606.ENSP00000316032	9606.ENSP00000283195	0	0	0	0	0	0.087	0.9	0.874	0.987
HDAC1	TBP	1855935	1843249	9606.ENSP00000362649	9606.ENSP00000230354	0	0	0	0	0	0.576	0.9	0.726	0.987
KAT2B	SMARCB1	1845408	1845291	9606.ENSP00000263754	9606.ENSP00000263121	0	0	0	0	0	0.711	0.9	0.612	0.987
RBBP4	MBD2	1855919	1844432	9606.ENSP00000362592	9606.ENSP00000256429	0	0	0	0	0	0.806	0.9	0.402	0.987
YBX1	DHX9	1855704	1854615	9606.ENSP00000361626	9606.ENSP00000356520	0	0	0	0	0	0.708	0.9	0.618	0.987
TRRAP	DMAP1	1853208	1849566	9606.ENSP00000347733	9606.ENSP00000312697	0	0	0	0	0	0.671	0.9	0.65	0.987
MEAF6	KAT5	1855823	1852315	9606.ENSP00000362166	9606.ENSP00000340330	0	0	0	0	0	0.769	0.9	0.507	0.987
SMARCB1	CREBBP	1845291	1845124	9606.ENSP00000263121	9606.ENSP00000262367	0	0	0	0	0	0.83	0.9	0.317	0.987
NUP88	XPO1	1863294	1858987	9606.ENSP00000458954	9606.ENSP00000384863	0	0	0	0	0	0.325	0.8	0.915	0.987
MYC	RUVBL1	1856789	1850035	9606.ENSP00000367207	9606.ENSP00000318297	0	0	0	0	0	0.829	0.9	0.3	0.987
GNL3	NOP2	1859893	1858730	9606.ENSP00000395772	9606.ENSP00000382392	0	0	0	0	0	0.985	0	0.204	0.987
POLR2B	CTDP1	1849572	1848076	9606.ENSP00000312735	9606.ENSP00000299543	0	0	0	0	0	0.733	0.9	0.585	0.987
MYC	TBP	1856789	1843249	9606.ENSP00000367207	9606.ENSP00000230354	0	0	0	0	0	0.863	0	0.912	0.987
ETS1	FLT1	1858032	1846791	9606.ENSP00000376436	9606.ENSP00000282397	0	0	0	0	0	0	0.9	0.866	0.986
NUP93	RANBP2	1849329	1846837	9606.ENSP00000310668	9606.ENSP00000283195	0	0	0	0	0	0.306	0.9	0.817	0.986
HMGB1	TBP	1852653	1843249	9606.ENSP00000343040	9606.ENSP00000230354	0	0	0	0	0	0.874	0	0.892	0.986
RAN	NUP153	1857999	1845057	9606.ENSP00000376176	9606.ENSP00000262077	0	0	0	0	0	0.704	0.9	0.58	0.986
TRRAP	TAF6L	1853208	1847468	9606.ENSP00000347733	9606.ENSP00000294168	0	0	0	0	0	0.722	0.9	0.557	0.986
TAF3	TAF12	1852303	1845448	9606.ENSP00000340271	9606.ENSP00000263974	0	0	0	0	0	0.712	0.9	0.58	0.986
GTF2B	KAT2B	1855275	1845408	9606.ENSP00000359531	9606.ENSP00000263754	0	0	0	0	0	0.073	0.9	0.87	0.986
CDK1	NUMA1	1858283	1858116	9606.ENSP00000378699	9606.ENSP00000377298	0	0	0	0	0	0	0.9	0.865	0.986
HNRNPF	HNRNPM	1852109	1850730	9606.ENSP00000338477	9606.ENSP00000325376	0	0	0	0	0	0.765	0.9	0.471	0.986
NUP93	NUP85	1849329	1843765	9606.ENSP00000310668	9606.ENSP00000245544	0	0	0	0	0	0	0.9	0.87	0.986
EP400	MYC	1857832	1856789	9606.ENSP00000374212	9606.ENSP00000367207	0	0	0	0	0	0.9	0	0.866	0.986
HIST2H2AC	EP300	1851443	1845316	9606.ENSP00000332194	9606.ENSP00000263253	0	0	0	0	0	0.965	0	0.622	0.986
NFATC2	EP300	1858353	1845316	9606.ENSP00000379330	9606.ENSP00000263253	0	0	0	0	0	0.576	0.9	0.714	0.986
SIN3A	IKZF1	1854005	1851367	9606.ENSP00000353622	9606.ENSP00000331614	0	0	0	0	0	0.912	0	0.85	0.986
TP53	DGCR8	1846083	1845307	9606.ENSP00000269305	9606.ENSP00000263209	0	0	0	0	0	0	0.9	0.874	0.986
SAP18	RBM39	1857541	1844219	9606.ENSP00000371973	9606.ENSP00000253363	0	0	0	0	0	0.986	0	0	0.986
MYC	MTA1	1856789	1851603	9606.ENSP00000367207	9606.ENSP00000333633	0	0	0	0	0	0	0.9	0.866	0.986
DHX9	PRPF8	1854615	1848629	9606.ENSP00000356520	9606.ENSP00000304350	0	0	0	0	0	0.852	0.9	0.15	0.986
HNRNPD	HNRNPU	1849608	1846836	9606.ENSP00000313199	9606.ENSP00000283179	0	0	0	0	0	0.703	0.9	0.538	0.985
EP400	YEATS4	1857832	1843878	9606.ENSP00000374212	9606.ENSP00000247843	0	0	0	0	0	0.598	0.9	0.672	0.985
H2AFX	HIST3H3	1856252	1854433	9606.ENSP00000364310	9606.ENSP00000355657	0	0	0	0	0	0.664	0.9	0.607	0.985
H2AFV	HIST1H4H	1849067	1847164	9606.ENSP00000308405	9606.ENSP00000289352	0	0	0	0	0	0.961	0	0.638	0.985
AHCTF1	RANBP2	1854384	1846837	9606.ENSP00000355465	9606.ENSP00000283195	0	0	0	0	0	0.491	0.9	0.733	0.985
GTF2H2	MNAT1	1846383	1844871	9606.ENSP00000274400	9606.ENSP00000261245	0	0	0	0	0	0.722	0.9	0.524	0.985
PARP1	PRKDC	1854450	1849621	9606.ENSP00000355759	9606.ENSP00000313420	0	0	0	0	0	0.817	0	0.921	0.985
DHX9	HNRNPU	1854615	1846836	9606.ENSP00000356520	9606.ENSP00000283179	0	0	0	0	0	0.729	0.9	0.501	0.985
HNRNPM	HNRNPL	1850730	1842831	9606.ENSP00000325376	9606.ENSP00000221419	0	0	0	0	0	0.591	0.9	0.68	0.985
NUP93	KPNB1	1849329	1847208	9606.ENSP00000310668	9606.ENSP00000290158	0	0	0	0	0	0.724	0.9	0.506	0.985
TUBB6	TUBA1A	1850072	1848244	9606.ENSP00000318697	9606.ENSP00000301071	0	0	0	0.92	0	0.855	0.9	0.791	0.985
CDC5L	SRRM2	1855491	1848331	9606.ENSP00000360532	9606.ENSP00000301740	0	0	0	0	0	0.98	0	0.289	0.985
CDK1	LMNB1	1858283	1844893	9606.ENSP00000378699	9606.ENSP00000261366	0	0	0	0	0	0.803	0	0.927	0.985
MYC	CDK2	1856789	1845906	9606.ENSP00000367207	9606.ENSP00000266970	0	0	0	0	0	0.167	0.9	0.838	0.985
POLR2A	CCNH	1849743	1844473	9606.ENSP00000314949	9606.ENSP00000256897	0	0	0	0	0	0.696	0.9	0.557	0.985
CDC5L	SNW1	1855491	1844933	9606.ENSP00000360532	9606.ENSP00000261531	0	0	0	0	0	0.977	0	0.378	0.985
AHCTF1	NUP85	1854384	1843765	9606.ENSP00000355465	9606.ENSP00000245544	0	0	0	0	0	0.491	0.9	0.729	0.985
RANGAP1	KPNB1	1853317	1847208	9606.ENSP00000348577	9606.ENSP00000290158	0	0	0	0	0	0.724	0.9	0.526	0.985
PHB	RAF1	1848178	1844086	9606.ENSP00000300408	9606.ENSP00000251849	0	0	0	0	0	0.914	0	0.842	0.985
MYC	TRRAP	1856789	1853208	9606.ENSP00000367207	9606.ENSP00000347733	0	0	0	0	0	0.567	0	0.966	0.985
ERCC2	TP53	1857962	1846083	9606.ENSP00000375809	9606.ENSP00000269305	0	0	0	0	0	0.807	0	0.926	0.985
SAP18	HDAC1	1857541	1855935	9606.ENSP00000371973	9606.ENSP00000362649	0	0	0	0	0	0.683	0.9	0.568	0.985
POLR2A	CCNT2	1849743	1845488	9606.ENSP00000314949	9606.ENSP00000264157	0	0	0	0	0	0.231	0.9	0.813	0.984
CDK1	CDK7	1858283	1844436	9606.ENSP00000378699	9606.ENSP00000256443	0	0	0	0.929	0	0.845	0.9	0.993	0.984
CDK2	CDK7	1845906	1844436	9606.ENSP00000266970	9606.ENSP00000256443	0	0	0	0.937	0	0.842	0.9	0.995	0.984
PSMB10	PSMA4	1853696	1842214	9606.ENSP00000351314	9606.ENSP00000044462	0	0	0	0.654	0	0.832	0.9	0.422	0.984
MYC	CDK9	1856789	1855868	9606.ENSP00000367207	9606.ENSP00000362361	0	0	0	0	0	0.971	0	0.46	0.984
TNPO1	NUP153	1851910	1845057	9606.ENSP00000336712	9606.ENSP00000262077	0	0	0	0	0	0.658	0	0.957	0.984
MEAF6	KAT7	1855823	1844658	9606.ENSP00000362166	9606.ENSP00000259021	0	0	0	0	0	0.72	0.9	0.493	0.984
MEAF6	TRRAP	1855823	1853208	9606.ENSP00000362166	9606.ENSP00000347733	0	0	0	0	0	0.779	0.9	0.37	0.984
POLR2A	SUPT16H	1849743	1842582	9606.ENSP00000314949	9606.ENSP00000216297	0	0	0	0	0	0.465	0.9	0.726	0.984
MTA3	CCNH	1859013	1844473	9606.ENSP00000385045	9606.ENSP00000256897	0	0	0	0	0	0	0.9	0.847	0.984
KPNA2	RANBP2	1851476	1846837	9606.ENSP00000332455	9606.ENSP00000283195	0	0	0	0	0	0.333	0.9	0.786	0.984
RUVBL1	SMARCA5	1850035	1846833	9606.ENSP00000318297	9606.ENSP00000283131	0	0	0	0	0	0.779	0.9	0.352	0.984
SMARCA4	SUPT16H	1853627	1842582	9606.ENSP00000350720	9606.ENSP00000216297	0	0	0	0	0	0.666	0.9	0.575	0.984
TBP	EDF1	1843249	1842992	9606.ENSP00000230354	9606.ENSP00000224073	0	0	0	0	0	0.969	0	0.5	0.984
EP300	EGR1	1845316	1843543	9606.ENSP00000263253	9606.ENSP00000239938	0	0	0	0	0	0.922	0	0.81	0.984
HIST1H2BB	HIST1H2AA	1853610	1847815	9606.ENSP00000350580	9606.ENSP00000297012	0	0	0	0	0	0.721	0.8	0.726	0.983
GTF2B	YY1	1855275	1845097	9606.ENSP00000359531	9606.ENSP00000262238	0	0	0	0	0	0.597	0	0.961	0.983
MYC	YY1	1856789	1845097	9606.ENSP00000367207	9606.ENSP00000262238	0	0	0	0	0	0.576	0.9	0.634	0.983
XRCC6	KAT2B	1853821	1845408	9606.ENSP00000352257	9606.ENSP00000263754	0	0	0	0	0	0.564	0	0.963	0.983
TP53	GAPDH	1846083	1843185	9606.ENSP00000269305	9606.ENSP00000229239	0	0	0	0	0	0.576	0	0.962	0.983
HIST1H3A	CREBBP	1853568	1845124	9606.ENSP00000350275	9606.ENSP00000262367	0	0	0	0	0	0.981	0	0.13	0.983
JUN	TBP	1855436	1843249	9606.ENSP00000360266	9606.ENSP00000230354	0	0	0	0	0	0.935	0	0.758	0.983
HIST1H2AB	HIST1H3B	1844723	1843731	9606.ENSP00000259791	9606.ENSP00000244661	0	0	0	0	0	0.933	0	0.757	0.983
CDK9	ERCC3	1855868	1846961	9606.ENSP00000362361	9606.ENSP00000285398	0	0	0	0	0	0	0.9	0.84	0.983
H2AFV	HIST1H3B	1849067	1843731	9606.ENSP00000308405	9606.ENSP00000244661	0	0	0	0	0	0.965	0	0.55	0.983
EP400	TRRAP	1857832	1853208	9606.ENSP00000374212	9606.ENSP00000347733	0	0	0	0	0	0.596	0.9	0.618	0.983
HIST1H2BJ	HIST1H3B	1852636	1843731	9606.ENSP00000342886	9606.ENSP00000244661	0	0	0	0	0	0.942	0	0.724	0.983
NUP205	NUP153	1846987	1845057	9606.ENSP00000285968	9606.ENSP00000262077	0	0	0	0	0	0.248	0.9	0.801	0.983
HNRNPK	SF3B3	1856467	1848773	9606.ENSP00000365439	9606.ENSP00000305790	0	0	0	0	0	0.815	0.9	0.168	0.983
PBRM1	SMARCA4	1858233	1853627	9606.ENSP00000378307	9606.ENSP00000350720	0	0	0	0.61	0	0.977	0	0.651	0.982
HDAC2	RBL2	1861837	1845071	9606.ENSP00000430432	9606.ENSP00000262133	0	0	0	0	0	0.469	0.9	0.702	0.982
TRRAP	RUVBL1	1853208	1850035	9606.ENSP00000347733	9606.ENSP00000318297	0	0	0	0	0	0.149	0.9	0.811	0.982
ETS1	TP53	1858032	1846083	9606.ENSP00000376436	9606.ENSP00000269305	0	0	0	0	0	0.812	0	0.908	0.982
POLR2A	EP300	1849743	1845316	9606.ENSP00000314949	9606.ENSP00000263253	0	0	0	0	0	0.777	0.9	0.276	0.982
NCL	TP53	1850027	1846083	9606.ENSP00000318195	9606.ENSP00000269305	0	0	0	0	0	0.808	0	0.912	0.982
TP53	APEX1	1846083	1842615	9606.ENSP00000269305	9606.ENSP00000216714	0	0	0	0	0	0.808	0	0.913	0.982
DHX9	POLR2A	1854615	1849743	9606.ENSP00000356520	9606.ENSP00000314949	0	0	0	0	0	0.811	0.9	0.172	0.982
GTF2H3	GTF2B	1862288	1855275	9606.ENSP00000445162	9606.ENSP00000359531	0	0	0	0	0	0.673	0.9	0.519	0.982
ALYREF	HNRNPL	1861534	1842831	9606.ENSP00000421592	9606.ENSP00000221419	0	0	0	0	0	0	0.9	0.836	0.982
KLF5	CEBPB	1856730	1848728	9606.ENSP00000366915	9606.ENSP00000305422	0	0	0	0	0	0	0.9	0.835	0.982
HNRNPK	HNRNPU	1856467	1846836	9606.ENSP00000365439	9606.ENSP00000283179	0	0	0	0	0	0.623	0.9	0.565	0.982
TARBP2	EIF2AK2	1845909	1843335	9606.ENSP00000266987	9606.ENSP00000233057	0	0	0	0	0	0.979	0	0.208	0.982
XPO1	TP53	1858987	1846083	9606.ENSP00000384863	9606.ENSP00000269305	0	0	0	0	0	0.807	0	0.913	0.982
GTPBP4	NSA2	1854068	1847792	9606.ENSP00000354040	9606.ENSP00000296802	0	0	0	0	0	0.953	0	0.642	0.982
GTF2B	TAF4	1855275	1844180	9606.ENSP00000359531	9606.ENSP00000252996	0	0	0	0	0	0	0.9	0.82	0.981
GNB2L1	SDC2	1861691	1848909	9606.ENSP00000426909	9606.ENSP00000307046	0	0	0	0	0	0	0.9	0.824	0.981
BRCA1	POU2F1	1861387	1854675	9606.ENSP00000418960	9606.ENSP00000356840	0	0	0	0	0	0.809	0.9	0.126	0.981
HIST1H3A	KAT2B	1853568	1845408	9606.ENSP00000350275	9606.ENSP00000263754	0	0	0	0	0	0.971	0	0.38	0.981
MCM7	CDK2	1848945	1845906	9606.ENSP00000307288	9606.ENSP00000266970	0	0	0	0	0	0.383	0.9	0.727	0.981
SIN3A	TGIF1	1854005	1850975	9606.ENSP00000353622	9606.ENSP00000327959	0	0	0	0	0	0.812	0.9	0.109	0.981
HIST1H4H	HIST1H2AB	1847164	1844723	9606.ENSP00000289352	9606.ENSP00000259791	0	0	0	0	0	0.933	0	0.735	0.981
ARID2	SMARCC2	1851800	1845915	9606.ENSP00000335044	9606.ENSP00000267064	0	0	0	0	0	0.906	0	0.811	0.981
GTF2H2	CDK7	1846383	1844436	9606.ENSP00000274400	9606.ENSP00000256443	0	0	0	0	0	0.448	0.9	0.683	0.981
MYC	GAPDH	1856789	1843185	9606.ENSP00000367207	9606.ENSP00000229239	0	0	0	0	0	0	0.9	0.821	0.981
CREBBP	YY1	1845124	1845097	9606.ENSP00000262367	9606.ENSP00000262238	0	0	0	0	0	0.594	0.9	0.573	0.981
NUP153	NUP85	1845057	1843765	9606.ENSP00000262077	9606.ENSP00000245544	0	0	0	0	0	0.149	0.9	0.802	0.981
TOP2A	RECQL	1860923	1859865	9606.ENSP00000411532	9606.ENSP00000395449	0	0	0	0	0	0.89	0	0.837	0.981
RELA	REL	1858923	1847519	9606.ENSP00000384273	9606.ENSP00000295025	0	0	0	0.904	0	0.977	0	0.987	0.98
HNRNPK	HNRNPM	1856467	1850730	9606.ENSP00000365439	9606.ENSP00000325376	0	0	0	0	0	0.62	0.9	0.519	0.98
NUP205	RANBP2	1846987	1846837	9606.ENSP00000285968	9606.ENSP00000283195	0	0	0	0	0	0.111	0.9	0.795	0.98
CCNT1	HTATSF1	1845024	1842704	9606.ENSP00000261900	9606.ENSP00000218364	0	0	0	0	0	0.576	0	0.956	0.98
NUP88	NUP153	1863294	1845057	9606.ENSP00000458954	9606.ENSP00000262077	0	0	0	0	0	0	0.9	0.809	0.98
SMARCA5	KAT2B	1846833	1845408	9606.ENSP00000283131	9606.ENSP00000263754	0	0	0	0	0	0.297	0	0.973	0.98
TP53	TAF9	1846083	1842675	9606.ENSP00000269305	9606.ENSP00000217893	0	0	0	0	0	0.962	0	0.505	0.98
RELA	SIRT1	1858923	1842473	9606.ENSP00000384273	9606.ENSP00000212015	0	0	0	0	0	0.812	0	0.896	0.979
HIST1H2BB	HIST1H2AD	1853610	1852412	9606.ENSP00000350580	9606.ENSP00000341094	0	0	0	0	0	0.721	0.8	0.666	0.979
PLK1	TUBA4A	1848135	1843912	9606.ENSP00000300093	9606.ENSP00000248437	0	0	0	0	0	0.684	0.9	0.408	0.979
SUZ12	YY1	1849881	1845097	9606.ENSP00000316578	9606.ENSP00000262238	0	0	0	0	0	0.344	0.9	0.712	0.979
RAN	KPNA2	1857999	1851476	9606.ENSP00000376176	9606.ENSP00000332455	0	0	0	0	0	0.36	0.9	0.699	0.979
RELA	IRF1	1858923	1843757	9606.ENSP00000384273	9606.ENSP00000245414	0	0	0	0	0	0.576	0.9	0.562	0.979
TUBA1A	PLK1	1848244	1848135	9606.ENSP00000301071	9606.ENSP00000300093	0	0	0	0	0	0.684	0.9	0.408	0.979
SIN3A	CHD4	1854005	1853454	9606.ENSP00000353622	9606.ENSP00000349508	0	0	0	0	0	0.6	0.9	0.526	0.979
GTF2B	TAF12	1855275	1845448	9606.ENSP00000359531	9606.ENSP00000263974	0	0	0	0	0	0.36	0.9	0.699	0.979
NPM1	CDK2	1847808	1845906	9606.ENSP00000296930	9606.ENSP00000266970	0	0	0	0	0	0.812	0	0.896	0.979
HNRNPK	HNRNPR	1856467	1856150	9606.ENSP00000365439	9606.ENSP00000363745	0	0	0	0	0	0.602	0.9	0.534	0.979
ILF2	PRKDC	1854278	1849621	9606.ENSP00000355011	9606.ENSP00000313420	0	0	0	0	0	0.865	0	0.854	0.979
CDK9	TP53	1855868	1846083	9606.ENSP00000362361	9606.ENSP00000269305	0	0	0	0	0	0.807	0	0.896	0.979
HMGB1	NFKB1	1852653	1843094	9606.ENSP00000343040	9606.ENSP00000226574	0	0	0	0	0	0.594	0.9	0.535	0.979
HDAC2	SMARCA2	1861837	1845805	9606.ENSP00000430432	9606.ENSP00000265773	0	0	0	0	0	0.914	0	0.766	0.979
HIST1H2BJ	HIST1H4H	1852636	1847164	9606.ENSP00000342886	9606.ENSP00000289352	0	0	0	0	0	0.939	0	0.673	0.979
SMARCA5	KAT2A	1846833	1843061	9606.ENSP00000283131	9606.ENSP00000225916	0	0	0	0	0	0.297	0	0.972	0.979
CDK1	SMC4	1858283	1852454	9606.ENSP00000378699	9606.ENSP00000341382	0	0	0	0	0	0.695	0.9	0.342	0.978
TOP1	TP53	1854138	1846083	9606.ENSP00000354522	9606.ENSP00000269305	0	0	0	0	0	0.917	0	0.754	0.978
CCNT1	CCNH	1845024	1844473	9606.ENSP00000261900	9606.ENSP00000256897	0	0	0	0	0	0	0.9	0.793	0.978
HIST1H2AA	HIST1H2BA	1847815	1846410	9606.ENSP00000297012	9606.ENSP00000274764	0	0	0	0	0	0.721	0.8	0.638	0.978
SMARCA4	KAT2B	1853627	1845408	9606.ENSP00000350720	9606.ENSP00000263754	0	0	0	0	0	0.202	0.9	0.755	0.978
POLR2A	CDK7	1849743	1844436	9606.ENSP00000314949	9606.ENSP00000256443	0	0	0	0	0	0.723	0	0.924	0.978
CDK1	RBL2	1858283	1845071	9606.ENSP00000378699	9606.ENSP00000262133	0	0	0	0	0	0.325	0.9	0.71	0.978
RANBP2	NUP85	1846837	1843765	9606.ENSP00000283195	9606.ENSP00000245544	0	0	0	0	0	0.121	0.9	0.775	0.978
HNRNPK	DHX9	1856467	1854615	9606.ENSP00000365439	9606.ENSP00000356520	0	0	0	0	0	0.702	0.9	0.343	0.978
HIST1H4A	KAT2B	1853925	1845408	9606.ENSP00000352980	9606.ENSP00000263754	0	0	0	0	0	0.969	0	0.33	0.978
CREBBP	IRF1	1845124	1843757	9606.ENSP00000262367	9606.ENSP00000245414	0	0	0	0	0	0.564	0.9	0.54	0.978
TOP1	NCL	1854138	1850027	9606.ENSP00000354522	9606.ENSP00000318195	0	0	0	0	0	0.955	0	0.532	0.978
PARP1	CREBBP	1854450	1845124	9606.ENSP00000355759	9606.ENSP00000262367	0	0	0	0	0	0.077	0.9	0.788	0.978
RANBP2	NUP153	1846837	1845057	9606.ENSP00000283195	9606.ENSP00000262077	0	0	0	0.617	0	0.683	0.9	0.922	0.978
RUVBL2	TRRAP	1864926	1853208	9606.ENSP00000473172	9606.ENSP00000347733	0	0	0	0	0	0.149	0.9	0.768	0.978
TAF15	TBP	1863971	1843249	9606.ENSP00000466950	9606.ENSP00000230354	0	0	0	0	0	0.808	0	0.885	0.977
WHSC1	HDAC1	1857585	1855935	9606.ENSP00000372347	9606.ENSP00000362649	0	0	0	0	0	0.969	0	0.293	0.977
RBBP4	HIST1H3A	1855919	1853568	9606.ENSP00000362592	9606.ENSP00000350275	0	0	0	0	0	0.961	0	0.425	0.977
CEBPB	CREBBP	1848728	1845124	9606.ENSP00000305422	9606.ENSP00000262367	0	0	0	0	0	0.576	0.9	0.506	0.977
ALYREF	DDX3X	1861534	1858776	9606.ENSP00000421592	9606.ENSP00000382840	0	0	0	0	0	0.971	0	0.243	0.977
XPO1	DDX3X	1858987	1858776	9606.ENSP00000384863	9606.ENSP00000382840	0	0	0	0	0	0.576	0	0.948	0.977
NOP2	FBL	1858730	1842861	9606.ENSP00000382392	9606.ENSP00000221801	0	0	0	0	0	0.93	0	0.683	0.977
HDAC2	HIST2H2AC	1861837	1851443	9606.ENSP00000430432	9606.ENSP00000332194	0	0	0	0	0	0.624	0.8	0.726	0.977
HIST3H3	KAT5	1854433	1852315	9606.ENSP00000355657	9606.ENSP00000340330	0	0	0	0	0	0.666	0.9	0.376	0.977
NOP2	GTPBP4	1858730	1854068	9606.ENSP00000382392	9606.ENSP00000354040	0	0	0	0	0	0.951	0	0.551	0.977
HNRNPM	SF3B3	1850730	1848773	9606.ENSP00000325376	9606.ENSP00000305790	0	0	0	0	0	0.733	0.9	0.241	0.977
AFF4	MLLT1	1845731	1844149	9606.ENSP00000265343	9606.ENSP00000252674	0	0	0	0	0	0.955	0	0.509	0.977
H3F3A	HIST1H4A	1854454	1853925	9606.ENSP00000355778	9606.ENSP00000352980	0	0	0	0	0	0.932	0	0.672	0.977
HNRNPR	HNRNPL	1856150	1842831	9606.ENSP00000363745	9606.ENSP00000221419	0	0	0	0	0	0.573	0.9	0.508	0.977
SP3	EP300	1849281	1845316	9606.ENSP00000310301	9606.ENSP00000263253	0	0	0	0	0	0.962	0	0.377	0.976
CDK2	PSMA6	1845906	1844920	9606.ENSP00000266970	9606.ENSP00000261479	0	0	0	0	0	0.691	0.9	0.31	0.976
ACTL6A	YY1	1860014	1845097	9606.ENSP00000397552	9606.ENSP00000262238	0	0	0	0	0	0.7	0.9	0.283	0.976
NCL	FBL	1850027	1842861	9606.ENSP00000318195	9606.ENSP00000221801	0	0	0	0	0	0.569	0	0.947	0.976
CDC5L	SF3B3	1855491	1848773	9606.ENSP00000360532	9606.ENSP00000305790	0	0	0	0	0	0.963	0	0.386	0.976
RECQL	PARP1	1859865	1854450	9606.ENSP00000395449	9606.ENSP00000355759	0	0	0	0	0	0.566	0	0.947	0.976
GRB2	FLT1	1852164	1846791	9606.ENSP00000339007	9606.ENSP00000282397	0	0	0	0	0	0.629	0.9	0.412	0.976
ACTL6A	PBRM1	1860014	1858233	9606.ENSP00000397552	9606.ENSP00000378307	0	0	0	0	0	0.923	0	0.702	0.976
HNRNPH1	HNRNPM	1853404	1850730	9606.ENSP00000349168	9606.ENSP00000325376	0	0	0	0	0	0.563	0.9	0.496	0.976
ERCC3	GTF2H2	1846961	1846383	9606.ENSP00000285398	9606.ENSP00000274400	0	0	0	0	0	0	0.9	0.773	0.976
XRCC6	KAT2A	1853821	1843061	9606.ENSP00000352257	9606.ENSP00000225916	0	0	0	0	0	0.569	0	0.946	0.976
GRIN1	GRIN2D	1855505	1845322	9606.ENSP00000360608	9606.ENSP00000263269	0	0	0	0.692	0	0.687	0.9	0.899	0.976
PRPF8	SNW1	1848629	1844933	9606.ENSP00000304350	9606.ENSP00000261531	0	0	0	0	0	0.971	0	0.206	0.976
APP	LRP1	1846936	1843653	9606.ENSP00000284981	9606.ENSP00000243077	0	0	0	0	0	0.915	0	0.735	0.976
NUP205	NUP85	1846987	1843765	9606.ENSP00000285968	9606.ENSP00000245544	0	0	0	0	0	0	0.9	0.778	0.976
PSMA7	PSMB10	1855365	1853696	9606.ENSP00000359910	9606.ENSP00000351314	0	0	0	0.655	0	0.723	0.9	0.577	0.976
RBBP7	SMARCA5	1857150	1846833	9606.ENSP00000369424	9606.ENSP00000283131	0	0	0	0	0	0.254	0.9	0.714	0.976
NUP88	NUP85	1863294	1843765	9606.ENSP00000458954	9606.ENSP00000245544	0	0	0	0	0	0	0.9	0.767	0.975
CCNH	CCNB1	1844473	1844435	9606.ENSP00000256897	9606.ENSP00000256442	0	0	0	0	0	0.078	0.9	0.754	0.975
RUVBL2	HDAC1	1864926	1855935	9606.ENSP00000473172	9606.ENSP00000362649	0	0	0	0	0	0.962	0	0.36	0.975
GATA3	EP300	1857010	1845316	9606.ENSP00000368632	9606.ENSP00000263253	0	0	0	0	0	0.098	0.9	0.749	0.975
HDAC1	UBTF	1855935	1848435	9606.ENSP00000362649	9606.ENSP00000302640	0	0	0	0	0	0.613	0.9	0.421	0.975
TAF7	CCNT1	1849570	1845024	9606.ENSP00000312709	9606.ENSP00000261900	0	0	0	0	0	0.566	0	0.945	0.975
ACTL6A	MEAF6	1860014	1855823	9606.ENSP00000397552	9606.ENSP00000362166	0	0	0	0	0	0.631	0.9	0.399	0.975
SMARCA4	PHB	1853627	1848178	9606.ENSP00000350720	9606.ENSP00000300408	0	0	0	0	0	0.807	0	0.877	0.975
TAF6L	KAT2A	1847468	1843061	9606.ENSP00000294168	9606.ENSP00000225916	0	0	0	0	0	0.565	0.9	0.473	0.975
NPM1	NSUN2	1847808	1845592	9606.ENSP00000296930	9606.ENSP00000264670	0	0	0	0	0	0.576	0.9	0.459	0.975
POU2F1	TBP	1854675	1843249	9606.ENSP00000356840	9606.ENSP00000230354	0	0	0	0	0	0.576	0.9	0.459	0.975
HDAC1	PHB	1855935	1848178	9606.ENSP00000362649	9606.ENSP00000300408	0	0	0	0	0	0.96	0	0.394	0.974
HIST1H2AB	H3F3B	1844723	1844327	9606.ENSP00000259791	9606.ENSP00000254810	0	0	0	0	0	0.933	0	0.635	0.974
RUVBL1	YY1	1850035	1845097	9606.ENSP00000318297	9606.ENSP00000262238	0	0	0	0	0	0.707	0.9	0.181	0.974
SMARCA5	SMARCC2	1846833	1845915	9606.ENSP00000283131	9606.ENSP00000267064	0	0	0	0	0	0.938	0	0.608	0.974
HNRNPM	PRPF8	1850730	1848629	9606.ENSP00000325376	9606.ENSP00000304350	0	0	0	0	0	0.723	0.9	0.143	0.974
PCBP1	PRPF8	1848744	1848629	9606.ENSP00000305556	9606.ENSP00000304350	0	0	0	0	0	0.754	0.9	0.059	0.974
BRCA1	CCNE1	1861387	1845190	9606.ENSP00000418960	9606.ENSP00000262643	0	0	0	0	0	0.556	0.9	0.471	0.974
JUN	SMARCB1	1855436	1845291	9606.ENSP00000360266	9606.ENSP00000263121	0	0	0	0	0	0.663	0.9	0.316	0.974
RUVBL2	H2AFZ	1864926	1847723	9606.ENSP00000473172	9606.ENSP00000296417	0	0	0	0	0	0.939	0	0.595	0.974
SIN3A	SMARCA2	1854005	1845805	9606.ENSP00000353622	9606.ENSP00000265773	0	0	0	0	0	0.943	0	0.573	0.974
HIST1H3A	SETD7	1853568	1846356	9606.ENSP00000350275	9606.ENSP00000274031	0	0	0	0	0	0.968	0	0.222	0.974
SF3B1	HTATSF1	1851836	1842704	9606.ENSP00000335321	9606.ENSP00000218364	0	0	0	0	0	0.95	0	0.507	0.974
H2AFY	PARP1	1861595	1854450	9606.ENSP00000423563	9606.ENSP00000355759	0	0	0	0	0	0.81	0	0.869	0.974
EIF3B	PABPC1	1854079	1849591	9606.ENSP00000354125	9606.ENSP00000313007	0	0	0	0	0	0.224	0.9	0.697	0.974
HIST1H2BK	HIST1H4H	1853439	1847164	9606.ENSP00000349430	9606.ENSP00000289352	0	0	0	0	0	0.925	0	0.665	0.973
TP73	TP53	1856848	1846083	9606.ENSP00000367545	9606.ENSP00000269305	0	0	0	0.895	0	0.718	0.9	0.855	0.973
HIST1H2BJ	H3F3B	1852636	1844327	9606.ENSP00000342886	9606.ENSP00000254810	0	0	0	0	0	0.942	0	0.561	0.973
CDK2	MCM6	1845906	1845487	9606.ENSP00000266970	9606.ENSP00000264156	0	0	0	0	0	0.383	0.9	0.611	0.973
CSNK2A2	NFKBIA	1845161	1842621	9606.ENSP00000262506	9606.ENSP00000216797	0	0	0	0	0	0.299	0.8	0.824	0.973
SAP18	SAP30	1857541	1847743	9606.ENSP00000371973	9606.ENSP00000296504	0	0	0	0	0	0	0.9	0.746	0.973
EIF3A	PABPC1	1854958	1849591	9606.ENSP00000358140	9606.ENSP00000313007	0	0	0	0	0	0.436	0.9	0.571	0.973
MYC	CCNE1	1856789	1845190	9606.ENSP00000367207	9606.ENSP00000262643	0	0	0	0	0	0	0.9	0.749	0.973
HNRNPH1	HNRNPH3	1853404	1845819	9606.ENSP00000349168	9606.ENSP00000265866	0	0	0	0.958	0	0.973	0	0.759	0.973
WDR5	TAF1	1853715	1846471	9606.ENSP00000351446	9606.ENSP00000276072	0	0	0	0	0	0.664	0.9	0.276	0.973
HIST1H2BM	H2AFZ	1853848	1847723	9606.ENSP00000352442	9606.ENSP00000296417	0	0	0	0	0	0.515	0.8	0.746	0.973
RAN	IPO5	1857999	1844939	9606.ENSP00000376176	9606.ENSP00000261574	0	0	0	0	0	0.927	0	0.647	0.973
GTF2B	TAF5	1855275	1855115	9606.ENSP00000359531	9606.ENSP00000358854	0	0	0	0	0	0	0.9	0.747	0.973
CLOCK	EP300	1849105	1845316	9606.ENSP00000308741	9606.ENSP00000263253	0	0	0	0	0	0.57	0.9	0.44	0.973
ERCC3	TBP	1846961	1843249	9606.ENSP00000285398	9606.ENSP00000230354	0	0	0	0	0	0	0.9	0.743	0.973
SF3B1	HNRNPM	1851836	1850730	9606.ENSP00000335321	9606.ENSP00000325376	0	0	0	0	0	0.731	0.9	0.085	0.973
HNRNPK	HNRNPH1	1856467	1853404	9606.ENSP00000365439	9606.ENSP00000349168	0	0	0	0	0	0.422	0.9	0.583	0.973
HDAC2	H2AFY	1861837	1861595	9606.ENSP00000430432	9606.ENSP00000423563	0	0	0	0	0	0.729	0.8	0.552	0.973
CDK7	CCNB1	1844436	1844435	9606.ENSP00000256443	9606.ENSP00000256442	0	0	0	0	0	0.1	0.9	0.715	0.972
H2AFX	PARP1	1856252	1854450	9606.ENSP00000364310	9606.ENSP00000355759	0	0	0	0	0	0.932	0	0.613	0.972
MEAF6	YEATS4	1855823	1843878	9606.ENSP00000362166	9606.ENSP00000247843	0	0	0	0	0	0.407	0.9	0.567	0.972
EIF3F	CSNK2A2	1849251	1845161	9606.ENSP00000310040	9606.ENSP00000262506	0	0	0	0	0	0.973	0	0	0.972
HDAC2	SAP18	1861837	1857541	9606.ENSP00000430432	9606.ENSP00000371973	0	0	0	0	0	0.299	0.9	0.632	0.972
HDAC1	SUZ12	1855935	1849881	9606.ENSP00000362649	9606.ENSP00000316578	0	0	0	0	0	0.552	0.9	0.425	0.972
UBTF	FBL	1848435	1842861	9606.ENSP00000302640	9606.ENSP00000221801	0	0	0	0	0	0.545	0	0.942	0.972
GRIN2A	GRIN2B	1851485	1846639	9606.ENSP00000332549	9606.ENSP00000279593	0	0	0	0.953	0	0.726	0.9	0.988	0.972
NFKB2	REL	1855147	1847519	9606.ENSP00000358983	9606.ENSP00000295025	0	0	0	0.776	0	0.965	0	0.93	0.972
XRCC5	H2AFX	1857983	1856252	9606.ENSP00000375977	9606.ENSP00000364310	0	0	0	0	0	0.852	0	0.82	0.972
RUVBL1	H2AFZ	1850035	1847723	9606.ENSP00000318297	9606.ENSP00000296417	0	0	0	0	0	0.94	0	0.563	0.972
RUNX1	CREBBP	1848173	1845124	9606.ENSP00000300305	9606.ENSP00000262367	0	0	0	0	0	0.805	0	0.865	0.972
HNRNPR	HNRNPH1	1856150	1853404	9606.ENSP00000363745	9606.ENSP00000349168	0	0	0	0	0	0.587	0.9	0.398	0.972
TAF3	TAF7	1852303	1849570	9606.ENSP00000340271	9606.ENSP00000312709	0	0	0	0	0	0.569	0.9	0.412	0.972
GTF2H3	POLR2A	1862288	1849743	9606.ENSP00000445162	9606.ENSP00000314949	0	0	0	0	0	0.599	0.9	0.358	0.972
POLR2A	TAF10	1849743	1848061	9606.ENSP00000314949	9606.ENSP00000299424	0	0	0	0	0	0.68	0.9	0.201	0.972
SIN3A	KLF16	1854005	1844028	9606.ENSP00000353622	9606.ENSP00000250916	0	0	0	0	0	0.966	0	0.199	0.972
CDK1	PLK1	1858283	1848135	9606.ENSP00000378699	9606.ENSP00000300093	0	0	0	0.669	0	0.611	0.9	0.986	0.972
NCAPD2	NUP153	1850703	1845057	9606.ENSP00000325017	9606.ENSP00000262077	0	0	0	0	0	0.972	0	0	0.972
RECQL	XRCC6	1859865	1853821	9606.ENSP00000395449	9606.ENSP00000352257	0	0	0	0	0	0.923	0	0.634	0.971
HNRNPR	HNRNPF	1856150	1852109	9606.ENSP00000363745	9606.ENSP00000338477	0	0	0	0	0	0.583	0.9	0.361	0.971
ILF3	PRKDC	1860459	1849621	9606.ENSP00000404121	9606.ENSP00000313420	0	0	0	0	0	0.807	0	0.86	0.971
SENP3	WDR5	1860430	1853715	9606.ENSP00000403712	9606.ENSP00000351446	0	0	0	0	0	0.709	0.9	0.115	0.971
SMARCC2	CREBBP	1845915	1845124	9606.ENSP00000267064	9606.ENSP00000262367	0	0	0	0	0	0.686	0.9	0.16	0.971
HIST1H2BM	H2AFV	1853848	1849067	9606.ENSP00000352442	9606.ENSP00000308405	0	0	0	0	0	0.515	0.8	0.726	0.971
SIN3A	SFPQ	1854005	1853490	9606.ENSP00000353622	9606.ENSP00000349748	0	0	0	0	0	0.961	0	0.297	0.971
SIN3A	MBD2	1854005	1844432	9606.ENSP00000353622	9606.ENSP00000256429	0	0	0	0	0	0.576	0.9	0.372	0.971
POU2F1	SP1	1854675	1851138	9606.ENSP00000356840	9606.ENSP00000329357	0	0	0	0	0	0.963	0	0.264	0.971
AFF1	CCNT1	1858274	1845024	9606.ENSP00000378578	9606.ENSP00000261900	0	0	0	0	0	0.958	0	0.351	0.971
TUBB2A	TUBA1C	1857206	1848245	9606.ENSP00000369703	9606.ENSP00000301072	0	0	0	0.919	0	0.693	0.9	0.873	0.97
MYC	HDAC1	1856789	1855935	9606.ENSP00000367207	9606.ENSP00000362649	0	0	0	0	0	0.921	0	0.644	0.97
RBBP7	MBD2	1857150	1844432	9606.ENSP00000369424	9606.ENSP00000256429	0	0	0	0	0	0.573	0.9	0.368	0.97
JUN	CEBPB	1855436	1848728	9606.ENSP00000360266	9606.ENSP00000305422	0	0	0	0	0	0	0.9	0.72	0.97
XRCC6	CREBBP	1853821	1845124	9606.ENSP00000352257	9606.ENSP00000262367	0	0	0	0	0	0.804	0	0.855	0.97
CHD4	IKZF1	1853454	1851367	9606.ENSP00000349508	9606.ENSP00000331614	0	0	0	0	0	0.787	0	0.865	0.97
HNRNPF	HNRNPH3	1852109	1845819	9606.ENSP00000338477	9606.ENSP00000265866	0	0	0	0.957	0	0.969	0	0.86	0.97
SMARCB1	YEATS4	1845291	1843878	9606.ENSP00000263121	9606.ENSP00000247843	0	0	0	0	0	0.768	0	0.876	0.97
EP300	KAT2A	1845316	1843061	9606.ENSP00000263253	9606.ENSP00000225916	0	0	0	0	0	0.689	0	0.907	0.97
HIST1H2BO	H2AFZ	1848526	1847723	9606.ENSP00000303408	9606.ENSP00000296417	0	0	0	0	0	0.318	0.8	0.8	0.97
H2AFX	HIST1H2BM	1856252	1853848	9606.ENSP00000364310	9606.ENSP00000352442	0	0	0	0	0	0.668	0.8	0.585	0.97
MITF	EP300	1847592	1845316	9606.ENSP00000295600	9606.ENSP00000263253	0	0	0	0	0	0.594	0.9	0.325	0.97
CHD4	UBTF	1853454	1848435	9606.ENSP00000349508	9606.ENSP00000302640	0	0	0	0	0	0.149	0.9	0.677	0.97
GTF2B	SMARCA4	1855275	1853627	9606.ENSP00000359531	9606.ENSP00000350720	0	0	0	0	0	0.073	0.9	0.709	0.97
TUBB4B	TUBA1C	1852441	1848245	9606.ENSP00000341289	9606.ENSP00000301072	0	0	0	0.919	0	0.693	0.9	0.847	0.97
ITGB1	THBS1	1848520	1844779	9606.ENSP00000303351	9606.ENSP00000260356	0	0	0	0	0	0.576	0.9	0.332	0.969
GTPBP4	PES1	1854068	1853086	9606.ENSP00000354040	9606.ENSP00000346725	0	0	0	0	0	0.953	0	0.384	0.969
SMC4	PLK1	1852454	1848135	9606.ENSP00000341382	9606.ENSP00000300093	0	0	0	0	0	0.574	0.9	0.335	0.969
RELA	BCL10	1858923	1846181	9606.ENSP00000384273	9606.ENSP00000271015	0	0	0	0	0	0.564	0.9	0.356	0.969
HIST1H4H	HIST1H2BA	1847164	1846410	9606.ENSP00000289352	9606.ENSP00000274764	0	0	0	0	0	0.925	0	0.606	0.969
GTF2H3	TBP	1862288	1843249	9606.ENSP00000445162	9606.ENSP00000230354	0	0	0	0	0	0.599	0.9	0.296	0.969
DHX9	DDX5	1854615	1843052	9606.ENSP00000356520	9606.ENSP00000225792	0	0	0	0	0	0.752	0	0.883	0.969
HIST3H3	HIST1H4H	1854433	1847164	9606.ENSP00000355657	9606.ENSP00000289352	0	0	0	0	0	0.927	0	0.593	0.969
ORC5	MCM6	1847866	1845487	9606.ENSP00000297431	9606.ENSP00000264156	0	0	0	0	0	0.304	0.9	0.597	0.969
TUBB6	TUBA4A	1850072	1843912	9606.ENSP00000318697	9606.ENSP00000248437	0	0	0	0.922	0	0.688	0.9	0.753	0.969
TUBA1B	TUBB1	1851928	1842641	9606.ENSP00000336799	9606.ENSP00000217133	0	0	0	0.908	0	0.685	0.9	0.675	0.969
TAF2	KAT2B	1856824	1845408	9606.ENSP00000367406	9606.ENSP00000263754	0	0	0	0	0	0.299	0.9	0.598	0.969
DHX9	HNRNPM	1854615	1850730	9606.ENSP00000356520	9606.ENSP00000325376	0	0	0	0	0	0.589	0.9	0.311	0.969
TAF7	KAT2B	1849570	1845408	9606.ENSP00000312709	9606.ENSP00000263754	0	0	0	0	0	0.374	0.9	0.548	0.969
EP400	YY1	1857832	1845097	9606.ENSP00000374212	9606.ENSP00000262238	0	0	0	0	0	0.099	0.9	0.693	0.969
SAP18	RBBP7	1857541	1857150	9606.ENSP00000371973	9606.ENSP00000369424	0	0	0	0	0	0	0.9	0.702	0.969
HNRNPK	KHDRBS1	1856467	1849655	9606.ENSP00000365439	9606.ENSP00000313829	0	0	0	0	0	0.892	0	0.718	0.968
CHD4	KAT2B	1853454	1845408	9606.ENSP00000349508	9606.ENSP00000263754	0	0	0	0	0	0.441	0.9	0.489	0.968
CREB1	CEBPB	1859295	1848728	9606.ENSP00000387699	9606.ENSP00000305422	0	0	0	0	0	0.576	0	0.927	0.968
HDAC1	SMARCA2	1855935	1845805	9606.ENSP00000362649	9606.ENSP00000265773	0	0	0	0	0	0.87	0	0.769	0.968
JUN	PRKDC	1855436	1849621	9606.ENSP00000360266	9606.ENSP00000313420	0	0	0	0	0	0.692	0	0.9	0.968
RELA	EGR1	1858923	1843543	9606.ENSP00000384273	9606.ENSP00000239938	0	0	0	0	0	0.576	0	0.928	0.968
ALYREF	YBX1	1861534	1855704	9606.ENSP00000421592	9606.ENSP00000361626	0	0	0	0	0	0.644	0.9	0.178	0.968
HIST1H2AM	HIST1H2BO	1853877	1848526	9606.ENSP00000352627	9606.ENSP00000303408	0	0	0	0	0	0.251	0.8	0.804	0.968
POLR2B	TBP	1849572	1843249	9606.ENSP00000312735	9606.ENSP00000230354	0	0	0	0	0	0	0.9	0.694	0.968
HDAC1	CDK2	1855935	1845906	9606.ENSP00000362649	9606.ENSP00000266970	0	0	0	0	0	0.305	0.9	0.583	0.968
HIST1H2BO	HIST1H2AE	1848526	1848523	9606.ENSP00000303408	9606.ENSP00000303373	0	0	0	0	0	0.251	0.8	0.809	0.968
ALYREF	NUP93	1861534	1849329	9606.ENSP00000421592	9606.ENSP00000310668	0	0	0	0	0	0.686	0.9	0.086	0.968
H2AFZ	HIST1H2BA	1847723	1846410	9606.ENSP00000296417	9606.ENSP00000274764	0	0	0	0	0	0.318	0.8	0.786	0.968
MTA1	MTA2	1851603	1846587	9606.ENSP00000333633	9606.ENSP00000278823	0	0	0	0.968	0	0.69	0.9	0.802	0.968
HIST1H2BB	H2AFZ	1853610	1847723	9606.ENSP00000350580	9606.ENSP00000296417	0	0	0	0	0	0.318	0.8	0.789	0.968
POLR2A	MNAT1	1849743	1844871	9606.ENSP00000314949	9606.ENSP00000261245	0	0	0	0	0	0.569	0.9	0.321	0.968
XRCC5	TP53	1857983	1846083	9606.ENSP00000375977	9606.ENSP00000269305	0	0	0	0	0	0	0.9	0.7	0.968
NUP88	NUP205	1863294	1846987	9606.ENSP00000458954	9606.ENSP00000285968	0	0	0	0	0	0	0.9	0.698	0.968
YBX1	PCBP2	1855704	1853847	9606.ENSP00000361626	9606.ENSP00000352438	0	0	0	0	0	0.566	0.9	0.326	0.968
RUNX1	ELF2	1848173	1845760	9606.ENSP00000300305	9606.ENSP00000265495	0	0	0	0	0	0.82	0	0.824	0.967
HDAC1	IKZF1	1855935	1851367	9606.ENSP00000362649	9606.ENSP00000331614	0	0	0	0	0	0.94	0	0.472	0.967
HDAC2	TBP	1861837	1843249	9606.ENSP00000430432	9606.ENSP00000230354	0	0	0	0	0	0	0.9	0.69	0.967
PARP1	EP300	1854450	1845316	9606.ENSP00000355759	9606.ENSP00000263253	0	0	0	0	0	0.817	0	0.826	0.967
ETS1	RUNX1	1858032	1848173	9606.ENSP00000376436	9606.ENSP00000300305	0	0	0	0	0	0.564	0	0.929	0.967
KLF5	NFKB1	1856730	1843094	9606.ENSP00000366915	9606.ENSP00000226574	0	0	0	0	0	0.598	0.9	0.251	0.967
TNPO1	HNRNPM	1851910	1850730	9606.ENSP00000336712	9606.ENSP00000325376	0	0	0	0	0	0.96	0	0.197	0.967
ERCC2	POLR2A	1857962	1849743	9606.ENSP00000375809	9606.ENSP00000314949	0	0	0	0	0	0.316	0.9	0.56	0.967
SDC2	SDC1	1848909	1844292	9606.ENSP00000307046	9606.ENSP00000254351	0	0	0	0.703	0	0.566	0.9	0.961	0.967
TP53	BHLHE40	1846083	1844442	9606.ENSP00000269305	9606.ENSP00000256495	0	0	0	0	0	0.809	0	0.836	0.967
HMGB1	CREBBP	1852653	1845124	9606.ENSP00000343040	9606.ENSP00000262367	0	0	0	0	0	0.594	0.9	0.268	0.967
GTF2B	EP300	1855275	1845316	9606.ENSP00000359531	9606.ENSP00000263253	0	0	0	0	0	0.58	0	0.924	0.967
XRCC6	POLM	1853821	1843616	9606.ENSP00000352257	9606.ENSP00000242248	0	0	0	0	0	0.26	0.9	0.592	0.967
HIST1H2BK	HIST1H3B	1853439	1843731	9606.ENSP00000349430	9606.ENSP00000244661	0	0	0	0	0	0.926	0	0.561	0.966
RECQL	MLH1	1859865	1843304	9606.ENSP00000395449	9606.ENSP00000231790	0	0	0	0	0	0.829	0	0.813	0.966
SENP3	NPM1	1860430	1847808	9606.ENSP00000403712	9606.ENSP00000296930	0	0	0	0	0	0.747	0	0.874	0.966
RELA	HMGB1	1858923	1852653	9606.ENSP00000384273	9606.ENSP00000343040	0	0	0	0	0	0.576	0.9	0.283	0.966
HIST3H3	HIST1H2BJ	1854433	1852636	9606.ENSP00000355657	9606.ENSP00000342886	0	0	0	0	0	0.926	0	0.561	0.966
CDK9	PAF1	1855868	1842822	9606.ENSP00000362361	9606.ENSP00000221265	0	0	0	0	0	0.681	0.9	0	0.966
TP73	MYC	1856848	1856789	9606.ENSP00000367545	9606.ENSP00000367207	0	0	0	0	0	0.812	0	0.827	0.966
NAP1L4	PES1	1857242	1853086	9606.ENSP00000369915	9606.ENSP00000346725	0	0	0	0	0	0.966	0	0	0.966
GTF3C5	TBP	1855620	1843249	9606.ENSP00000361180	9606.ENSP00000230354	0	0	0	0	0	0.574	0.9	0.27	0.966
TRRAP	TAF7	1853208	1849570	9606.ENSP00000347733	9606.ENSP00000312709	0	0	0	0	0	0.58	0.9	0.262	0.966
RELA	DHX9	1858923	1854615	9606.ENSP00000384273	9606.ENSP00000356520	0	0	0	0	0	0.648	0.9	0.129	0.966
HIST1H2BJ	HIST1H2AB	1852636	1844723	9606.ENSP00000342886	9606.ENSP00000259791	0	0	0	0	0	0.927	0	0.564	0.966
HIST1H2BA	HIST1H3B	1846410	1843731	9606.ENSP00000274764	9606.ENSP00000244661	0	0	0	0	0	0.926	0	0.561	0.966
SDC3	SDC1	1852820	1844292	9606.ENSP00000344468	9606.ENSP00000254351	0	0	0	0.681	0	0.566	0.9	0.813	0.966
EP300	SNW1	1845316	1844933	9606.ENSP00000263253	9606.ENSP00000261531	0	0	0	0	0	0.566	0.9	0.289	0.966
DMAP1	H2AFZ	1849566	1847723	9606.ENSP00000312697	9606.ENSP00000296417	0	0	0	0	0	0.918	0	0.602	0.966
ALYREF	HNRNPM	1861534	1850730	9606.ENSP00000421592	9606.ENSP00000325376	0	0	0	0.66	0	0.66	0.9	0.18	0.966
POLR2A	SSRP1	1849743	1846565	9606.ENSP00000314949	9606.ENSP00000278412	0	0	0	0	0	0.501	0.9	0.388	0.966
KAT5	UBTF	1852315	1848435	9606.ENSP00000340330	9606.ENSP00000302640	0	0	0	0	0	0.807	0	0.829	0.965
SMARCA4	IRF1	1853627	1843757	9606.ENSP00000350720	9606.ENSP00000245414	0	0	0	0	0	0.564	0.9	0.266	0.965
HDAC1	SFPQ	1855935	1853490	9606.ENSP00000362649	9606.ENSP00000349748	0	0	0	0	0	0.962	0	0.138	0.965
HNRNPK	PCBP2	1856467	1853847	9606.ENSP00000365439	9606.ENSP00000352438	0	0	0	0.757	0	0.57	0.9	0.948	0.965
GTF2B	GTF2H1	1855275	1845828	9606.ENSP00000359531	9606.ENSP00000265963	0	0	0	0	0	0	0.9	0.668	0.965
YBX1	SNRNP200	1855704	1849929	9606.ENSP00000361626	9606.ENSP00000317123	0	0	0	0	0	0.67	0.9	0	0.965
SF3B3	SNW1	1848773	1844933	9606.ENSP00000305790	9606.ENSP00000261531	0	0	0	0	0	0.956	0	0.25	0.965
JUN	SMARCA4	1855436	1853627	9606.ENSP00000360266	9606.ENSP00000350720	0	0	0	0	0	0.361	0.9	0.505	0.965
SAP30	YY1	1847743	1845097	9606.ENSP00000296504	9606.ENSP00000262238	0	0	0	0	0	0.576	0.9	0.247	0.965
MTA2	TP53	1846587	1846083	9606.ENSP00000278823	9606.ENSP00000269305	0	0	0	0	0	0.779	0	0.851	0.965
SDC3	SDC2	1852820	1848909	9606.ENSP00000344468	9606.ENSP00000307046	0	0	0	0.709	0	0.566	0.9	0.812	0.965
BCL10	NFKBIA	1846181	1842621	9606.ENSP00000271015	9606.ENSP00000216797	0	0	0	0	0	0.57	0.9	0.27	0.965
HNRNPK	PABPC1	1856467	1849591	9606.ENSP00000365439	9606.ENSP00000313007	0	0	0	0	0	0.937	0	0.472	0.965
XPO1	NUP98	1858987	1849839	9606.ENSP00000384863	9606.ENSP00000316032	0	0	0	0	0	0.303	0	0.951	0.964
TNPO1	NUP98	1851910	1849839	9606.ENSP00000336712	9606.ENSP00000316032	0	0	0	0	0	0.925	0	0.546	0.964
BIRC5	TP53	1848314	1846083	9606.ENSP00000301633	9606.ENSP00000269305	0	0	0	0	0	0	0	0.963	0.964
HIST1H2BA	HIST1H2AB	1846410	1844723	9606.ENSP00000274764	9606.ENSP00000259791	0	0	0	0	0	0.921	0	0.564	0.964
ERCC2	GTF2B	1857962	1855275	9606.ENSP00000375809	9606.ENSP00000359531	0	0	0	0	0	0	0.9	0.664	0.964
HNRNPR	HNRNPD	1856150	1849608	9606.ENSP00000363745	9606.ENSP00000313199	0	0	0	0.635	0	0.592	0.9	0.472	0.964
HIST3H2BB	H2AFZ	1857956	1847723	9606.ENSP00000375736	9606.ENSP00000296417	0	0	0	0	0	0.318	0.8	0.762	0.964
HIST1H1B	CCNE1	1851214	1845190	9606.ENSP00000330074	9606.ENSP00000262643	0	0	0	0	0	0.961	0	0.104	0.964
HNRNPR	HNRNPM	1856150	1850730	9606.ENSP00000363745	9606.ENSP00000325376	0	0	0	0	0	0.402	0.9	0.447	0.964
HIST1H2BK	HIST1H2AB	1853439	1844723	9606.ENSP00000349430	9606.ENSP00000259791	0	0	0	0	0	0.921	0	0.564	0.964
GTF2B	TAF13	1855275	1854288	9606.ENSP00000359531	9606.ENSP00000355051	0	0	0	0	0	0	0.9	0.658	0.964
PLK1	KAT7	1848135	1844658	9606.ENSP00000300093	9606.ENSP00000259021	0	0	0	0	0	0.576	0	0.92	0.964
SDC4	SDC3	1855743	1852820	9606.ENSP00000361818	9606.ENSP00000344468	0	0	0	0.747	0	0.566	0.9	0.842	0.964
RBBP7	HIST3H3	1857150	1854433	9606.ENSP00000369424	9606.ENSP00000355657	0	0	0	0	0	0.94	0	0.425	0.964
EP400	TP53	1857832	1846083	9606.ENSP00000374212	9606.ENSP00000269305	0	0	0	0	0	0.576	0.9	0.228	0.964
HNRNPR	YBX1	1856150	1855704	9606.ENSP00000363745	9606.ENSP00000361626	0	0	0	0	0	0.516	0.9	0.316	0.964
CCNE1	RBL2	1845190	1845071	9606.ENSP00000262643	9606.ENSP00000262133	0	0	0	0	0	0.835	0	0.795	0.964
HNRNPR	SF3B3	1856150	1848773	9606.ENSP00000363745	9606.ENSP00000305790	0	0	0	0	0	0.614	0.9	0.143	0.964
MYC	SMARCB1	1856789	1845291	9606.ENSP00000367207	9606.ENSP00000263121	0	0	0	0	0	0.721	0	0.877	0.964
TAF2	KAT2A	1856824	1843061	9606.ENSP00000367406	9606.ENSP00000225916	0	0	0	0	0	0.299	0.9	0.54	0.964
HIST1H2BI	H2AFZ	1856742	1847723	9606.ENSP00000366962	9606.ENSP00000296417	0	0	0	0	0	0.318	0.8	0.752	0.963
GTF3C4	TBP	1855629	1843249	9606.ENSP00000361219	9606.ENSP00000230354	0	0	0	0	0	0.574	0.9	0.215	0.963
TMPO	LMNB1	1845899	1844893	9606.ENSP00000266732	9606.ENSP00000261366	0	0	0	0	0	0.812	0	0.813	0.963
HIST1H2BB	HIST1H2AE	1853610	1848523	9606.ENSP00000350580	9606.ENSP00000303373	0	0	0	0	0	0.251	0.8	0.776	0.963
HNRNPH1	HNRNPU	1853404	1846836	9606.ENSP00000349168	9606.ENSP00000283179	0	0	0	0	0	0.357	0.9	0.472	0.963
CDK1	NCAPD2	1858283	1850703	9606.ENSP00000378699	9606.ENSP00000325017	0	0	0	0	0	0.569	0.9	0.213	0.963
BRCA1	RBL2	1861387	1845071	9606.ENSP00000418960	9606.ENSP00000262133	0	0	0	0	0	0.576	0.9	0.204	0.963
TP53	NFKB1	1846083	1843094	9606.ENSP00000269305	9606.ENSP00000226574	0	0	0	0	0	0	0	0.962	0.963
HIST3H3	HIST1H2AB	1854433	1844723	9606.ENSP00000355657	9606.ENSP00000259791	0	0	0	0	0	0.921	0	0.56	0.963
HIST2H2AC	HIST1H2BO	1851443	1848526	9606.ENSP00000332194	9606.ENSP00000303408	0	0	0	0	0	0.251	0.8	0.778	0.963
DHX9	HNRNPF	1854615	1852109	9606.ENSP00000356520	9606.ENSP00000338477	0	0	0	0	0	0.569	0.9	0.216	0.963
CDK9	SUPT16H	1855868	1842582	9606.ENSP00000362361	9606.ENSP00000216297	0	0	0	0	0	0.447	0.9	0.395	0.963
CDK1	KHDRBS1	1858283	1849655	9606.ENSP00000378699	9606.ENSP00000313829	0	0	0	0	0	0.576	0.9	0.185	0.962
H2AFX	CDK2	1856252	1845906	9606.ENSP00000364310	9606.ENSP00000266970	0	0	0	0	0	0.149	0.9	0.593	0.962
GTF2H2	CCNH	1846383	1844473	9606.ENSP00000274400	9606.ENSP00000256897	0	0	0	0	0	0.343	0.9	0.472	0.962
CDK2	EP300	1845906	1845316	9606.ENSP00000266970	9606.ENSP00000263253	0	0	0	0	0	0.768	0	0.844	0.962
HIST1H2BI	H2AFV	1856742	1849067	9606.ENSP00000366962	9606.ENSP00000308405	0	0	0	0	0	0.318	0.8	0.746	0.962
PPP1CA	GRIN2B	1850792	1846639	9606.ENSP00000326031	9606.ENSP00000279593	0	0	0	0	0	0.066	0.8	0.815	0.962
H2AFV	HIST1H2BD	1849067	1847163	9606.ENSP00000308405	9606.ENSP00000289316	0	0	0	0	0	0.318	0.8	0.75	0.962
MYC	SMARCA2	1856789	1845805	9606.ENSP00000367207	9606.ENSP00000265773	0	0	0	0	0	0.369	0.9	0.45	0.962
HNRNPR	SF3B1	1856150	1851836	9606.ENSP00000363745	9606.ENSP00000335321	0	0	0	0	0	0.612	0.9	0.115	0.962
SDC4	SDC2	1855743	1848909	9606.ENSP00000361818	9606.ENSP00000307046	0	0	0	0.783	0	0.566	0.9	0.827	0.962
CDK1	PSMA6	1858283	1844920	9606.ENSP00000378699	9606.ENSP00000261479	0	0	0	0	0	0.572	0.9	0.192	0.962
POU2F1	PRKDC	1854675	1849621	9606.ENSP00000356840	9606.ENSP00000313420	0	0	0	0	0	0.812	0	0.81	0.962
RELA	RELB	1858923	1842834	9606.ENSP00000384273	9606.ENSP00000221452	0	0	0	0.862	0	0.956	0	0.984	0.962
NUP88	NUP98	1863294	1849839	9606.ENSP00000458954	9606.ENSP00000316032	0	0	0	0	0	0.812	0	0.805	0.961
PBRM1	SMARCB1	1858233	1845291	9606.ENSP00000378307	9606.ENSP00000263121	0	0	0	0	0	0.892	0	0.654	0.961
GNB2L1	PABPC1	1861691	1849591	9606.ENSP00000426909	9606.ENSP00000313007	0	0	0	0	0	0.576	0	0.913	0.961
CREB1	EGR1	1859295	1843543	9606.ENSP00000387699	9606.ENSP00000239938	0	0	0	0	0	0	0	0.961	0.961
COBRA1	POLR2A	1852223	1849743	9606.ENSP00000339495	9606.ENSP00000314949	0	0	0	0	0	0.576	0.9	0.172	0.961
PRPF8	HNRNPU	1848629	1846836	9606.ENSP00000304350	9606.ENSP00000283179	0	0	0	0	0	0.622	0.9	0.074	0.961
CCNT2	CCNH	1845488	1844473	9606.ENSP00000264157	9606.ENSP00000256897	0	0	0	0	0	0	0.9	0.633	0.961
HNRNPR	SNRNP200	1856150	1849929	9606.ENSP00000363745	9606.ENSP00000317123	0	0	0	0	0	0.597	0.9	0.127	0.961
SAP18	RBBP4	1857541	1855919	9606.ENSP00000371973	9606.ENSP00000362592	0	0	0	0	0	0	0.9	0.634	0.961
RUVBL2	TAF1	1864926	1846471	9606.ENSP00000473172	9606.ENSP00000276072	0	0	0	0	0	0.579	0.9	0.148	0.961
HIST1H2BH	H2AFZ	1853333	1847723	9606.ENSP00000348706	9606.ENSP00000296417	0	0	0	0	0	0.318	0.8	0.74	0.961
PPP1CC	PPP1CA	1851808	1850792	9606.ENSP00000335084	9606.ENSP00000326031	0	0	0	0.988	0	0.615	0.9	0.658	0.96
KAT2B	TAF4	1845408	1844180	9606.ENSP00000263754	9606.ENSP00000252996	0	0	0	0	0	0.106	0.9	0.595	0.96
ARID2	SMARCB1	1851800	1845291	9606.ENSP00000335044	9606.ENSP00000263121	0	0	0	0	0	0.846	0	0.753	0.96
NR2F1	THRA	1850774	1845577	9606.ENSP00000325819	9606.ENSP00000264637	0	0	0	0.7	0	0.564	0.9	0.455	0.96
JUN	IRF1	1855436	1843757	9606.ENSP00000360266	9606.ENSP00000245414	0	0	0	0	0	0	0.9	0.623	0.96
RUNX1	EP300	1848173	1845316	9606.ENSP00000300305	9606.ENSP00000263253	0	0	0	0	0	0.809	0	0.8	0.96
HDAC1	KAT2A	1855935	1843061	9606.ENSP00000362649	9606.ENSP00000225916	0	0	0	0	0	0.566	0	0.913	0.96
SMC3	PLK1	1854200	1848135	9606.ENSP00000354720	9606.ENSP00000300093	0	0	0	0	0	0.431	0.9	0.363	0.96
HIST1H2BI	HIST2H2AC	1856742	1851443	9606.ENSP00000366962	9606.ENSP00000332194	0	0	0	0	0	0.251	0.8	0.758	0.96
POLR2B	ERCC3	1849572	1846961	9606.ENSP00000312735	9606.ENSP00000285398	0	0	0	0	0	0	0.9	0.619	0.96
ERCC2	TBP	1857962	1843249	9606.ENSP00000375809	9606.ENSP00000230354	0	0	0	0	0	0	0.9	0.622	0.96
HIST3H2BB	H2AFV	1857956	1849067	9606.ENSP00000375736	9606.ENSP00000308405	0	0	0	0	0	0.318	0.8	0.732	0.96
HDAC1	BCL11B	1855935	1853487	9606.ENSP00000362649	9606.ENSP00000349723	0	0	0	0	0	0.931	0	0.439	0.96
CDK2	MNAT1	1845906	1844871	9606.ENSP00000266970	9606.ENSP00000261245	0	0	0	0	0	0.457	0.9	0.332	0.96
RDBP	CDK9	1856295	1855868	9606.ENSP00000364578	9606.ENSP00000362361	0	0	0	0	0	0	0.9	0.617	0.96
SAP30	MTA2	1847743	1846587	9606.ENSP00000296504	9606.ENSP00000278823	0	0	0	0	0	0.491	0.9	0.288	0.96
ETS1	EP300	1858032	1845316	9606.ENSP00000376436	9606.ENSP00000263253	0	0	0	0	0	0.915	0	0.556	0.96
WHSC2	POLR2A	1857584	1849743	9606.ENSP00000372335	9606.ENSP00000314949	0	0	0	0	0	0.573	0.9	0.148	0.96
SNRNP200	HNRNPU	1849929	1846836	9606.ENSP00000317123	9606.ENSP00000283179	0	0	0	0	0	0.618	0.9	0.058	0.96
HIST1H2BL	H2AFZ	1856676	1847723	9606.ENSP00000366618	9606.ENSP00000296417	0	0	0	0	0	0.318	0.8	0.726	0.959
HNRNPK	SF3B1	1856467	1851836	9606.ENSP00000365439	9606.ENSP00000335321	0	0	0	0	0	0.587	0.9	0.091	0.959
H2AFZ	HIST1H2BD	1847723	1847163	9606.ENSP00000296417	9606.ENSP00000289316	0	0	0	0	0	0.318	0.8	0.726	0.959
HIST1H2BH	H2AFV	1853333	1849067	9606.ENSP00000348706	9606.ENSP00000308405	0	0	0	0	0	0.318	0.8	0.729	0.959
H2AFV	HIST1H2BO	1849067	1848526	9606.ENSP00000308405	9606.ENSP00000303408	0	0	0	0	0	0.318	0.8	0.726	0.959
YBX1	SF3B3	1855704	1848773	9606.ENSP00000361626	9606.ENSP00000305790	0	0	0	0	0	0.568	0.9	0.141	0.959
HIST1H2BK	H2AFZ	1853439	1847723	9606.ENSP00000349430	9606.ENSP00000296417	0	0	0	0	0	0.318	0.8	0.727	0.959
HIST1H2BL	H2AFV	1856676	1849067	9606.ENSP00000366618	9606.ENSP00000308405	0	0	0	0	0	0.318	0.8	0.726	0.959
HIST1H2BN	H2AFZ	1858441	1847723	9606.ENSP00000380177	9606.ENSP00000296417	0	0	0	0	0	0.318	0.8	0.726	0.959
POLR2A	TAF1	1849743	1846471	9606.ENSP00000314949	9606.ENSP00000276072	0	0	0	0	0	0.353	0.9	0.418	0.959
HDAC2	JUN	1861837	1855436	9606.ENSP00000430432	9606.ENSP00000360266	0	0	0	0	0	0.574	0	0.907	0.959
SF3B1	SNW1	1851836	1844933	9606.ENSP00000335321	9606.ENSP00000261531	0	0	0	0	0	0.956	0	0.112	0.959
H2AFZ	SUPT16H	1847723	1842582	9606.ENSP00000296417	9606.ENSP00000216297	0	0	0	0	0	0.83	0	0.77	0.959
SMARCC2	KAT2B	1845915	1845408	9606.ENSP00000267064	9606.ENSP00000263754	0	0	0	0	0	0.303	0.9	0.462	0.959
RUVBL1	TAF1	1850035	1846471	9606.ENSP00000318297	9606.ENSP00000276072	0	0	0	0	0	0.579	0.9	0.117	0.959
HIST1H2BN	H2AFV	1858441	1849067	9606.ENSP00000380177	9606.ENSP00000308405	0	0	0	0	0	0.318	0.8	0.726	0.959
SIN3A	CREBBP	1854005	1845124	9606.ENSP00000353622	9606.ENSP00000262367	0	0	0	0	0	0.15	0.9	0.563	0.959
HIST1H2BK	H2AFV	1853439	1849067	9606.ENSP00000349430	9606.ENSP00000308405	0	0	0	0	0	0.318	0.8	0.726	0.959
H2AFV	HIST1H2BA	1849067	1846410	9606.ENSP00000308405	9606.ENSP00000274764	0	0	0	0	0	0.318	0.8	0.726	0.959
HIST1H2BB	H2AFV	1853610	1849067	9606.ENSP00000350580	9606.ENSP00000308405	0	0	0	0	0	0.318	0.8	0.729	0.959
HIST1H4A	KAT7	1853925	1844658	9606.ENSP00000352980	9606.ENSP00000259021	0	0	0	0	0	0.938	0	0.375	0.959
JUN	NFKBIA	1855436	1842621	9606.ENSP00000360266	9606.ENSP00000216797	0	0	0	0	0	0	0.9	0.607	0.959
ETS1	CREBBP	1858032	1845124	9606.ENSP00000376436	9606.ENSP00000262367	0	0	0	0	0	0.917	0	0.525	0.958
RUVBL1	NOP58	1850035	1845519	9606.ENSP00000318297	9606.ENSP00000264279	0	0	0	0	0	0.853	0	0.725	0.958
CCNB2	CDK7	1847117	1844436	9606.ENSP00000288207	9606.ENSP00000256443	0	0	0	0	0	0.1	0.9	0.58	0.958
RBBP4	KAT2B	1855919	1845408	9606.ENSP00000362592	9606.ENSP00000263754	0	0	0	0	0	0.094	0.9	0.577	0.958
SMARCA4	IKZF1	1853627	1851367	9606.ENSP00000350720	9606.ENSP00000331614	0	0	0	0	0	0.655	0	0.883	0.958
CLOCK	BHLHE40	1849105	1844442	9606.ENSP00000308741	9606.ENSP00000256495	0	0	0	0	0	0.11	0.9	0.573	0.958
PLK1	PSMA6	1848135	1844920	9606.ENSP00000300093	9606.ENSP00000261479	0	0	0	0	0	0.574	0.9	0.105	0.958
CTDP1	CCNT1	1848076	1845024	9606.ENSP00000299543	9606.ENSP00000261900	0	0	0	0	0	0	0.9	0.605	0.958
HDAC2	RUNX1	1861837	1848173	9606.ENSP00000430432	9606.ENSP00000300305	0	0	0	0	0	0.723	0.8	0.308	0.958
SP1	NFKB1	1851138	1843094	9606.ENSP00000329357	9606.ENSP00000226574	0	0	0	0	0	0.916	0	0.506	0.957
NOP56	NOP58	1857348	1845519	9606.ENSP00000370589	9606.ENSP00000264279	0	0	0	0.878	0	0.952	0	0.923	0.957
LMNB2	LMNA	1863725	1854773	9606.ENSP00000462730	9606.ENSP00000357283	0	0	0	0.947	0	0.576	0.9	0.668	0.957
GTF2B	SUB1	1855275	1845682	9606.ENSP00000359531	9606.ENSP00000265073	0	0	0	0	0	0.874	0	0.678	0.957
CREBBP	NFKB1	1845124	1843094	9606.ENSP00000262367	9606.ENSP00000226574	0	0	0	0	0	0	0.9	0.596	0.957
H2AFZ	SIRT1	1847723	1842473	9606.ENSP00000296417	9606.ENSP00000212015	0	0	0	0	0	0.091	0	0.954	0.957
TP53	CDK7	1846083	1844436	9606.ENSP00000269305	9606.ENSP00000256443	0	0	0	0	0	0	0	0.957	0.957
HIST1H2BJ	HIST1H2AA	1852636	1847815	9606.ENSP00000342886	9606.ENSP00000297012	0	0	0	0	0	0.301	0.8	0.723	0.957
H2AFV	SUPT16H	1849067	1842582	9606.ENSP00000308405	9606.ENSP00000216297	0	0	0	0	0	0.83	0	0.758	0.957
HIST1H2BB	SSRP1	1853610	1846565	9606.ENSP00000350580	9606.ENSP00000278412	0	0	0	0	0	0.934	0	0.381	0.957
XPO1	CCNB1	1858987	1844435	9606.ENSP00000384863	9606.ENSP00000256442	0	0	0	0	0	0.163	0.9	0.528	0.957
NCL	NSUN2	1850027	1845592	9606.ENSP00000318195	9606.ENSP00000264670	0	0	0	0	0	0.576	0.9	0.081	0.957
CCNB2	CCNB1	1847117	1844435	9606.ENSP00000288207	9606.ENSP00000256442	0	0	0	0.953	0	0.576	0.9	0.813	0.957
HNRNPR	POLR2A	1856150	1849743	9606.ENSP00000363745	9606.ENSP00000314949	0	0	0	0	0	0.538	0.9	0.162	0.957
SAP18	SMARCA5	1857541	1846833	9606.ENSP00000371973	9606.ENSP00000283131	0	0	0	0	0	0.56	0.9	0.121	0.957
HDAC1	H2AFZ	1855935	1847723	9606.ENSP00000362649	9606.ENSP00000296417	0	0	0	0	0	0.426	0.8	0.663	0.957
SETD7	SIRT1	1846356	1842473	9606.ENSP00000274031	9606.ENSP00000212015	0	0	0	0	0	0.605	0	0.896	0.957
HIST1H2AM	HIST1H2BJ	1853877	1852636	9606.ENSP00000352627	9606.ENSP00000342886	0	0	0	0	0	0.251	0.8	0.736	0.957
GTF2B	TAF4B	1855275	1846067	9606.ENSP00000359531	9606.ENSP00000269142	0	0	0	0	0	0	0.9	0.591	0.957
TAF7	KAT2A	1849570	1843061	9606.ENSP00000312709	9606.ENSP00000225916	0	0	0	0	0	0.374	0.9	0.37	0.957
RDBP	CCNT1	1856295	1845024	9606.ENSP00000364578	9606.ENSP00000261900	0	0	0	0	0	0	0.9	0.58	0.956
HIST1H2BI	HIST1H2AE	1856742	1848523	9606.ENSP00000366962	9606.ENSP00000303373	0	0	0	0	0	0.251	0.8	0.733	0.956
HDAC1	HIST1H4A	1855935	1853925	9606.ENSP00000362649	9606.ENSP00000352980	0	0	0	0	0	0.933	0	0.38	0.956
KPNB1	IPO5	1847208	1844939	9606.ENSP00000290158	9606.ENSP00000261574	0	0	0	0.61	0	0.935	0	0.821	0.956
HIST3H2BB	HDAC1	1857956	1855935	9606.ENSP00000375736	9606.ENSP00000362649	0	0	0	0	0	0.684	0.8	0.37	0.956
NUP88	NUP93	1863294	1849329	9606.ENSP00000458954	9606.ENSP00000310668	0	0	0	0	0	0	0.9	0.586	0.956
HIST3H2BB	HIST1H2AA	1857956	1847815	9606.ENSP00000375736	9606.ENSP00000297012	0	0	0	0	0	0.251	0.8	0.733	0.956
HDAC2	BCL11B	1861837	1853487	9606.ENSP00000430432	9606.ENSP00000349723	0	0	0	0	0	0.931	0	0.389	0.956
PSMB10	PSMB7	1853696	1844696	9606.ENSP00000351314	9606.ENSP00000259457	0	0	0	0.969	0	0.57	0.9	0.771	0.956
ALYREF	ACIN1	1861534	1845198	9606.ENSP00000421592	9606.ENSP00000262710	0	0	0	0	0	0.95	0	0.159	0.956
HIST1H2AC	HIST1H2BD	1850346	1847163	9606.ENSP00000321389	9606.ENSP00000289316	0	0	0	0	0	0.251	0.8	0.734	0.956
HDAC2	H2AFZ	1861837	1847723	9606.ENSP00000430432	9606.ENSP00000296417	0	0	0	0	0	0.426	0.8	0.652	0.956
JUN	HMGB1	1855436	1852653	9606.ENSP00000360266	9606.ENSP00000343040	0	0	0	0	0	0.238	0.9	0.471	0.956
GNL3	FBL	1859893	1842861	9606.ENSP00000395772	9606.ENSP00000221801	0	0	0	0	0	0.914	0	0.509	0.956
PLK1	PSMB6	1848135	1846162	9606.ENSP00000300093	9606.ENSP00000270586	0	0	0	0	0	0.574	0.9	0.066	0.956
BRCA1	SMARCA4	1861387	1853627	9606.ENSP00000418960	9606.ENSP00000350720	0	0	0	0	0	0.915	0	0.507	0.956
HIST1H2BI	HIST1H2AM	1856742	1853877	9606.ENSP00000366962	9606.ENSP00000352627	0	0	0	0	0	0.251	0.8	0.734	0.956
PPP1CC	EIF2AK2	1851808	1843335	9606.ENSP00000335084	9606.ENSP00000233057	0	0	0	0	0	0.761	0.8	0.153	0.956
PLK1	PSMA4	1848135	1842214	9606.ENSP00000300093	9606.ENSP00000044462	0	0	0	0	0	0.574	0.9	0.053	0.956
POLR2B	CCNH	1849572	1844473	9606.ENSP00000312735	9606.ENSP00000256897	0	0	0	0	0	0.564	0.9	0.056	0.955
RELA	POLR2A	1858923	1849743	9606.ENSP00000384273	9606.ENSP00000314949	0	0	0	0	0	0.576	0.9	0.041	0.955
PSMB5	PLK1	1854354	1848135	9606.ENSP00000355325	9606.ENSP00000300093	0	0	0	0	0	0.574	0.9	0	0.955
PLK1	PSMB7	1848135	1844696	9606.ENSP00000300093	9606.ENSP00000259457	0	0	0	0	0	0.574	0.9	0	0.955
CXCR4	SDC4	1859216	1855743	9606.ENSP00000386884	9606.ENSP00000361818	0	0	0	0	0	0.576	0.9	0	0.955
HDAC1	HIST2H2AC	1855935	1851443	9606.ENSP00000362649	9606.ENSP00000332194	0	0	0	0	0	0.17	0.8	0.754	0.955
HNRNPF	POLR2A	1852109	1849743	9606.ENSP00000338477	9606.ENSP00000314949	0	0	0	0	0	0.576	0.9	0	0.955
PDS5A	PLK1	1848529	1848135	9606.ENSP00000303427	9606.ENSP00000300093	0	0	0	0	0	0.093	0.9	0.546	0.955
SAP130	TAF4	1853576	1844180	9606.ENSP00000350333	9606.ENSP00000252996	0	0	0	0	0	0.571	0.9	0	0.955
RBBP7	KAT2B	1857150	1845408	9606.ENSP00000369424	9606.ENSP00000263754	0	0	0	0	0	0.094	0.9	0.551	0.955
SIN3A	SAP130	1854005	1853576	9606.ENSP00000353622	9606.ENSP00000350333	0	0	0	0	0	0.574	0.9	0	0.955
NOP2	DDX24	1858730	1851065	9606.ENSP00000382392	9606.ENSP00000328690	0	0	0	0	0	0.881	0	0.645	0.955
PLK1	PSMB3	1848135	1843022	9606.ENSP00000300093	9606.ENSP00000225426	0	0	0	0	0	0.574	0.9	0	0.955
PLK1	PSMB1	1848135	1845087	9606.ENSP00000300093	9606.ENSP00000262193	0	0	0	0	0	0.574	0.9	0	0.955
GTF2B	CCNH	1855275	1844473	9606.ENSP00000359531	9606.ENSP00000256897	0	0	0	0	0	0	0.9	0.573	0.955
PSMA7	PLK1	1855365	1848135	9606.ENSP00000359910	9606.ENSP00000300093	0	0	0	0	0	0.574	0.9	0	0.955
PSMB2	PLK1	1855861	1848135	9606.ENSP00000362334	9606.ENSP00000300093	0	0	0	0	0	0.574	0.9	0	0.955
HIST1H2BM	HIST1H2AE	1853848	1848523	9606.ENSP00000352442	9606.ENSP00000303373	0	0	0	0	0	0.251	0.8	0.727	0.955
HDAC2	KAT2A	1861837	1843061	9606.ENSP00000430432	9606.ENSP00000225916	0	0	0	0	0	0.566	0	0.901	0.955
CDK2	SMARCA2	1845906	1845805	9606.ENSP00000266970	9606.ENSP00000265773	0	0	0	0	0	0.33	0.9	0.392	0.955
PBRM1	ARID2	1858233	1851800	9606.ENSP00000378307	9606.ENSP00000335044	0	0	0	0	0	0.647	0	0.877	0.954
TP53	SMARCB1	1846083	1845291	9606.ENSP00000269305	9606.ENSP00000263121	0	0	0	0	0	0.576	0	0.896	0.954
MLL	TAF9	1862045	1842675	9606.ENSP00000436786	9606.ENSP00000217893	0	0	0	0	0	0.567	0.9	0	0.954
HIST1H2BM	HIST1H2AJ	1853848	1851044	9606.ENSP00000352442	9606.ENSP00000328484	0	0	0	0	0	0.301	0.8	0.702	0.954
HIST1H2AE	HIST1H2BD	1848523	1847163	9606.ENSP00000303373	9606.ENSP00000289316	0	0	0	0	0	0.251	0.8	0.718	0.954
POLR2A	CREBBP	1849743	1845124	9606.ENSP00000314949	9606.ENSP00000262367	0	0	0	0	0	0.52	0.9	0.135	0.954
H2AFX	HIST1H4A	1856252	1853925	9606.ENSP00000364310	9606.ENSP00000352980	0	0	0	0	0	0.885	0	0.617	0.954
XRCC5	POLM	1857983	1843616	9606.ENSP00000375977	9606.ENSP00000242248	0	0	0	0	0	0	0.9	0.549	0.953
SSRP1	CSNK2A2	1846565	1845161	9606.ENSP00000278412	9606.ENSP00000262506	0	0	0	0	0	0.626	0	0.879	0.953
TCERG1	HTATSF1	1847779	1842704	9606.ENSP00000296702	9606.ENSP00000218364	0	0	0	0	0	0	0	0.953	0.953
CHD4	SAP30	1853454	1847743	9606.ENSP00000349508	9606.ENSP00000296504	0	0	0	0	0	0.556	0.9	0	0.953
SARNP	THOC1	1852022	1844947	9606.ENSP00000337632	9606.ENSP00000261600	0	0	0	0	0	0	0.9	0.549	0.953
WDR5	TAF7	1853715	1849570	9606.ENSP00000351446	9606.ENSP00000312709	0	0	0	0	0	0.469	0.9	0.186	0.953
YBX1	HNRNPL	1855704	1842831	9606.ENSP00000361626	9606.ENSP00000221419	0	0	0	0	0	0.34	0.9	0.358	0.953
SMARCA4	HMGB1	1853627	1852653	9606.ENSP00000350720	9606.ENSP00000343040	0	0	0	0	0	0.31	0.9	0.361	0.952
HIST1H2AM	HIST1H2BB	1853877	1853610	9606.ENSP00000352627	9606.ENSP00000350580	0	0	0	0	0	0.251	0.8	0.707	0.952
RBM17	SF3B1	1857112	1851836	9606.ENSP00000369218	9606.ENSP00000335321	0	0	0	0	0	0.897	0	0.561	0.952
HIST1H4A	HIST2H2AC	1853925	1851443	9606.ENSP00000352980	9606.ENSP00000332194	0	0	0	0	0	0.844	0	0.706	0.952
HIST2H2AC	HIST1H2BD	1851443	1847163	9606.ENSP00000332194	9606.ENSP00000289316	0	0	0	0	0	0.251	0.8	0.708	0.952
SMC4	CCNB1	1852454	1844435	9606.ENSP00000341382	9606.ENSP00000256442	0	0	0	0	0	0	0.9	0.539	0.952
HDAC2	H2AFY2	1861837	1855864	9606.ENSP00000430432	9606.ENSP00000362352	0	0	0	0	0	0.624	0.8	0.412	0.952
ILF3	DHX9	1860459	1854615	9606.ENSP00000404121	9606.ENSP00000356520	0	0	0	0	0	0.749	0	0.818	0.952
EP400	H2AFZ	1857832	1847723	9606.ENSP00000374212	9606.ENSP00000296417	0	0	0	0	0	0.842	0	0.712	0.952
TAF4	KAT2A	1844180	1843061	9606.ENSP00000252996	9606.ENSP00000225916	0	0	0	0	0	0.106	0.9	0.513	0.952
HDAC1	RANBP2	1855935	1846837	9606.ENSP00000362649	9606.ENSP00000283195	0	0	0	0	0	0.3	0.9	0.375	0.952
CDK1	TUBA4A	1858283	1843912	9606.ENSP00000378699	9606.ENSP00000248437	0	0	0	0	0	0.092	0.9	0.516	0.952
HDAC2	IKZF1	1861837	1851367	9606.ENSP00000430432	9606.ENSP00000331614	0	0	0	0	0	0.909	0	0.492	0.952
CREBBP	EGR1	1845124	1843543	9606.ENSP00000262367	9606.ENSP00000239938	0	0	0	0	0	0.603	0	0.885	0.952
BRCA1	MLH1	1861387	1843304	9606.ENSP00000418960	9606.ENSP00000231790	0	0	0	0	0	0.751	0	0.812	0.951
TAF1	SMARCA2	1846471	1845805	9606.ENSP00000276072	9606.ENSP00000265773	0	0	0	0	0	0.857	0	0.671	0.951
POLR2A	TCERG1	1849743	1847779	9606.ENSP00000314949	9606.ENSP00000296702	0	0	0	0	0	0.915	0	0.453	0.951
HIST1H2AD	HIST1H2BO	1852412	1848526	9606.ENSP00000341094	9606.ENSP00000303408	0	0	0	0	0	0.251	0.8	0.703	0.951
HNRNPR	HNRNPU	1856150	1846836	9606.ENSP00000363745	9606.ENSP00000283179	0	0	0	0	0	0	0.9	0.533	0.951
TBP	KAT2A	1843249	1843061	9606.ENSP00000230354	9606.ENSP00000225916	0	0	0	0	0	0.667	0	0.859	0.951
CREB1	HDAC1	1859295	1855935	9606.ENSP00000387699	9606.ENSP00000362649	0	0	0	0	0	0.812	0	0.751	0.951
HIST1H2BK	HIST1H2AA	1853439	1847815	9606.ENSP00000349430	9606.ENSP00000297012	0	0	0	0	0	0.251	0.8	0.701	0.951
ITGAV	THBS1	1844842	1844779	9606.ENSP00000261023	9606.ENSP00000260356	0	0	0	0	0	0.576	0.8	0.475	0.951
CCNE1	CCNH	1845190	1844473	9606.ENSP00000262643	9606.ENSP00000256897	0	0	0	0	0	0	0.9	0.53	0.951
SMARCA2	KAT7	1845805	1844658	9606.ENSP00000265773	9606.ENSP00000259021	0	0	0	0	0	0.437	0	0.916	0.951
CCNT1	MNAT1	1845024	1844871	9606.ENSP00000261900	9606.ENSP00000261245	0	0	0	0	0	0.458	0.9	0.171	0.951
MYC	SIRT1	1856789	1842473	9606.ENSP00000367207	9606.ENSP00000212015	0	0	0	0	0	0.576	0	0.889	0.951
GTF2B	SMARCC2	1855275	1845915	9606.ENSP00000359531	9606.ENSP00000267064	0	0	0	0	0	0	0.9	0.534	0.951
GTF2B	SMARCB1	1855275	1845291	9606.ENSP00000359531	9606.ENSP00000263121	0	0	0	0	0	0	0.9	0.522	0.95
CDK1	TUBA1A	1858283	1848244	9606.ENSP00000378699	9606.ENSP00000301071	0	0	0	0	0	0.092	0.9	0.499	0.95
TP53	CCNH	1846083	1844473	9606.ENSP00000269305	9606.ENSP00000256897	0	0	0	0	0	0.576	0	0.887	0.95
SP1	CDK2	1851138	1845906	9606.ENSP00000329357	9606.ENSP00000266970	0	0	0	0	0	0.601	0	0.879	0.95
CHD8	RUVBL1	1858781	1850035	9606.ENSP00000382863	9606.ENSP00000318297	0	0	0	0	0	0.155	0.9	0.457	0.95
RAN	NUP93	1857999	1849329	9606.ENSP00000376176	9606.ENSP00000310668	0	0	0	0	0	0	0.9	0.527	0.95
SIN3A	RUNX1	1854005	1848173	9606.ENSP00000353622	9606.ENSP00000300305	0	0	0	0	0	0.598	0	0.88	0.95
CDK1	TUBB4A	1858283	1845475	9606.ENSP00000378699	9606.ENSP00000264071	0	0	0	0	0	0.092	0.9	0.493	0.95
HIST1H2AM	HIST1H2BK	1853877	1853439	9606.ENSP00000352627	9606.ENSP00000349430	0	0	0	0	0	0.251	0.8	0.695	0.95
CREB1	GRB2	1859295	1852164	9606.ENSP00000387699	9606.ENSP00000339007	0	0	0	0	0	0	0.9	0.524	0.95
RBBP4	HIST1H3J	1855919	1853820	9606.ENSP00000362592	9606.ENSP00000352252	0	0	0	0	0	0.899	0	0.52	0.949
CDK1	SIRT1	1858283	1842473	9606.ENSP00000378699	9606.ENSP00000212015	0	0	0	0	0	0.615	0	0.873	0.949
TAF6L	TAF1	1847468	1846471	9606.ENSP00000294168	9606.ENSP00000276072	0	0	0	0	0	0.89	0	0.558	0.949
MAX	DDX18	1853721	1845312	9606.ENSP00000351490	9606.ENSP00000263239	0	0	0	0	0	0	0.9	0.512	0.949
GTF2H1	TBP	1845828	1843249	9606.ENSP00000265963	9606.ENSP00000230354	0	0	0	0	0	0	0.9	0.518	0.949
CHD4	TBP	1853454	1843249	9606.ENSP00000349508	9606.ENSP00000230354	0	0	0	0	0	0.247	0.9	0.379	0.949
CDC5L	PPP1R8	1855491	1849448	9606.ENSP00000360532	9606.ENSP00000311677	0	0	0	0	0	0.564	0	0.889	0.949
WHSC2	CDK9	1857584	1855868	9606.ENSP00000372335	9606.ENSP00000362361	0	0	0	0	0	0	0.9	0.513	0.949
XPO1	CDK1	1858987	1858283	9606.ENSP00000384863	9606.ENSP00000378699	0	0	0	0	0	0	0.9	0.517	0.949
TAF3	TAF9	1852303	1842675	9606.ENSP00000340271	9606.ENSP00000217893	0	0	0	0	0	0	0.9	0.513	0.949
HMGB1	SUPT16H	1852653	1842582	9606.ENSP00000343040	9606.ENSP00000216297	0	0	0	0	0	0.629	0	0.87	0.949
CDK1	TUBB4B	1858283	1852441	9606.ENSP00000378699	9606.ENSP00000341289	0	0	0	0	0	0.092	0.9	0.492	0.949
RUVBL1	PRKDC	1850035	1849621	9606.ENSP00000318297	9606.ENSP00000313420	0	0	0	0	0	0.931	0	0.288	0.949
HIST1H2BJ	HIST1H2AC	1852636	1850346	9606.ENSP00000342886	9606.ENSP00000321389	0	0	0	0	0	0.301	0.8	0.66	0.948
HIST1H2BN	HIST1H2AA	1858441	1847815	9606.ENSP00000380177	9606.ENSP00000297012	0	0	0	0	0	0.251	0.8	0.682	0.948
H2AFX	MLH1	1856252	1843304	9606.ENSP00000364310	9606.ENSP00000231790	0	0	0	0	0	0.043	0.9	0.508	0.948
GTF2I	TBP	1850459	1843249	9606.ENSP00000322542	9606.ENSP00000230354	0	0	0	0	0	0	0	0.948	0.948
SUZ12	CBX4	1849881	1846093	9606.ENSP00000316578	9606.ENSP00000269397	0	0	0	0	0	0	0.9	0.508	0.948
NAP1L4	EIF3E	1857242	1842805	9606.ENSP00000369915	9606.ENSP00000220849	0	0	0	0	0	0.949	0	0	0.948
HIST1H2BI	HIST1H2AD	1856742	1852412	9606.ENSP00000366962	9606.ENSP00000341094	0	0	0	0	0	0.251	0.8	0.683	0.948
RAN	NUP85	1857999	1843765	9606.ENSP00000376176	9606.ENSP00000245544	0	0	0	0	0	0.246	0.9	0.373	0.948
EP300	TBP	1845316	1843249	9606.ENSP00000263253	9606.ENSP00000230354	0	0	0	0	0	0.69	0	0.84	0.948
GTF2B	HMGB1	1855275	1852653	9606.ENSP00000359531	9606.ENSP00000343040	0	0	0	0	0	0.235	0.9	0.376	0.948
CCNT2	MNAT1	1845488	1844871	9606.ENSP00000264157	9606.ENSP00000261245	0	0	0	0	0	0.458	0.9	0.117	0.948
HNRNPM	HNRNPD	1850730	1849608	9606.ENSP00000325376	9606.ENSP00000313199	0	0	0	0	0	0	0.9	0.506	0.948
DDX3X	PABPC1	1858776	1849591	9606.ENSP00000382840	9606.ENSP00000313007	0	0	0	0	0	0.899	0	0.514	0.948
CREB1	MEIS1	1859295	1846251	9606.ENSP00000387699	9606.ENSP00000272369	0	0	0	0	0	0.668	0	0.847	0.947
RUVBL1	TAF9	1850035	1842675	9606.ENSP00000318297	9606.ENSP00000217893	0	0	0	0	0	0.495	0.9	0	0.947
RUVBL2	TAF9	1864926	1842675	9606.ENSP00000473172	9606.ENSP00000217893	0	0	0	0	0	0.495	0.9	0.043	0.947
TUBB4B	PLK1	1852441	1848135	9606.ENSP00000341289	9606.ENSP00000300093	0	0	0	0	0	0.238	0.9	0.366	0.947
PCBP1	HNRNPL	1848744	1842831	9606.ENSP00000305556	9606.ENSP00000221419	0	0	0	0	0	0	0.9	0.5	0.947
PDS5B	PDS5A	1849657	1848529	9606.ENSP00000313851	9606.ENSP00000303427	0	0	0	0.979	0	0.488	0.9	0.56	0.947
HIST1H2AD	HIST1H2BA	1852412	1846410	9606.ENSP00000341094	9606.ENSP00000274764	0	0	0	0	0	0.251	0.8	0.674	0.947
CREBBP	KAT2A	1845124	1843061	9606.ENSP00000262367	9606.ENSP00000225916	0	0	0	0	0	0.602	0	0.874	0.947
GRIN1	GRIN2C	1855505	1847389	9606.ENSP00000360608	9606.ENSP00000293190	0	0	0	0.7	0	0.294	0.9	0.895	0.946
HDAC1	TRRAP	1855935	1853208	9606.ENSP00000362649	9606.ENSP00000347733	0	0	0	0	0	0.09	0.9	0.462	0.946
JUN	RELB	1855436	1842834	9606.ENSP00000360266	9606.ENSP00000221452	0	0	0	0	0	0	0	0.946	0.946
NUP88	RAN	1863294	1857999	9606.ENSP00000458954	9606.ENSP00000376176	0	0	0	0	0	0	0.9	0.484	0.946
SMARCA4	CCNE1	1853627	1845190	9606.ENSP00000350720	9606.ENSP00000262643	0	0	0	0	0	0.814	0	0.722	0.946
PDS5A	BIRC5	1848529	1848314	9606.ENSP00000303427	9606.ENSP00000301633	0	0	0	0	0	0	0.9	0.483	0.946
PLK1	TUBB4A	1848135	1845475	9606.ENSP00000300093	9606.ENSP00000264071	0	0	0	0	0	0.238	0.9	0.354	0.946
HNRNPU	HNRNPL	1846836	1842831	9606.ENSP00000283179	9606.ENSP00000221419	0	0	0	0	0	0	0.9	0.489	0.946
ARID1A	TP53	1850249	1846083	9606.ENSP00000320485	9606.ENSP00000269305	0	0	0	0	0	0.576	0	0.878	0.946
GTF2H1	CCNT1	1845828	1845024	9606.ENSP00000265963	9606.ENSP00000261900	0	0	0	0	0	0.3	0.9	0.296	0.946
HIST1H2BJ	HIST1H2AE	1852636	1848523	9606.ENSP00000342886	9606.ENSP00000303373	0	0	0	0	0	0.251	0.8	0.673	0.946
MATR3	SFPQ	1854107	1853490	9606.ENSP00000354346	9606.ENSP00000349748	0	0	0	0	0	0	0.9	0.49	0.946
SIRT1	ESRRA	1842473	1842111	9606.ENSP00000212015	9606.ENSP00000000442	0	0	0	0	0	0.576	0	0.877	0.946
SMARCA4	CHD4	1853627	1853454	9606.ENSP00000350720	9606.ENSP00000349508	0	0	0	0.669	0	0.925	0	0.832	0.946
XPO1	HDAC1	1858987	1855935	9606.ENSP00000384863	9606.ENSP00000362649	0	0	0	0	0	0.101	0.9	0.438	0.945
MCM7	PLK1	1848945	1848135	9606.ENSP00000307288	9606.ENSP00000300093	0	0	0	0	0	0.576	0	0.877	0.945
KPNB1	NUP85	1847208	1843765	9606.ENSP00000290158	9606.ENSP00000245544	0	0	0	0	0	0	0.9	0.479	0.945
MYC	GTF2I	1856789	1850459	9606.ENSP00000367207	9606.ENSP00000322542	0	0	0	0	0	0.621	0	0.862	0.945
HIST1H2BH	HIST1H2AJ	1853333	1851044	9606.ENSP00000348706	9606.ENSP00000328484	0	0	0	0	0	0.251	0.8	0.665	0.945
GRB2	MAP2K2	1852164	1845250	9606.ENSP00000339007	9606.ENSP00000262948	0	0	0	0	0	0	0.9	0.48	0.945
HIST1H2BJ	HIST1H2AD	1852636	1852412	9606.ENSP00000342886	9606.ENSP00000341094	0	0	0	0	0	0.301	0.8	0.642	0.945
CCNH	TBP	1844473	1843249	9606.ENSP00000256897	9606.ENSP00000230354	0	0	0	0	0	0	0.9	0.477	0.945
HIST1H2BB	HIST1H2AJ	1853610	1851044	9606.ENSP00000350580	9606.ENSP00000328484	0	0	0	0	0	0.251	0.8	0.665	0.945
IRF1	EGR1	1843757	1843543	9606.ENSP00000245414	9606.ENSP00000239938	0	0	0	0	0	0	0.9	0.48	0.945
HIST1H2AM	HIST1H2BD	1853877	1847163	9606.ENSP00000352627	9606.ENSP00000289316	0	0	0	0	0	0.251	0.8	0.663	0.945
YBX1	APEX1	1855704	1842615	9606.ENSP00000361626	9606.ENSP00000216714	0	0	0	0	0	0.567	0	0.879	0.945
RUVBL2	CHD8	1864926	1858781	9606.ENSP00000473172	9606.ENSP00000382863	0	0	0	0	0	0.155	0.9	0.401	0.945
KLF5	EP300	1856730	1845316	9606.ENSP00000366915	9606.ENSP00000263253	0	0	0	0	0	0.92	0	0.327	0.944
HDAC2	CREB1	1861837	1859295	9606.ENSP00000430432	9606.ENSP00000387699	0	0	0	0	0	0.812	0	0.714	0.944
XPO1	NUP85	1858987	1843765	9606.ENSP00000384863	9606.ENSP00000245544	0	0	0	0	0	0	0.9	0.463	0.944
CREB1	NFKB1	1859295	1843094	9606.ENSP00000387699	9606.ENSP00000226574	0	0	0	0	0	0	0	0.944	0.944
HNRNPD	PRPF8	1849608	1848629	9606.ENSP00000313199	9606.ENSP00000304350	0	0	0	0	0	0.361	0.9	0.195	0.944
RANGAP1	KPNA2	1853317	1851476	9606.ENSP00000348577	9606.ENSP00000332455	0	0	0	0	0	0.09	0.9	0.434	0.944
HNRNPM	HNRNPU	1850730	1846836	9606.ENSP00000325376	9606.ENSP00000283179	0	0	0	0	0	0	0.9	0.472	0.944
CDK1	HDAC1	1858283	1855935	9606.ENSP00000378699	9606.ENSP00000362649	0	0	0	0	0	0.102	0.9	0.429	0.944
HIST1H2BI	HIST1H2AC	1856742	1850346	9606.ENSP00000366962	9606.ENSP00000321389	0	0	0	0	0	0.251	0.8	0.659	0.944
TAF8	TAF4B	1855796	1846067	9606.ENSP00000362068	9606.ENSP00000269142	0	0	0	0	0	0.825	0.36	0.548	0.944
HIST1H4A	HIST1H3J	1853925	1853820	9606.ENSP00000352980	9606.ENSP00000352252	0	0	0	0	0	0.764	0	0.773	0.944
HNRNPF	HNRNPU	1852109	1846836	9606.ENSP00000338477	9606.ENSP00000283179	0	0	0	0	0	0	0.9	0.472	0.944
PLK1	SMC2	1848135	1847012	9606.ENSP00000300093	9606.ENSP00000286398	0	0	0	0	0	0.216	0.9	0.349	0.944
YBX1	EEF1A1	1855704	1851211	9606.ENSP00000361626	9606.ENSP00000330054	0	0	0	0	0	0.585	0	0.871	0.944
APP	GAPDH	1846936	1843185	9606.ENSP00000284981	9606.ENSP00000229239	0	0	0	0	0	0.581	0.8	0.394	0.944
XPO1	DHX9	1858987	1854615	9606.ENSP00000384863	9606.ENSP00000356520	0	0	0	0	0	0.572	0	0.876	0.944
POLR2A	TAF12	1849743	1845448	9606.ENSP00000314949	9606.ENSP00000263974	0	0	0	0	0	0	0.9	0.472	0.944
HIST1H2BN	HIST1H2AD	1858441	1852412	9606.ENSP00000380177	9606.ENSP00000341094	0	0	0	0	0	0.251	0.8	0.659	0.944
PDS5B	PLK1	1849657	1848135	9606.ENSP00000313851	9606.ENSP00000300093	0	0	0	0	0	0.093	0.9	0.438	0.944
HIST3H3	SMC3	1854433	1854200	9606.ENSP00000355657	9606.ENSP00000354720	0	0	0	0	0	0.221	0.9	0.341	0.944
HDAC1	SNW1	1855935	1844933	9606.ENSP00000362649	9606.ENSP00000261531	0	0	0	0	0	0.267	0.9	0.299	0.944
CDC5L	PPP1CA	1855491	1850792	9606.ENSP00000360532	9606.ENSP00000326031	0	0	0	0	0	0.944	0	0.053	0.944
HIST1H2BM	HIST1H2AA	1853848	1847815	9606.ENSP00000352442	9606.ENSP00000297012	0	0	0	0	0	0.301	0.8	0.632	0.944
TAF2	TAF4B	1856824	1846067	9606.ENSP00000367406	9606.ENSP00000269142	0	0	0	0	0	0.824	0.36	0.544	0.944
DHX9	KHDRBS1	1854615	1849655	9606.ENSP00000356520	9606.ENSP00000313829	0	0	0	0	0	0.898	0	0.471	0.944
HIST1H2BL	HIST1H2AD	1856676	1852412	9606.ENSP00000366618	9606.ENSP00000341094	0	0	0	0	0	0.251	0.8	0.654	0.943
HNRNPM	PCBP1	1850730	1848744	9606.ENSP00000325376	9606.ENSP00000305556	0	0	0	0	0	0.221	0.9	0.327	0.943
HIST3H3	SETD7	1854433	1846356	9606.ENSP00000355657	9606.ENSP00000274031	0	0	0	0	0	0.93	0	0.222	0.943
HIST1H2BH	HIST1H2AE	1853333	1848523	9606.ENSP00000348706	9606.ENSP00000303373	0	0	0	0	0	0.251	0.8	0.651	0.943
NFKB2	NFKBIA	1855147	1842621	9606.ENSP00000358983	9606.ENSP00000216797	0	0	0	0.742	0	0.283	0.9	0.959	0.943
HIST1H2BK	HIST2H2AC	1853439	1851443	9606.ENSP00000349430	9606.ENSP00000332194	0	0	0	0	0	0.251	0.8	0.655	0.943
H2AFJ	HIST1H2BO	1857794	1848526	9606.ENSP00000373730	9606.ENSP00000303408	0	0	0	0	0	0.251	0.8	0.655	0.943
HIST1H2AM	HIST1H2BA	1853877	1846410	9606.ENSP00000352627	9606.ENSP00000274764	0	0	0	0	0	0.251	0.8	0.655	0.943
DHX9	PRKDC	1854615	1849621	9606.ENSP00000356520	9606.ENSP00000313420	0	0	0	0	0	0.566	0	0.874	0.943
GTF2B	NFKB1	1855275	1843094	9606.ENSP00000359531	9606.ENSP00000226574	0	0	0	0	0	0	0	0.943	0.943
HIST1H2BB	HIST2H2AC	1853610	1851443	9606.ENSP00000350580	9606.ENSP00000332194	0	0	0	0	0	0.251	0.8	0.652	0.943
GNL3	NOP58	1859893	1845519	9606.ENSP00000395772	9606.ENSP00000264279	0	0	0	0	0	0.927	0	0.251	0.943
HDAC1	RUVBL1	1855935	1850035	9606.ENSP00000362649	9606.ENSP00000318297	0	0	0	0	0	0.305	0.9	0.256	0.943
HIST1H2BM	HIST1H2AD	1853848	1852412	9606.ENSP00000352442	9606.ENSP00000341094	0	0	0	0	0	0.301	0.8	0.62	0.942
MED14	POLR2A	1850574	1849743	9606.ENSP00000323720	9606.ENSP00000314949	0	0	0	0	0	0.832	0	0.672	0.942
THBS1	SDC1	1844779	1844292	9606.ENSP00000260356	9606.ENSP00000254351	0	0	0	0	0	0	0.9	0.45	0.942
HNRNPF	HNRNPL	1852109	1842831	9606.ENSP00000338477	9606.ENSP00000221419	0	0	0	0	0	0	0.9	0.452	0.942
PLK1	EP300	1848135	1845316	9606.ENSP00000300093	9606.ENSP00000263253	0	0	0	0	0	0.243	0.9	0.303	0.942
TAF13	TAF6L	1854288	1847468	9606.ENSP00000355051	9606.ENSP00000294168	0	0	0	0	0	0.827	0	0.682	0.942
H2AFY	HIST1H2BA	1861595	1846410	9606.ENSP00000423563	9606.ENSP00000274764	0	0	0	0	0	0.251	0.8	0.644	0.942
HIST1H2AC	HIST1H2BO	1850346	1848526	9606.ENSP00000321389	9606.ENSP00000303408	0	0	0	0	0	0.251	0.8	0.645	0.942
TAF10	SETD7	1848061	1846356	9606.ENSP00000299424	9606.ENSP00000274031	0	0	0	0	0	0.805	0	0.714	0.942
RUVBL2	WDR5	1864926	1853715	9606.ENSP00000473172	9606.ENSP00000351446	0	0	0	0	0	0.35	0.9	0.191	0.942
HNRNPD	SF3B3	1849608	1848773	9606.ENSP00000313199	9606.ENSP00000305790	0	0	0	0	0	0.362	0.9	0.171	0.942
MED14	EP300	1850574	1845316	9606.ENSP00000323720	9606.ENSP00000263253	0	0	0	0	0	0.202	0.9	0.332	0.942
HIST1H2BJ	HIST2H2AC	1852636	1851443	9606.ENSP00000342886	9606.ENSP00000332194	0	0	0	0	0	0.251	0.8	0.641	0.941
TAF1	EP300	1846471	1845316	9606.ENSP00000276072	9606.ENSP00000263253	0	0	0	0.608	0	0.216	0.9	0.729	0.941
TAF6	WDR5	1860193	1853715	9606.ENSP00000399982	9606.ENSP00000351446	0	0	0	0	0	0.396	0.9	0.102	0.941
HIST3H2BB	HIST1H2AC	1857956	1850346	9606.ENSP00000375736	9606.ENSP00000321389	0	0	0	0	0	0.251	0.8	0.642	0.941
HIST1H2AM	HIST1H2BM	1853877	1853848	9606.ENSP00000352627	9606.ENSP00000352442	0	0	0	0	0	0.251	0.8	0.638	0.941
MYC	CDCA7	1856789	1848898	9606.ENSP00000367207	9606.ENSP00000306968	0	0	0	0	0	0	0.9	0.44	0.941
MLL	CHD8	1862045	1858781	9606.ENSP00000436786	9606.ENSP00000382863	0	0	0	0	0	0.149	0.9	0.371	0.941
KAT5	H2AFZ	1852315	1847723	9606.ENSP00000340330	9606.ENSP00000296417	0	0	0	0	0	0.696	0	0.815	0.941
HIST3H2BB	HIST2H2AC	1857956	1851443	9606.ENSP00000375736	9606.ENSP00000332194	0	0	0	0	0	0.251	0.8	0.638	0.941
HNRNPK	NCL	1856467	1850027	9606.ENSP00000365439	9606.ENSP00000318195	0	0	0	0	0	0.417	0	0.904	0.941
BRCA1	SP1	1861387	1851138	9606.ENSP00000418960	9606.ENSP00000329357	0	0	0	0	0	0.917	0	0.325	0.941
HIST1H2BH	HIST1H2AD	1853333	1852412	9606.ENSP00000348706	9606.ENSP00000341094	0	0	0	0	0	0.251	0.8	0.642	0.941
KAT5	KAT2B	1852315	1845408	9606.ENSP00000340330	9606.ENSP00000263754	0	0	0	0	0	0.506	0	0.886	0.941
ALYREF	HNRNPD	1861534	1849608	9606.ENSP00000421592	9606.ENSP00000313199	0	0	0	0	0	0.27	0.9	0.264	0.941
H2AFY2	HIST1H2BA	1855864	1846410	9606.ENSP00000362352	9606.ENSP00000274764	0	0	0	0	0	0.251	0.8	0.642	0.941
MYC	KAT2A	1856789	1843061	9606.ENSP00000367207	9606.ENSP00000225916	0	0	0	0	0	0.231	0	0.926	0.941
TOP1	SUPT16H	1854138	1842582	9606.ENSP00000354522	9606.ENSP00000216297	0	0	0	0	0	0.932	0	0.178	0.941
POLR2B	CCNT2	1849572	1845488	9606.ENSP00000312735	9606.ENSP00000264157	0	0	0	0	0	0	0.9	0.44	0.941
HIST1H2BN	HIST1H2AM	1858441	1853877	9606.ENSP00000380177	9606.ENSP00000352627	0	0	0	0	0	0.251	0.8	0.643	0.941
RBBP7	YY1	1857150	1845097	9606.ENSP00000369424	9606.ENSP00000262238	0	0	0	0	0	0	0.9	0.435	0.941
POLR2A	MED6	1849743	1844426	9606.ENSP00000314949	9606.ENSP00000256379	0	0	0	0	0	0.832	0	0.668	0.941
HIST3H2BB	HIST3H2A	1857956	1854432	9606.ENSP00000375736	9606.ENSP00000355656	0	0	0	0	0	0.251	0.8	0.638	0.941
HIST1H2BK	HIST1H2AD	1853439	1852412	9606.ENSP00000349430	9606.ENSP00000341094	0	0	0	0	0	0.251	0.8	0.64	0.941
MAX	MGA	1853721	1842774	9606.ENSP00000351490	9606.ENSP00000219905	0	0	0	0	0	0.423	0.9	0.071	0.941
HMGB1	SMARCB1	1852653	1845291	9606.ENSP00000343040	9606.ENSP00000263121	0	0	0	0	0	0.363	0.9	0.151	0.941
MYC	UBTF	1856789	1848435	9606.ENSP00000367207	9606.ENSP00000302640	0	0	0	0	0	0.23	0.9	0.301	0.941
TAF2	TAF3	1856824	1852303	9606.ENSP00000367406	9606.ENSP00000340271	0	0	0	0	0	0	0.9	0.442	0.941
POLR2B	SUPT16H	1849572	1842582	9606.ENSP00000312735	9606.ENSP00000216297	0	0	0	0	0	0.099	0.9	0.403	0.941
CHD8	TAF1	1858781	1846471	9606.ENSP00000382863	9606.ENSP00000276072	0	0	0	0	0	0.364	0.9	0.158	0.941
H2AFX	HIST1H2BB	1856252	1853610	9606.ENSP00000364310	9606.ENSP00000350580	0	0	0	0	0	0.251	0.8	0.643	0.941
MAX	KAT5	1853721	1852315	9606.ENSP00000351490	9606.ENSP00000340330	0	0	0	0	0	0.362	0.9	0.145	0.94
HIST3H2BB	H2AFY2	1857956	1855864	9606.ENSP00000375736	9606.ENSP00000362352	0	0	0	0	0	0.251	0.8	0.636	0.94
TRRAP	YY1	1853208	1845097	9606.ENSP00000347733	9606.ENSP00000262238	0	0	0	0	0	0.099	0.9	0.39	0.94
HIST1H3A	SMARCA5	1853568	1846833	9606.ENSP00000350275	9606.ENSP00000283131	0	0	0	0	0	0.928	0	0.191	0.94
HIST1H2AE	HIST1H2BA	1848523	1846410	9606.ENSP00000303373	9606.ENSP00000274764	0	0	0	0	0	0.251	0.8	0.635	0.94
XRCC5	ILF2	1857983	1854278	9606.ENSP00000375977	9606.ENSP00000355011	0	0	0	0	0	0.564	0	0.868	0.94
HIST3H2BB	HIST1H2AM	1857956	1853877	9606.ENSP00000375736	9606.ENSP00000352627	0	0	0	0	0	0.251	0.8	0.632	0.94
PLK1	MCM3	1848135	1843226	9606.ENSP00000300093	9606.ENSP00000229854	0	0	0	0	0	0.576	0	0.866	0.94
PCBP2	HNRNPU	1853847	1846836	9606.ENSP00000352438	9606.ENSP00000283179	0	0	0	0	0	0	0.9	0.43	0.94
BRCA1	RBBP7	1861387	1857150	9606.ENSP00000418960	9606.ENSP00000369424	0	0	0	0	0	0.913	0	0.345	0.94
RELA	CDK9	1858923	1855868	9606.ENSP00000384273	9606.ENSP00000362361	0	0	0	0	0	0.576	0	0.866	0.94
ERCC2	CCNT1	1857962	1845024	9606.ENSP00000375809	9606.ENSP00000261900	0	0	0	0	0	0.3	0.9	0.211	0.94
HIST1H2BN	HIST2H2AC	1858441	1851443	9606.ENSP00000380177	9606.ENSP00000332194	0	0	0	0	0	0.251	0.8	0.633	0.94
NUP153	C1QBP	1845057	1843043	9606.ENSP00000262077	9606.ENSP00000225698	0	0	0	0	0	0.94	0	0	0.94
RBBP4	NPM1	1855919	1847808	9606.ENSP00000362592	9606.ENSP00000296930	0	0	0	0	0	0.303	0.9	0.199	0.939
HIST1H2AH	HIST1H2BB	1856690	1853610	9606.ENSP00000366679	9606.ENSP00000350580	0	0	0	0	0	0.251	0.8	0.627	0.939
HNRNPK	PCBP1	1856467	1848744	9606.ENSP00000365439	9606.ENSP00000305556	0	0	0	0.759	0	0.285	0.9	0.812	0.939
HDAC1	H2AFV	1855935	1849067	9606.ENSP00000362649	9606.ENSP00000308405	0	0	0	0	0	0.426	0.8	0.516	0.939
SDC4	THBS1	1855743	1844779	9606.ENSP00000361818	9606.ENSP00000260356	0	0	0	0	0	0	0.9	0.423	0.939
RBBP4	YY1	1855919	1845097	9606.ENSP00000362592	9606.ENSP00000262238	0	0	0	0	0	0	0.9	0.415	0.939
H2AFX	KAT5	1856252	1852315	9606.ENSP00000364310	9606.ENSP00000340330	0	0	0	0	0	0.851	0	0.607	0.939
HMGB1	SMARCC2	1852653	1845915	9606.ENSP00000343040	9606.ENSP00000267064	0	0	0	0	0	0.35	0.9	0.145	0.939
PCBP2	HNRNPM	1853847	1850730	9606.ENSP00000352438	9606.ENSP00000325376	0	0	0	0	0	0.221	0.9	0.29	0.939
H2AFY	HIST1H2BB	1861595	1853610	9606.ENSP00000423563	9606.ENSP00000350580	0	0	0	0	0	0.251	0.8	0.628	0.939
ERCC2	POLR2B	1857962	1849572	9606.ENSP00000375809	9606.ENSP00000312735	0	0	0	0	0	0	0.9	0.416	0.939
JUN	POLR2A	1855436	1849743	9606.ENSP00000360266	9606.ENSP00000314949	0	0	0	0	0	0.237	0.9	0.272	0.939
XRCC6	NCL	1853821	1850027	9606.ENSP00000352257	9606.ENSP00000318195	0	0	0	0	0	0.57	0	0.864	0.939
H2AFY2	HIST1H2BB	1855864	1853610	9606.ENSP00000362352	9606.ENSP00000350580	0	0	0	0	0	0.251	0.8	0.627	0.939
GNL3	GTPBP4	1859893	1854068	9606.ENSP00000395772	9606.ENSP00000354040	0	0	0	0	0	0.832	0	0.654	0.939
HIST1H2BL	HIST1H2AC	1856676	1850346	9606.ENSP00000366618	9606.ENSP00000321389	0	0	0	0	0	0.251	0.8	0.627	0.939
TUBB4B	TUBB6	1852441	1850072	9606.ENSP00000341289	9606.ENSP00000318697	0	0	0	0.987	0	0.417	0.9	0.436	0.939
XPO1	NFKB1	1858987	1843094	9606.ENSP00000384863	9606.ENSP00000226574	0	0	0	0	0	0.102	0.9	0.385	0.939
CDK1	SMC2	1858283	1847012	9606.ENSP00000378699	9606.ENSP00000286398	0	0	0	0	0	0.213	0.9	0.287	0.939
RFC1	RFC2	1857450	1842227	9606.ENSP00000371321	9606.ENSP00000055077	0	0	0	0.629	0	0.923	0	0.567	0.939
PLK1	NPM1	1848135	1847808	9606.ENSP00000300093	9606.ENSP00000296930	0	0	0	0	0	0.576	0	0.863	0.939
NUP98	NUP93	1849839	1849329	9606.ENSP00000316032	9606.ENSP00000310668	0	0	0	0	0	0.562	0	0.867	0.939
CHD4	MBD2	1853454	1844432	9606.ENSP00000349508	9606.ENSP00000256429	0	0	0	0	0	0	0.9	0.411	0.938
RAF1	EGR1	1844086	1843543	9606.ENSP00000251849	9606.ENSP00000239938	0	0	0	0	0	0	0	0.937	0.938
CCNT1	MDFIC	1845024	1844531	9606.ENSP00000261900	9606.ENSP00000257724	0	0	0	0	0	0.564	0	0.864	0.938
SF3B1	HNRNPD	1851836	1849608	9606.ENSP00000335321	9606.ENSP00000313199	0	0	0	0	0	0.362	0.9	0.118	0.938
NUP98	IPO5	1849839	1844939	9606.ENSP00000316032	9606.ENSP00000261574	0	0	0	0	0	0.9	0	0.409	0.938
GNL3	NOP56	1859893	1857348	9606.ENSP00000395772	9606.ENSP00000370589	0	0	0	0	0	0.925	0	0.212	0.938
TUBA1A	TUBB4A	1848244	1845475	9606.ENSP00000301071	9606.ENSP00000264071	0	0	0	0.918	0	0.364	0.9	0.804	0.938
KAT5	YY1	1852315	1845097	9606.ENSP00000340330	9606.ENSP00000262238	0	0	0	0	0	0.134	0.9	0.35	0.938
PES1	BRIX1	1853086	1852151	9606.ENSP00000346725	9606.ENSP00000338862	0	0	0	0	0	0.938	0	0	0.938
CDK2	CREBBP	1845906	1845124	9606.ENSP00000266970	9606.ENSP00000262367	0	0	0	0	0	0.725	0	0.784	0.938
NUP88	KPNB1	1863294	1847208	9606.ENSP00000458954	9606.ENSP00000290158	0	0	0	0	0	0	0.9	0.413	0.938
CEBPB	KAT2B	1848728	1845408	9606.ENSP00000305422	9606.ENSP00000263754	0	0	0	0	0	0.576	0	0.859	0.938
ITGAV	LRP1	1844842	1843653	9606.ENSP00000261023	9606.ENSP00000243077	0	0	0	0	0	0	0.9	0.413	0.938
TP53	SOX4	1846083	1843737	9606.ENSP00000269305	9606.ENSP00000244745	0	0	0	0	0	0.567	0	0.864	0.938
HNRNPM	SNRNP200	1850730	1849929	9606.ENSP00000325376	9606.ENSP00000317123	0	0	0	0	0	0.236	0.9	0.247	0.937
HDAC2	H2AFV	1861837	1849067	9606.ENSP00000430432	9606.ENSP00000308405	0	0	0	0	0	0.426	0.8	0.503	0.937
HIST1H2BL	HIST1H2AE	1856676	1848523	9606.ENSP00000366618	9606.ENSP00000303373	0	0	0	0	0	0.251	0.8	0.617	0.937
RANGAP1	NUP85	1853317	1843765	9606.ENSP00000348577	9606.ENSP00000245544	0	0	0	0	0	0	0.9	0.401	0.937
WHSC2	CCNT1	1857584	1845024	9606.ENSP00000372335	9606.ENSP00000261900	0	0	0	0	0	0	0.9	0.402	0.937
TUBB4A	TUBA4A	1845475	1843912	9606.ENSP00000264071	9606.ENSP00000248437	0	0	0	0.918	0	0.364	0.9	0.754	0.937
USF1	PRKDC	1854711	1849621	9606.ENSP00000356999	9606.ENSP00000313420	0	0	0	0	0	0.545	0	0.866	0.937
EP300	NFKBIA	1845316	1842621	9606.ENSP00000263253	9606.ENSP00000216797	0	0	0	0	0	0	0.9	0.398	0.937
H2AFY2	HIST1H2BM	1855864	1853848	9606.ENSP00000362352	9606.ENSP00000352442	0	0	0	0	0	0.251	0.8	0.618	0.937
H2AFY	HIST1H2BM	1861595	1853848	9606.ENSP00000423563	9606.ENSP00000352442	0	0	0	0	0	0.251	0.8	0.614	0.937
H2AFX	HIST1H2BJ	1856252	1852636	9606.ENSP00000364310	9606.ENSP00000342886	0	0	0	0	0	0.301	0.8	0.587	0.937
YBX1	PCBP1	1855704	1848744	9606.ENSP00000361626	9606.ENSP00000305556	0	0	0	0	0	0	0.9	0.396	0.937
TUBA1B	TUBB4A	1851928	1845475	9606.ENSP00000336799	9606.ENSP00000264071	0	0	0	0.919	0	0.364	0.9	0.804	0.937
CTDP1	CCNT2	1848076	1845488	9606.ENSP00000299543	9606.ENSP00000264157	0	0	0	0	0	0	0.9	0.4	0.937
RELA	TP53	1858923	1846083	9606.ENSP00000384273	9606.ENSP00000269305	0	0	0	0	0	0	0	0.937	0.937
HIST1H2BB	HIST1H2AC	1853610	1850346	9606.ENSP00000350580	9606.ENSP00000321389	0	0	0	0	0	0.251	0.8	0.617	0.937
HIST1H1B	SIRT1	1851214	1842473	9606.ENSP00000330074	9606.ENSP00000212015	0	0	0	0	0	0.576	0	0.858	0.937
TUBA1C	TUBB4A	1848245	1845475	9606.ENSP00000301072	9606.ENSP00000264071	0	0	0	0.919	0	0.364	0.9	0.781	0.937
HIST1H2BL	HIST2H2AC	1856676	1851443	9606.ENSP00000366618	9606.ENSP00000332194	0	0	0	0	0	0.251	0.8	0.616	0.937
HIST3H2BB	HIST1H2AE	1857956	1848523	9606.ENSP00000375736	9606.ENSP00000303373	0	0	0	0	0	0.251	0.8	0.618	0.937
HIST1H2BI	H2AFX	1856742	1856252	9606.ENSP00000366962	9606.ENSP00000364310	0	0	0	0	0	0.251	0.8	0.617	0.937
HIST3H2A	HIST1H2BJ	1854432	1852636	9606.ENSP00000355656	9606.ENSP00000342886	0	0	0	0	0	0.301	0.8	0.589	0.937
HNRNPH1	PCBP1	1853404	1848744	9606.ENSP00000349168	9606.ENSP00000305556	0	0	0	0	0	0	0.9	0.395	0.936
SMARCA2	TBP	1845805	1843249	9606.ENSP00000265773	9606.ENSP00000230354	0	0	0	0	0	0.787	0	0.715	0.936
CREBBP	TBP	1845124	1843249	9606.ENSP00000262367	9606.ENSP00000230354	0	0	0	0	0	0.69	0	0.801	0.936
CREB1	ESRRA	1859295	1842111	9606.ENSP00000387699	9606.ENSP00000000442	0	0	0	0	0	0	0.9	0.391	0.936
CCNT1	GRN	1845024	1842222	9606.ENSP00000261900	9606.ENSP00000053867	0	0	0	0	0	0.564	0	0.86	0.936
HIST1H2AH	HIST1H2BK	1856690	1853439	9606.ENSP00000366679	9606.ENSP00000349430	0	0	0	0	0	0.251	0.8	0.608	0.936
CTDP1	CCNH	1848076	1844473	9606.ENSP00000299543	9606.ENSP00000256897	0	0	0	0	0	0	0.9	0.391	0.936
WDR5	RUVBL1	1853715	1850035	9606.ENSP00000351446	9606.ENSP00000318297	0	0	0	0	0	0.35	0.9	0.102	0.936
TRIM24	TP53	1852334	1846083	9606.ENSP00000340507	9606.ENSP00000269305	0	0	0	0	0	0.912	0	0.31	0.936
WDR5	MGA	1853715	1842774	9606.ENSP00000351446	9606.ENSP00000219905	0	0	0	0	0	0.35	0.9	0.101	0.936
H2AFY2	HIST1H2BH	1855864	1853333	9606.ENSP00000362352	9606.ENSP00000348706	0	0	0	0	0	0.251	0.8	0.609	0.936
HIST1H2BL	HIST1H2AM	1856676	1853877	9606.ENSP00000366618	9606.ENSP00000352627	0	0	0	0	0	0.251	0.8	0.611	0.936
SNRNP200	HNRNPD	1849929	1849608	9606.ENSP00000317123	9606.ENSP00000313199	0	0	0	0	0	0.301	0.9	0.168	0.936
HDAC2	UBTF	1861837	1848435	9606.ENSP00000430432	9606.ENSP00000302640	0	0	0	0	0	0.127	0.9	0.327	0.936
HNRNPF	PCBP1	1852109	1848744	9606.ENSP00000338477	9606.ENSP00000305556	0	0	0	0	0	0	0.9	0.395	0.936
MYC	SIN3A	1856789	1854005	9606.ENSP00000367207	9606.ENSP00000353622	0	0	0	0	0	0	0.9	0.389	0.936
DHX9	POLR2B	1854615	1849572	9606.ENSP00000356520	9606.ENSP00000312735	0	0	0	0	0	0	0.9	0.388	0.936
MYC	NFKBIA	1856789	1842621	9606.ENSP00000367207	9606.ENSP00000216797	0	0	0	0	0	0	0.9	0.389	0.936
CDK9	SSRP1	1855868	1846565	9606.ENSP00000362361	9606.ENSP00000278412	0	0	0	0	0	0	0.9	0.391	0.936
HIST1H2AM	HIST1H2BH	1853877	1853333	9606.ENSP00000352627	9606.ENSP00000348706	0	0	0	0	0	0.251	0.8	0.603	0.935
AHCTF1	NUP93	1854384	1849329	9606.ENSP00000355465	9606.ENSP00000310668	0	0	0	0	0	0.771	0	0.728	0.935
HMGB1	POLR2A	1852653	1849743	9606.ENSP00000343040	9606.ENSP00000314949	0	0	0	0	0	0.111	0.9	0.335	0.935
H2AFY	HIST3H2BB	1861595	1857956	9606.ENSP00000423563	9606.ENSP00000375736	0	0	0	0	0	0.251	0.8	0.603	0.935
CCNT1	PAF1	1845024	1842822	9606.ENSP00000261900	9606.ENSP00000221265	0	0	0	0	0	0	0.9	0.378	0.935
XPO1	RELA	1858987	1858923	9606.ENSP00000384863	9606.ENSP00000384273	0	0	0	0	0	0	0.9	0.382	0.935
CDCA7L	MYC	1858889	1856789	9606.ENSP00000383986	9606.ENSP00000367207	0	0	0	0	0	0.576	0	0.853	0.935
ORC5	CDK2	1847866	1845906	9606.ENSP00000297431	9606.ENSP00000266970	0	0	0	0	0	0	0.9	0.385	0.935
HIST1H2BN	HIST1H2AE	1858441	1848523	9606.ENSP00000380177	9606.ENSP00000303373	0	0	0	0	0	0.251	0.8	0.606	0.935
HIST3H2A	HIST1H2BM	1854432	1853848	9606.ENSP00000355656	9606.ENSP00000352442	0	0	0	0	0	0.301	0.8	0.576	0.935
GTF2B	MNAT1	1855275	1844871	9606.ENSP00000359531	9606.ENSP00000261245	0	0	0	0	0	0	0.9	0.379	0.935
TAF11	TAF6L	1854176	1847468	9606.ENSP00000354633	9606.ENSP00000294168	0	0	0	0	0	0.827	0	0.643	0.935
MED14	CREBBP	1850574	1845124	9606.ENSP00000323720	9606.ENSP00000262367	0	0	0	0	0	0.202	0.9	0.251	0.935
NAT10	AATF	1844540	1843020	9606.ENSP00000257829	9606.ENSP00000225402	0	0	0	0	0	0.89	0	0.434	0.935
H2AFJ	HIST1H2BI	1857794	1856742	9606.ENSP00000373730	9606.ENSP00000366962	0	0	0	0	0	0.251	0.8	0.601	0.935
CDK9	GTF2H1	1855868	1845828	9606.ENSP00000362361	9606.ENSP00000265963	0	0	0	0	0	0	0.9	0.381	0.935
H2AFY	HIST1H2BO	1861595	1848526	9606.ENSP00000423563	9606.ENSP00000303408	0	0	0	0	0	0.251	0.8	0.603	0.935
LARP7	CCNT1	1849695	1845024	9606.ENSP00000314311	9606.ENSP00000261900	0	0	0	0	0	0.811	0	0.665	0.934
TOP2A	NCAPH	1860923	1843566	9606.ENSP00000411532	9606.ENSP00000240423	0	0	0	0	0	0.667	0	0.81	0.934
MEAF6	RUVBL1	1855823	1850035	9606.ENSP00000362166	9606.ENSP00000318297	0	0	0	0	0	0	0.9	0.37	0.934
H2AFJ	HIST1H2BJ	1857794	1852636	9606.ENSP00000373730	9606.ENSP00000342886	0	0	0	0	0	0.301	0.8	0.569	0.934
CCNE1	CCNB1	1845190	1844435	9606.ENSP00000262643	9606.ENSP00000256442	0	0	0	0.676	0	0.147	0.9	0.811	0.934
ERCC2	CCNT2	1857962	1845488	9606.ENSP00000375809	9606.ENSP00000264157	0	0	0	0	0	0.3	0.9	0.135	0.934
DHX9	SNRNP200	1854615	1849929	9606.ENSP00000356520	9606.ENSP00000317123	0	0	0	0	0	0.138	0.9	0.297	0.934
HIST1H2BK	HIST1H2AE	1853439	1848523	9606.ENSP00000349430	9606.ENSP00000303373	0	0	0	0	0	0.251	0.8	0.595	0.934
HNRNPK	TBP	1856467	1843249	9606.ENSP00000365439	9606.ENSP00000230354	0	0	0	0	0	0.576	0	0.851	0.934
CREB1	GRIN2B	1859295	1846639	9606.ENSP00000387699	9606.ENSP00000279593	0	0	0	0	0	0	0	0.934	0.934
RBBP4	SMARCA2	1855919	1845805	9606.ENSP00000362592	9606.ENSP00000265773	0	0	0	0	0	0.778	0	0.714	0.934
HIST3H2BB	H2AFX	1857956	1856252	9606.ENSP00000375736	9606.ENSP00000364310	0	0	0	0	0	0.251	0.8	0.598	0.934
KPNB1	NUP205	1847208	1846987	9606.ENSP00000290158	9606.ENSP00000285968	0	0	0	0	0	0	0.9	0.376	0.934
H2AFX	HIST1H2BA	1856252	1846410	9606.ENSP00000364310	9606.ENSP00000274764	0	0	0	0	0	0.251	0.8	0.596	0.934
TUBB4B	POLR2B	1852441	1849572	9606.ENSP00000341289	9606.ENSP00000312735	0	0	0	0	0	0.922	0	0.195	0.934
DHX9	HNRNPD	1854615	1849608	9606.ENSP00000356520	9606.ENSP00000313199	0	0	0	0	0	0.149	0.9	0.297	0.934
HIST1H2BI	H2AFY2	1856742	1855864	9606.ENSP00000366962	9606.ENSP00000362352	0	0	0	0	0	0.251	0.8	0.589	0.933
MAX	WDR5	1853721	1853715	9606.ENSP00000351490	9606.ENSP00000351446	0	0	0	0	0	0.362	0.9	0	0.933
KAT2B	SNW1	1845408	1844933	9606.ENSP00000263754	9606.ENSP00000261531	0	0	0	0	0	0	0.9	0.361	0.933
HIST1H2BM	HIST1H2AC	1853848	1850346	9606.ENSP00000352442	9606.ENSP00000321389	0	0	0	0	0	0.301	0.8	0.564	0.933
WDR5	TAF9	1853715	1842675	9606.ENSP00000351446	9606.ENSP00000217893	0	0	0	0	0	0.35	0.9	0.054	0.933
HIST1H2BK	HIST1H2AC	1853439	1850346	9606.ENSP00000349430	9606.ENSP00000321389	0	0	0	0	0	0.251	0.8	0.59	0.933
HIST1H2BN	HIST1H2AC	1858441	1850346	9606.ENSP00000380177	9606.ENSP00000321389	0	0	0	0	0	0.251	0.8	0.592	0.933
ANAPC7	CCNB1	1859796	1844435	9606.ENSP00000394394	9606.ENSP00000256442	0	0	0	0	0	0	0.9	0.367	0.933
ALYREF	NUP153	1861534	1845057	9606.ENSP00000421592	9606.ENSP00000262077	0	0	0	0	0	0.25	0.9	0.185	0.933
H3F3A	HIST1H4G	1854454	1843723	9606.ENSP00000355778	9606.ENSP00000244537	0	0	0	0	0	0.301	0.8	0.562	0.933
H2AFJ	HIST1H2BM	1857794	1853848	9606.ENSP00000373730	9606.ENSP00000352442	0	0	0	0	0	0.301	0.8	0.564	0.933
EP400	MEAF6	1857832	1855823	9606.ENSP00000374212	9606.ENSP00000362166	0	0	0	0	0	0	0.9	0.359	0.933
JUN	TGIF1	1855436	1850975	9606.ENSP00000360266	9606.ENSP00000327959	0	0	0	0	0	0.566	0	0.851	0.933
PRKDC	POLM	1849621	1843616	9606.ENSP00000313420	9606.ENSP00000242248	0	0	0	0	0	0	0.9	0.36	0.933
H2AFY	HIST1H2BK	1861595	1853439	9606.ENSP00000423563	9606.ENSP00000349430	0	0	0	0	0	0.251	0.8	0.592	0.933
HIST1H2AC	HIST1H2BA	1850346	1846410	9606.ENSP00000321389	9606.ENSP00000274764	0	0	0	0	0	0.251	0.8	0.589	0.933
CDK1	PSMB2	1858283	1855861	9606.ENSP00000378699	9606.ENSP00000362334	0	0	0	0	0	0.367	0.9	0	0.933
HNRNPR	DHX9	1856150	1854615	9606.ENSP00000363745	9606.ENSP00000356520	0	0	0	0	0	0	0.9	0.359	0.933
HIST3H2A	HIST1H2BB	1854432	1853610	9606.ENSP00000355656	9606.ENSP00000350580	0	0	0	0	0	0.251	0.8	0.59	0.933
HDAC1	PPP1CC	1855935	1851808	9606.ENSP00000362649	9606.ENSP00000335084	0	0	0	0	0	0.914	0	0.249	0.933
HIST3H3	HIST1H4G	1854433	1843723	9606.ENSP00000355657	9606.ENSP00000244537	0	0	0	0	0	0.301	0.8	0.562	0.933
HIST1H3F	HIST1H4G	1862281	1843723	9606.ENSP00000444823	9606.ENSP00000244537	0	0	0	0	0	0.301	0.8	0.562	0.933
HIST3H2BB	HIST1H2AH	1857956	1856690	9606.ENSP00000375736	9606.ENSP00000366679	0	0	0	0	0	0.251	0.8	0.593	0.933
PSMB2	CDK2	1855861	1845906	9606.ENSP00000362334	9606.ENSP00000266970	0	0	0	0	0	0.367	0.9	0	0.933
MYC	TAF10	1856789	1848061	9606.ENSP00000367207	9606.ENSP00000299424	0	0	0	0	0	0.231	0.9	0.206	0.933
H2AFX	SMARCA4	1856252	1853627	9606.ENSP00000364310	9606.ENSP00000350720	0	0	0	0	0	0.874	0	0.49	0.933
HIST1H2BJ	HIST1H2AJ	1852636	1851044	9606.ENSP00000342886	9606.ENSP00000328484	0	0	0	0	0	0.301	0.8	0.564	0.933
IFI6	IRF1	1852601	1843757	9606.ENSP00000342513	9606.ENSP00000245414	0	0	0	0	0	0	0.9	0.358	0.933
SP1	PRKDC	1851138	1849621	9606.ENSP00000329357	9606.ENSP00000313420	0	0	0	0	0	0.592	0	0.843	0.933
HIST1H2BL	H2AFX	1856676	1856252	9606.ENSP00000366618	9606.ENSP00000364310	0	0	0	0	0	0.251	0.8	0.592	0.933
WDR5	TAF4	1853715	1844180	9606.ENSP00000351446	9606.ENSP00000252996	0	0	0	0	0	0.35	0.9	0.049	0.932
NOP2	KIAA0020	1858730	1858536	9606.ENSP00000382392	9606.ENSP00000380982	0	0	0	0	0	0.903	0	0.328	0.932
PCBP1	HNRNPU	1848744	1846836	9606.ENSP00000305556	9606.ENSP00000283179	0	0	0	0	0	0	0.9	0.356	0.932
TAF5	POLR2A	1855115	1849743	9606.ENSP00000358854	9606.ENSP00000314949	0	0	0	0	0	0	0.9	0.357	0.932
SENP3	EP300	1860430	1845316	9606.ENSP00000403712	9606.ENSP00000263253	0	0	0	0	0	0.913	0	0.253	0.932
MTA3	MTA2	1859013	1846587	9606.ENSP00000385045	9606.ENSP00000278823	0	0	0	0.979	0	0.342	0.9	0.822	0.932
H2AFY	HIST1H2BH	1861595	1853333	9606.ENSP00000423563	9606.ENSP00000348706	0	0	0	0	0	0.251	0.8	0.583	0.932
HIST1H3A	HIST2H2AC	1853568	1851443	9606.ENSP00000350275	9606.ENSP00000332194	0	0	0	0	0	0.84	0	0.592	0.932
HNRNPR	PCBP1	1856150	1848744	9606.ENSP00000363745	9606.ENSP00000305556	0	0	0	0	0	0	0.9	0.354	0.932
H2AFY2	HIST1H2BJ	1855864	1852636	9606.ENSP00000362352	9606.ENSP00000342886	0	0	0	0	0	0.251	0.8	0.586	0.932
HIST1H2AH	HIST1H2BJ	1856690	1852636	9606.ENSP00000366679	9606.ENSP00000342886	0	0	0	0	0	0.251	0.8	0.587	0.932
GTF2H3	CCNT2	1862288	1845488	9606.ENSP00000445162	9606.ENSP00000264157	0	0	0	0	0	0.319	0.9	0.092	0.932
HNRNPR	PCBP2	1856150	1853847	9606.ENSP00000363745	9606.ENSP00000352438	0	0	0	0	0	0	0.9	0.35	0.932
CREBBP	NFKBIA	1845124	1842621	9606.ENSP00000262367	9606.ENSP00000216797	0	0	0	0	0	0	0.9	0.348	0.932
NCL	EP300	1850027	1845316	9606.ENSP00000318195	9606.ENSP00000263253	0	0	0	0	0	0	0.9	0.35	0.932
ALYREF	DHX9	1861534	1854615	9606.ENSP00000421592	9606.ENSP00000356520	0	0	0	0	0	0.211	0.9	0.214	0.932
TUBA1A	TUBB1	1848244	1842641	9606.ENSP00000301071	9606.ENSP00000217133	0	0	0	0.907	0	0.304	0.9	0.685	0.931
POLR2A	HTATSF1	1849743	1842704	9606.ENSP00000314949	9606.ENSP00000218364	0	0	0	0	0	0.808	0	0.654	0.931
UBTF	KAT2B	1848435	1845408	9606.ENSP00000302640	9606.ENSP00000263754	0	0	0	0	0	0.101	0.9	0.299	0.931
HIST3H2A	HIST1H2BK	1854432	1853439	9606.ENSP00000355656	9606.ENSP00000349430	0	0	0	0	0	0.251	0.8	0.577	0.931
H2AFV	YEATS4	1849067	1843878	9606.ENSP00000308405	9606.ENSP00000247843	0	0	0	0	0	0.815	0	0.644	0.931
BRCA1	XRCC5	1861387	1857983	9606.ENSP00000418960	9606.ENSP00000375977	0	0	0	0	0	0.812	0	0.649	0.931
HDAC1	CCNE1	1855935	1845190	9606.ENSP00000362649	9606.ENSP00000262643	0	0	0	0	0	0.109	0.9	0.289	0.931
CDK2	MLH1	1845906	1843304	9606.ENSP00000266970	9606.ENSP00000231790	0	0	0	0	0	0.094	0.9	0.301	0.931
TUBA4A	TUBB1	1843912	1842641	9606.ENSP00000248437	9606.ENSP00000217133	0	0	0	0.908	0	0.304	0.9	0.597	0.931
CDK9	POLR2B	1855868	1849572	9606.ENSP00000362361	9606.ENSP00000312735	0	0	0	0	0	0.109	0.9	0.29	0.931
ADAR	IRF1	1854805	1843757	9606.ENSP00000357459	9606.ENSP00000245414	0	0	0	0	0	0	0.9	0.347	0.931
TUBA1C	TUBB1	1848245	1842641	9606.ENSP00000301072	9606.ENSP00000217133	0	0	0	0.907	0	0.304	0.9	0.68	0.931
GTF2B	IRF1	1855275	1843757	9606.ENSP00000359531	9606.ENSP00000245414	0	0	0	0	0	0	0.9	0.344	0.931
ALYREF	NUP85	1861534	1843765	9606.ENSP00000421592	9606.ENSP00000245544	0	0	0	0	0	0.213	0.9	0.2	0.931
H2AFX	HIST1H2BO	1856252	1848526	9606.ENSP00000364310	9606.ENSP00000303408	0	0	0	0	0	0.251	0.8	0.581	0.931
MTA1	KAT2B	1851603	1845408	9606.ENSP00000333633	9606.ENSP00000263754	0	0	0	0	0	0	0.9	0.341	0.931
TUBA8	TUBB1	1851574	1842641	9606.ENSP00000333326	9606.ENSP00000217133	0	0	0	0.908	0	0.304	0.9	0.628	0.931
HDAC2	CBX4	1861837	1846093	9606.ENSP00000430432	9606.ENSP00000269397	0	0	0	0	0	0	0.9	0.347	0.931
H2AFX	HDAC1	1856252	1855935	9606.ENSP00000364310	9606.ENSP00000362649	0	0	0	0	0	0.17	0.8	0.618	0.931
MYC	PRKDC	1856789	1849621	9606.ENSP00000367207	9606.ENSP00000313420	0	0	0	0	0	0.143	0	0.922	0.931
SMARCA4	CEBPB	1853627	1848728	9606.ENSP00000350720	9606.ENSP00000305422	0	0	0	0	0	0.913	0	0.243	0.931
DMAP1	H2AFV	1849566	1849067	9606.ENSP00000312697	9606.ENSP00000308405	0	0	0	0	0	0.827	0	0.619	0.931
JUN	DDX21	1855436	1853016	9606.ENSP00000360266	9606.ENSP00000346120	0	0	0	0	0	0.576	0	0.843	0.931
H2AFY	HIST1H2BI	1861595	1856742	9606.ENSP00000423563	9606.ENSP00000366962	0	0	0	0	0	0.251	0.8	0.57	0.93
H2AFX	HIST1H2BK	1856252	1853439	9606.ENSP00000364310	9606.ENSP00000349430	0	0	0	0	0	0.251	0.8	0.571	0.93
NAP1L4	H2AFZ	1857242	1847723	9606.ENSP00000369915	9606.ENSP00000296417	0	0	0	0	0	0.723	0	0.759	0.93
ERCC3	SSRP1	1846961	1846565	9606.ENSP00000285398	9606.ENSP00000278412	0	0	0	0	0	0	0.9	0.332	0.93
TRRAP	TAF4	1853208	1844180	9606.ENSP00000347733	9606.ENSP00000252996	0	0	0	0	0	0	0.9	0.33	0.93
H2AFX	HIST1H3A	1856252	1853568	9606.ENSP00000364310	9606.ENSP00000350275	0	0	0	0	0	0.849	0	0.56	0.93
XPO1	NFATC2	1858987	1858353	9606.ENSP00000384863	9606.ENSP00000379330	0	0	0	0	0	0	0.9	0.33	0.93
SP1	CCNB1	1851138	1844435	9606.ENSP00000329357	9606.ENSP00000256442	0	0	0	0	0	0.117	0.9	0.28	0.93
MYC	TAF12	1856789	1845448	9606.ENSP00000367207	9606.ENSP00000263974	0	0	0	0	0	0.231	0.9	0.167	0.93
CDK9	COBRA1	1855868	1852223	9606.ENSP00000362361	9606.ENSP00000339495	0	0	0	0	0	0	0.9	0.33	0.93
HIST1H2AH	HIST1H2BM	1856690	1853848	9606.ENSP00000366679	9606.ENSP00000352442	0	0	0	0	0	0.251	0.8	0.575	0.93
NAP1L4	H2AFV	1857242	1849067	9606.ENSP00000369915	9606.ENSP00000308405	0	0	0	0	0	0.723	0	0.759	0.93
ACTL6A	H2AFZ	1860014	1847723	9606.ENSP00000397552	9606.ENSP00000296417	0	0	0	0	0	0.904	0	0.303	0.93
KAT5	EP300	1852315	1845316	9606.ENSP00000340330	9606.ENSP00000263253	0	0	0	0	0	0.665	0	0.8	0.93
BRCA1	PPP1CA	1861387	1850792	9606.ENSP00000418960	9606.ENSP00000326031	0	0	0	0	0	0.915	0	0.208	0.93
GTF2H1	CCNT2	1845828	1845488	9606.ENSP00000265963	9606.ENSP00000264157	0	0	0	0	0	0.3	0.9	0.081	0.93
HIST1H2BH	HIST2H2AC	1853333	1851443	9606.ENSP00000348706	9606.ENSP00000332194	0	0	0	0	0	0.251	0.8	0.57	0.93
REL	TP53	1847519	1846083	9606.ENSP00000295025	9606.ENSP00000269305	0	0	0	0	0	0	0	0.929	0.93
RUVBL2	NOP56	1864926	1857348	9606.ENSP00000473172	9606.ENSP00000370589	0	0	0	0	0	0.824	0	0.62	0.93
H2AFY2	HIST1H2BK	1855864	1853439	9606.ENSP00000362352	9606.ENSP00000349430	0	0	0	0	0	0.251	0.8	0.575	0.93
HIST3H2BB	H2AFJ	1857956	1857794	9606.ENSP00000375736	9606.ENSP00000373730	0	0	0	0	0	0.251	0.8	0.573	0.93
CTDP1	SSRP1	1848076	1846565	9606.ENSP00000299543	9606.ENSP00000278412	0	0	0	0	0	0	0.9	0.332	0.93
HIST1H2BL	H2AFY2	1856676	1855864	9606.ENSP00000366618	9606.ENSP00000362352	0	0	0	0	0	0.251	0.8	0.565	0.929
GATA3	IKZF1	1857010	1851367	9606.ENSP00000368632	9606.ENSP00000331614	0	0	0	0	0	0.102	0	0.924	0.929
NPM1	RANBP2	1847808	1846837	9606.ENSP00000296930	9606.ENSP00000283195	0	0	0	0	0	0	0.9	0.325	0.929
RUVBL2	MEAF6	1864926	1855823	9606.ENSP00000473172	9606.ENSP00000362166	0	0	0	0	0	0	0.9	0.321	0.929
H2AFX	HIST1H2BH	1856252	1853333	9606.ENSP00000364310	9606.ENSP00000348706	0	0	0	0	0	0.251	0.8	0.569	0.929
H2AFY	HIST1H2BJ	1861595	1852636	9606.ENSP00000423563	9606.ENSP00000342886	0	0	0	0	0	0.251	0.8	0.569	0.929
CDK1	CDK2	1858283	1845906	9606.ENSP00000378699	9606.ENSP00000266970	0	0	0	0.975	0	0.309	0.9	0.988	0.929
HIST1H2BM	HIST2H2AC	1853848	1851443	9606.ENSP00000352442	9606.ENSP00000332194	0	0	0	0	0	0.251	0.8	0.568	0.929
H2AFY2	HIST1H2BD	1855864	1847163	9606.ENSP00000362352	9606.ENSP00000289316	0	0	0	0	0	0.251	0.8	0.569	0.929
HMGB1	IRF1	1852653	1843757	9606.ENSP00000343040	9606.ENSP00000245414	0	0	0	0	0	0	0.9	0.324	0.929
SENP3	TP53	1860430	1846083	9606.ENSP00000403712	9606.ENSP00000269305	0	0	0	0	0	0.57	0	0.841	0.929
ITGB3	LRP1	1845040	1843653	9606.ENSP00000262017	9606.ENSP00000243077	0	0	0	0	0	0.089	0.9	0.284	0.929
THRA	EP300	1845577	1845316	9606.ENSP00000264637	9606.ENSP00000263253	0	0	0	0	0	0.576	0.8	0.237	0.929
H2AFY	HIST1H2BN	1861595	1858441	9606.ENSP00000423563	9606.ENSP00000380177	0	0	0	0	0	0.251	0.8	0.565	0.929
SMC2	CCNB1	1847012	1844435	9606.ENSP00000286398	9606.ENSP00000256442	0	0	0	0	0	0	0.9	0.321	0.929
H2AFJ	HIST1H2BK	1857794	1853439	9606.ENSP00000373730	9606.ENSP00000349430	0	0	0	0	0	0.251	0.8	0.564	0.929
H2AFY	HIST1H2BL	1861595	1856676	9606.ENSP00000423563	9606.ENSP00000366618	0	0	0	0	0	0.251	0.8	0.565	0.929
POLR2B	GTF2H1	1849572	1845828	9606.ENSP00000312735	9606.ENSP00000265963	0	0	0	0	0	0	0.9	0.325	0.929
MTA3	KAT2B	1859013	1845408	9606.ENSP00000385045	9606.ENSP00000263754	0	0	0	0	0	0	0.9	0.324	0.929
HIST1H2AD	HIST1H2BD	1852412	1847163	9606.ENSP00000341094	9606.ENSP00000289316	0	0	0	0	0	0.251	0.8	0.565	0.929
BRCA1	SMC3	1861387	1854200	9606.ENSP00000418960	9606.ENSP00000354720	0	0	0	0	0	0	0.9	0.324	0.929
HIST1H2BN	H2AFY2	1858441	1855864	9606.ENSP00000380177	9606.ENSP00000362352	0	0	0	0	0	0.251	0.8	0.565	0.929
H2AFJ	HIST1H2BB	1857794	1853610	9606.ENSP00000373730	9606.ENSP00000350580	0	0	0	0	0	0.251	0.8	0.57	0.929
HIST1H2BH	HIST1H2AC	1853333	1850346	9606.ENSP00000348706	9606.ENSP00000321389	0	0	0	0	0	0.251	0.8	0.564	0.929
CDK2	ORC4	1845906	1845494	9606.ENSP00000266970	9606.ENSP00000264169	0	0	0	0	0	0	0.9	0.32	0.929
H2AFY2	HIST1H2BO	1855864	1848526	9606.ENSP00000362352	9606.ENSP00000303408	0	0	0	0	0	0.251	0.8	0.565	0.929
GRIN2A	LRP1	1851485	1843653	9606.ENSP00000332549	9606.ENSP00000243077	0	0	0	0	0	0.564	0	0.844	0.929
H2AFY	HIST1H2BD	1861595	1847163	9606.ENSP00000423563	9606.ENSP00000289316	0	0	0	0	0	0.251	0.8	0.565	0.929
TAF8	TAF6L	1855796	1847468	9606.ENSP00000362068	9606.ENSP00000294168	0	0	0	0	0	0.824	0	0.613	0.929
HIST1H2AJ	HIST1H2BD	1851044	1847163	9606.ENSP00000328484	9606.ENSP00000289316	0	0	0	0	0	0.251	0.8	0.564	0.928
MYC	DDX18	1856789	1845312	9606.ENSP00000367207	9606.ENSP00000263239	0	0	0	0	0	0	0.9	0.313	0.928
HDAC1	JUN	1855935	1855436	9606.ENSP00000362649	9606.ENSP00000360266	0	0	0	0	0	0.811	0	0.634	0.928
HIST1H2BI	HIST1H2AH	1856742	1856690	9606.ENSP00000366962	9606.ENSP00000366679	0	0	0	0	0	0.251	0.8	0.564	0.928
SIN3A	MNT	1854005	1842321	9606.ENSP00000353622	9606.ENSP00000174618	0	0	0	0	0	0.567	0	0.842	0.928
HIST3H2A	HIST1H2BA	1854432	1846410	9606.ENSP00000355656	9606.ENSP00000274764	0	0	0	0	0	0.251	0.8	0.564	0.928
MYC	EGR1	1856789	1843543	9606.ENSP00000367207	9606.ENSP00000239938	0	0	0	0	0	0	0	0.928	0.928
DHX9	HNRNPL	1854615	1842831	9606.ENSP00000356520	9606.ENSP00000221419	0	0	0	0	0	0	0.9	0.312	0.928
HIST1H2BH	HIST1H2AA	1853333	1847815	9606.ENSP00000348706	9606.ENSP00000297012	0	0	0	0	0	0.251	0.8	0.564	0.928
MAX	TP53	1853721	1846083	9606.ENSP00000351490	9606.ENSP00000269305	0	0	0	0	0	0	0.9	0.31	0.928
HIST1H2BK	HIST1H2AJ	1853439	1851044	9606.ENSP00000349430	9606.ENSP00000328484	0	0	0	0	0	0.251	0.8	0.564	0.928
H2AFX	SMARCA2	1856252	1845805	9606.ENSP00000364310	9606.ENSP00000265773	0	0	0	0	0	0.874	0	0.452	0.928
HIST3H2A	HIST1H2BH	1854432	1853333	9606.ENSP00000355656	9606.ENSP00000348706	0	0	0	0	0	0.251	0.8	0.564	0.928
H2AFJ	HIST1H2BH	1857794	1853333	9606.ENSP00000373730	9606.ENSP00000348706	0	0	0	0	0	0.251	0.8	0.564	0.928
MTA3	MTA1	1859013	1851603	9606.ENSP00000385045	9606.ENSP00000333633	0	0	0	0.981	0	0.299	0.9	0.835	0.928
HIST3H2BB	HIST1H2AD	1857956	1852412	9606.ENSP00000375736	9606.ENSP00000341094	0	0	0	0	0	0.251	0.8	0.564	0.928
GTF2H3	CCNT1	1862288	1845024	9606.ENSP00000445162	9606.ENSP00000261900	0	0	0	0	0	0.319	0.9	0	0.928
HIST1H2BN	HIST1H2AH	1858441	1856690	9606.ENSP00000380177	9606.ENSP00000366679	0	0	0	0	0	0.251	0.8	0.564	0.928
HIST3H2A	HIST1H2BD	1854432	1847163	9606.ENSP00000355656	9606.ENSP00000289316	0	0	0	0	0	0.251	0.8	0.564	0.928
HIST1H2AJ	HIST1H2BA	1851044	1846410	9606.ENSP00000328484	9606.ENSP00000274764	0	0	0	0	0	0.251	0.8	0.564	0.928
NUP153	IPO5	1845057	1844939	9606.ENSP00000262077	9606.ENSP00000261574	0	0	0	0	0	0.849	0	0.547	0.928
HIST1H2AH	HIST1H2BD	1856690	1847163	9606.ENSP00000366679	9606.ENSP00000289316	0	0	0	0	0	0.251	0.8	0.564	0.928
HIST1H2BL	HIST3H2A	1856676	1854432	9606.ENSP00000366618	9606.ENSP00000355656	0	0	0	0	0	0.251	0.8	0.564	0.928
H2AFX	HIST1H2BD	1856252	1847163	9606.ENSP00000364310	9606.ENSP00000289316	0	0	0	0	0	0.251	0.8	0.564	0.928
HIST3H2BB	HIST1H2AJ	1857956	1851044	9606.ENSP00000375736	9606.ENSP00000328484	0	0	0	0	0	0.251	0.8	0.564	0.928
H2AFJ	HIST1H2BA	1857794	1846410	9606.ENSP00000373730	9606.ENSP00000274764	0	0	0	0	0	0.251	0.8	0.564	0.928
H2AFJ	HIST1H2BD	1857794	1847163	9606.ENSP00000373730	9606.ENSP00000289316	0	0	0	0	0	0.251	0.8	0.564	0.928
NOP2	PES1	1858730	1853086	9606.ENSP00000382392	9606.ENSP00000346725	0	0	0	0	0	0.89	0	0.378	0.928
HIST1H2BI	HIST3H2A	1856742	1854432	9606.ENSP00000366962	9606.ENSP00000355656	0	0	0	0	0	0.251	0.8	0.564	0.928
TOP2A	PDS5A	1860923	1848529	9606.ENSP00000411532	9606.ENSP00000303427	0	0	0	0	0	0.883	0	0.411	0.928
HDAC2	ERCC2	1861837	1857962	9606.ENSP00000430432	9606.ENSP00000375809	0	0	0	0	0	0	0.9	0.313	0.928
HIST1H2AH	HIST1H2BL	1856690	1856676	9606.ENSP00000366679	9606.ENSP00000366618	0	0	0	0	0	0.251	0.8	0.564	0.928
HIST1H2BL	HIST1H2AJ	1856676	1851044	9606.ENSP00000366618	9606.ENSP00000328484	0	0	0	0	0	0.251	0.8	0.564	0.928
HIST1H2AH	HIST1H2BO	1856690	1848526	9606.ENSP00000366679	9606.ENSP00000303408	0	0	0	0	0	0.251	0.8	0.564	0.928
HDAC2	MNAT1	1861837	1844871	9606.ENSP00000430432	9606.ENSP00000261245	0	0	0	0	0	0	0.9	0.319	0.928
H2AFX	SMC3	1856252	1854200	9606.ENSP00000364310	9606.ENSP00000354720	0	0	0	0	0	0.103	0.9	0.271	0.928
HIST1H2BN	H2AFX	1858441	1856252	9606.ENSP00000380177	9606.ENSP00000364310	0	0	0	0	0	0.251	0.8	0.564	0.928
HIST1H2BI	HIST1H2AJ	1856742	1851044	9606.ENSP00000366962	9606.ENSP00000328484	0	0	0	0	0	0.251	0.8	0.564	0.928
HDAC1	RANGAP1	1855935	1853317	9606.ENSP00000362649	9606.ENSP00000348577	0	0	0	0	0	0	0.9	0.31	0.928
H2AFJ	HIST1H2BL	1857794	1856676	9606.ENSP00000373730	9606.ENSP00000366618	0	0	0	0	0	0.251	0.8	0.564	0.928
HIST1H2BL	HIST1H2AA	1856676	1847815	9606.ENSP00000366618	9606.ENSP00000297012	0	0	0	0	0	0.251	0.8	0.564	0.928
SMARCA4	TAF1	1853627	1846471	9606.ENSP00000350720	9606.ENSP00000276072	0	0	0	0	0	0.778	0	0.693	0.928
HIST1H2AH	HIST1H2BA	1856690	1846410	9606.ENSP00000366679	9606.ENSP00000274764	0	0	0	0	0	0.251	0.8	0.564	0.928
HIST1H2BN	H2AFJ	1858441	1857794	9606.ENSP00000380177	9606.ENSP00000373730	0	0	0	0	0	0.251	0.8	0.564	0.928
NUMA1	KPNB1	1858116	1847208	9606.ENSP00000377298	9606.ENSP00000290158	0	0	0	0	0	0	0.9	0.313	0.928
HIST1H2AH	HIST1H2BH	1856690	1853333	9606.ENSP00000366679	9606.ENSP00000348706	0	0	0	0	0	0.251	0.8	0.564	0.928
PPP1CC	BIRC5	1851808	1848314	9606.ENSP00000335084	9606.ENSP00000301633	0	0	0	0	0	0.219	0.9	0.163	0.928
HIST1H2AA	HIST1H2BD	1847815	1847163	9606.ENSP00000297012	9606.ENSP00000289316	0	0	0	0	0	0.251	0.8	0.564	0.928
HIST1H2BI	HIST1H2AA	1856742	1847815	9606.ENSP00000366962	9606.ENSP00000297012	0	0	0	0	0	0.251	0.8	0.564	0.928
HIST3H2A	HIST1H2BO	1854432	1848526	9606.ENSP00000355656	9606.ENSP00000303408	0	0	0	0	0	0.251	0.8	0.564	0.928
HIST1H2BN	HIST1H2AJ	1858441	1851044	9606.ENSP00000380177	9606.ENSP00000328484	0	0	0	0	0	0.251	0.8	0.564	0.928
TAF2	TRRAP	1856824	1853208	9606.ENSP00000367406	9606.ENSP00000347733	0	0	0	0	0	0	0.9	0.317	0.928
XPO1	SMC3	1858987	1854200	9606.ENSP00000384863	9606.ENSP00000354720	0	0	0	0	0	0.292	0.9	0.065	0.928
HIST1H2BN	HIST3H2A	1858441	1854432	9606.ENSP00000380177	9606.ENSP00000355656	0	0	0	0	0	0.251	0.8	0.564	0.928
HIST1H2BO	HIST1H2AA	1848526	1847815	9606.ENSP00000303408	9606.ENSP00000297012	0	0	0	0	0	0.251	0.8	0.564	0.928
HIST1H2AJ	HIST1H2BO	1851044	1848526	9606.ENSP00000328484	9606.ENSP00000303408	0	0	0	0	0	0.251	0.8	0.564	0.928
THRA	CREBBP	1845577	1845124	9606.ENSP00000264637	9606.ENSP00000262367	0	0	0	0	0	0.566	0.8	0.227	0.927
MYC	ITGB1	1856789	1848520	9606.ENSP00000367207	9606.ENSP00000303351	0	0	0	0	0	0	0.9	0.3	0.927
ACTL6A	TP53	1860014	1846083	9606.ENSP00000397552	9606.ENSP00000269305	0	0	0	0	0	0.576	0	0.835	0.927
ALYREF	PCBP1	1861534	1848744	9606.ENSP00000421592	9606.ENSP00000305556	0	0	0	0	0	0.149	0.9	0.212	0.927
RUVBL1	PABPC1	1850035	1849591	9606.ENSP00000318297	9606.ENSP00000313007	0	0	0	0	0	0.923	0	0.092	0.927
TAF6	TAF6L	1860193	1847468	9606.ENSP00000399982	9606.ENSP00000294168	0	0	0	0.673	0	0	0.9	0.86	0.927
POLR2B	TAF10	1849572	1848061	9606.ENSP00000312735	9606.ENSP00000299424	0	0	0	0	0	0.301	0.9	0	0.927
PSMB6	CDK2	1846162	1845906	9606.ENSP00000270586	9606.ENSP00000266970	0	0	0	0	0	0.309	0.9	0	0.927
KAT5	KAT2A	1852315	1843061	9606.ENSP00000340330	9606.ENSP00000225916	0	0	0	0	0	0.506	0	0.859	0.927
ERCC3	TAF1	1846961	1846471	9606.ENSP00000285398	9606.ENSP00000276072	0	0	0	0	0	0	0.9	0.302	0.927
COBRA1	CCNT1	1852223	1845024	9606.ENSP00000339495	9606.ENSP00000261900	0	0	0	0	0	0	0.9	0.303	0.927
RELA	SMARCA4	1858923	1853627	9606.ENSP00000384273	9606.ENSP00000350720	0	0	0	0	0	0.11	0.9	0.251	0.927
HDAC2	ERCC3	1861837	1846961	9606.ENSP00000430432	9606.ENSP00000285398	0	0	0	0	0	0	0.9	0.301	0.927
NFATC2	IKZF1	1858353	1851367	9606.ENSP00000379330	9606.ENSP00000331614	0	0	0	0	0	0	0.9	0.305	0.927
HNRNPL	APEX1	1842831	1842615	9606.ENSP00000221419	9606.ENSP00000216714	0	0	0	0	0	0.576	0	0.835	0.927
DHX9	SF3B3	1854615	1848773	9606.ENSP00000356520	9606.ENSP00000305790	0	0	0	0	0	0.234	0.9	0.13	0.927
PCBP2	HNRNPH1	1853847	1853404	9606.ENSP00000352438	9606.ENSP00000349168	0	0	0	0	0	0	0.9	0.305	0.927
YBX1	HNRNPH1	1855704	1853404	9606.ENSP00000361626	9606.ENSP00000349168	0	0	0	0	0	0	0.9	0.305	0.927
KPNA2	TP53	1851476	1846083	9606.ENSP00000332455	9606.ENSP00000269305	0	0	0	0	0	0.576	0	0.835	0.927
CDK1	MNAT1	1858283	1844871	9606.ENSP00000378699	9606.ENSP00000261245	0	0	0	0	0	0	0.9	0.3	0.927
TP53	THBS1	1846083	1844779	9606.ENSP00000269305	9606.ENSP00000260356	0	0	0	0	0	0	0	0.927	0.927
POLR2A	SMARCC2	1849743	1845915	9606.ENSP00000314949	9606.ENSP00000267064	0	0	0	0	0	0.111	0.9	0.243	0.926
RUVBL1	TUBA1A	1850035	1848244	9606.ENSP00000318297	9606.ENSP00000301071	0	0	0	0	0	0.923	0	0.081	0.926
CSNK2A2	SIRT1	1845161	1842473	9606.ENSP00000262506	9606.ENSP00000212015	0	0	0	0	0	0.623	0	0.812	0.926
HNRNPH1	SF3B1	1853404	1851836	9606.ENSP00000349168	9606.ENSP00000335321	0	0	0	0	0	0	0.9	0.291	0.926
XPO1	PLK1	1858987	1848135	9606.ENSP00000384863	9606.ENSP00000300093	0	0	0	0	0	0	0.9	0.293	0.926
GNB2L1	GRB2	1861691	1852164	9606.ENSP00000426909	9606.ENSP00000339007	0	0	0	0	0	0	0.9	0.291	0.926
PHB2	PHB	1862194	1848178	9606.ENSP00000441875	9606.ENSP00000300408	0	0	0	0.949	0	0.923	0	0.956	0.926
ZBTB7A	TP53	1850567	1846083	9606.ENSP00000323670	9606.ENSP00000269305	0	0	0	0	0	0.57	0	0.836	0.926
RBBP7	UBTF	1857150	1848435	9606.ENSP00000369424	9606.ENSP00000302640	0	0	0	0	0	0	0.9	0.292	0.926
ERCC3	GTF2H4	1846961	1844735	9606.ENSP00000285398	9606.ENSP00000259895	0	0	0	0	0	0.668	0	0.786	0.926
HNRNPD	KAT2B	1849608	1845408	9606.ENSP00000313199	9606.ENSP00000263754	0	0	0	0	0	0.576	0	0.832	0.926
RANGAP1	PLK1	1853317	1848135	9606.ENSP00000348577	9606.ENSP00000300093	0	0	0	0	0	0	0.9	0.283	0.925
KAT5	CCNB1	1852315	1844435	9606.ENSP00000340330	9606.ENSP00000256442	0	0	0	0	0	0.576	0	0.831	0.925
KPNA5	NUP153	1853332	1845057	9606.ENSP00000348704	9606.ENSP00000262077	0	0	0	0	0	0.507	0	0.854	0.925
COBRA1	CTDP1	1852223	1848076	9606.ENSP00000339495	9606.ENSP00000299543	0	0	0	0	0	0	0.9	0.282	0.925
SMARCA4	HIST1H3A	1853627	1853568	9606.ENSP00000350720	9606.ENSP00000350275	0	0	0	0	0	0.889	0	0.357	0.925
CDK9	MDFIC	1855868	1844531	9606.ENSP00000362361	9606.ENSP00000257724	0	0	0	0	0	0.564	0	0.836	0.925
ALYREF	SARNP	1861534	1852022	9606.ENSP00000421592	9606.ENSP00000337632	0	0	0	0	0	0	0.9	0.283	0.925
XPO1	NFKBIA	1858987	1842621	9606.ENSP00000384863	9606.ENSP00000216797	0	0	0	0	0	0.102	0.9	0.226	0.924
NCAPD2	C1QBP	1850703	1843043	9606.ENSP00000325017	9606.ENSP00000225698	0	0	0	0	0	0.924	0	0	0.924
CDK1	ORC5	1858283	1847866	9606.ENSP00000378699	9606.ENSP00000297431	0	0	0	0	0	0	0.9	0.28	0.924
TAF1	MNAT1	1846471	1844871	9606.ENSP00000276072	9606.ENSP00000261245	0	0	0	0	0	0.275	0.9	0	0.924
HMGB1	NFKBIA	1852653	1842621	9606.ENSP00000343040	9606.ENSP00000216797	0	0	0	0	0	0.083	0.9	0.243	0.924
DHX9	SF3B1	1854615	1851836	9606.ENSP00000356520	9606.ENSP00000335321	0	0	0	0	0	0.234	0.9	0.089	0.924
RAPGEF4	RAF1	1858455	1844086	9606.ENSP00000380271	9606.ENSP00000251849	0	0	0	0	0	0	0.9	0.28	0.924
CREB1	PPP1CA	1859295	1850792	9606.ENSP00000387699	9606.ENSP00000326031	0	0	0	0	0	0.566	0.8	0.198	0.924
ILF3	YY1	1860459	1845097	9606.ENSP00000404121	9606.ENSP00000262238	0	0	0	0	0	0.576	0	0.829	0.924
TAF6	CHD8	1860193	1858781	9606.ENSP00000399982	9606.ENSP00000382863	0	0	0	0	0	0.232	0.9	0.09	0.924
SP1	NFKBIA	1851138	1842621	9606.ENSP00000329357	9606.ENSP00000216797	0	0	0	0	0	0.091	0.9	0.232	0.924
ANAPC7	CDK1	1859796	1858283	9606.ENSP00000394394	9606.ENSP00000378699	0	0	0	0	0	0	0.9	0.271	0.924
HDAC2	HIST1H2BJ	1861837	1852636	9606.ENSP00000430432	9606.ENSP00000342886	0	0	0	0	0	0.441	0.8	0.37	0.923
HDAC1	HIST1H2BM	1855935	1853848	9606.ENSP00000362649	9606.ENSP00000352442	0	0	0	0	0	0.441	0.8	0.37	0.923
CDK9	CDK7	1855868	1844436	9606.ENSP00000362361	9606.ENSP00000256443	0	0	0	0.869	0	0.159	0.9	0.989	0.923
HDAC1	HIST1H2BJ	1855935	1852636	9606.ENSP00000362649	9606.ENSP00000342886	0	0	0	0	0	0.441	0.8	0.372	0.923
PDS5B	NUP85	1849657	1843765	9606.ENSP00000313851	9606.ENSP00000245544	0	0	0	0	0	0	0.9	0.269	0.923
XRCC5	RBM14	1857983	1849459	9606.ENSP00000375977	9606.ENSP00000311747	0	0	0	0	0	0.566	0	0.831	0.923
MNAT1	CCNB1	1844871	1844435	9606.ENSP00000261245	9606.ENSP00000256442	0	0	0	0	0	0	0.9	0.263	0.923
TAF6	GTF2H1	1860193	1845828	9606.ENSP00000399982	9606.ENSP00000265963	0	0	0	0	0	0	0.9	0.266	0.923
APP	NFKB1	1846936	1843094	9606.ENSP00000284981	9606.ENSP00000226574	0	0	0	0	0	0	0.9	0.27	0.923
MLL	SMARCB1	1862045	1845291	9606.ENSP00000436786	9606.ENSP00000263121	0	0	0	0	0	0.283	0	0.897	0.923
SMARCA4	MBD3	1853627	1842265	9606.ENSP00000350720	9606.ENSP00000156825	0	0	0	0	0	0.576	0	0.826	0.923
TAF10	GTF2H1	1848061	1845828	9606.ENSP00000299424	9606.ENSP00000265963	0	0	0	0	0	0	0.9	0.27	0.923
HDAC2	HIST1H2BM	1861837	1853848	9606.ENSP00000430432	9606.ENSP00000352442	0	0	0	0	0	0.441	0.8	0.37	0.923
YBX1	HNRNPF	1855704	1852109	9606.ENSP00000361626	9606.ENSP00000338477	0	0	0	0	0	0	0.9	0.267	0.923
PABPC1	EIF3E	1849591	1842805	9606.ENSP00000313007	9606.ENSP00000220849	0	0	0	0	0	0	0.9	0.266	0.923
H2AFX	TP53	1856252	1846083	9606.ENSP00000364310	9606.ENSP00000269305	0	0	0	0	0	0.576	0	0.826	0.923
PCBP2	PCBP1	1853847	1848744	9606.ENSP00000352438	9606.ENSP00000305556	0	0	0	0.985	0	0.255	0.9	0.812	0.923
BIRC5	CDK2	1848314	1845906	9606.ENSP00000301633	9606.ENSP00000266970	0	0	0	0	0	0.576	0	0.827	0.923
GRB2	ITGB1	1852164	1848520	9606.ENSP00000339007	9606.ENSP00000303351	0	0	0	0	0	0	0.9	0.262	0.923
BIRC5	NUP85	1848314	1843765	9606.ENSP00000301633	9606.ENSP00000245544	0	0	0	0	0	0	0.9	0.27	0.923
ALYREF	HNRNPK	1861534	1856467	9606.ENSP00000421592	9606.ENSP00000365439	0	0	0	0	0	0	0.9	0.264	0.923
GATA3	RUNX1	1857010	1848173	9606.ENSP00000368632	9606.ENSP00000300305	0	0	0	0	0	0.074	0	0.92	0.923
TAF5	CCNH	1855115	1844473	9606.ENSP00000358854	9606.ENSP00000256897	0	0	0	0	0	0	0.9	0.261	0.923
KAT5	NCL	1852315	1850027	9606.ENSP00000340330	9606.ENSP00000318195	0	0	0	0	0	0	0.9	0.265	0.923
TAF6	POLR2A	1860193	1849743	9606.ENSP00000399982	9606.ENSP00000314949	0	0	0	0	0	0	0.9	0.257	0.922
POU2F1	XRCC6	1854675	1853821	9606.ENSP00000356840	9606.ENSP00000352257	0	0	0	0	0	0.913	0	0.138	0.922
H2AFB3	H3F3A	1855022	1854454	9606.ENSP00000358452	9606.ENSP00000355778	0	0	0	0	0	0.243	0.72	0.663	0.922
MTA1	UBTF	1851603	1848435	9606.ENSP00000333633	9606.ENSP00000302640	0	0	0	0	0	0	0.9	0.259	0.922
UBTF	MTA2	1848435	1846587	9606.ENSP00000302640	9606.ENSP00000278823	0	0	0	0	0	0	0.9	0.253	0.922
EIF2AK2	NFKBIA	1843335	1842621	9606.ENSP00000233057	9606.ENSP00000216797	0	0	0	0	0	0.576	0.8	0.159	0.922
TAF6	ERCC3	1860193	1846961	9606.ENSP00000399982	9606.ENSP00000285398	0	0	0	0	0	0	0.9	0.258	0.922
SDC4	SDC1	1855743	1844292	9606.ENSP00000361818	9606.ENSP00000254351	0	0	0	0.725	0	0	0.9	0.824	0.922
H2AFX	LMNB1	1856252	1844893	9606.ENSP00000364310	9606.ENSP00000261366	0	0	0	0	0	0	0.9	0.255	0.922
SETD7	KAT2B	1846356	1845408	9606.ENSP00000274031	9606.ENSP00000263754	0	0	0	0	0	0.126	0	0.914	0.922
SF3B3	HNRNPU	1848773	1846836	9606.ENSP00000305790	9606.ENSP00000283179	0	0	0	0	0	0	0.9	0.253	0.922
RECQL	XRCC5	1859865	1857983	9606.ENSP00000395449	9606.ENSP00000375977	0	0	0	0	0	0.848	0	0.508	0.922
MTA3	UBTF	1859013	1848435	9606.ENSP00000385045	9606.ENSP00000302640	0	0	0	0	0	0	0.9	0.259	0.922
AHCTF1	RANGAP1	1854384	1853317	9606.ENSP00000355465	9606.ENSP00000348577	0	0	0	0	0	0	0.9	0.255	0.922
JUN	SMARCC2	1855436	1845915	9606.ENSP00000360266	9606.ENSP00000267064	0	0	0	0	0	0	0.9	0.26	0.922
TAF8	TAF3	1855796	1852303	9606.ENSP00000362068	9606.ENSP00000340271	0	0	0	0.634	0	0	0.9	0.637	0.922
HDAC2	SIRT1	1861837	1842473	9606.ENSP00000430432	9606.ENSP00000212015	0	0	0	0	0	0.574	0	0.826	0.922
MTA2	KAT2B	1846587	1845408	9606.ENSP00000278823	9606.ENSP00000263754	0	0	0	0	0	0	0.9	0.243	0.921
CTDP1	MNAT1	1848076	1844871	9606.ENSP00000299543	9606.ENSP00000261245	0	0	0	0	0	0	0.9	0.249	0.921
HNRNPF	SF3B1	1852109	1851836	9606.ENSP00000338477	9606.ENSP00000335321	0	0	0	0	0	0	0.9	0.243	0.921
ALYREF	RANBP2	1861534	1846837	9606.ENSP00000421592	9606.ENSP00000283195	0	0	0	0	0	0.153	0.9	0.152	0.921
RBBP4	HIST3H3	1855919	1854433	9606.ENSP00000362592	9606.ENSP00000355657	0	0	0	0	0	0.868	0	0.425	0.921
USF1	TBP	1854711	1843249	9606.ENSP00000356999	9606.ENSP00000230354	0	0	0	0	0	0	0	0.921	0.921
PPP1CC	CTDNEP1	1851808	1850381	9606.ENSP00000335084	9606.ENSP00000321732	0	0	0	0	0	0	0.9	0.244	0.921
HIST3H3	CDK2	1854433	1845906	9606.ENSP00000355657	9606.ENSP00000266970	0	0	0	0	0	0.101	0.9	0.199	0.921
MYC	CSNK2A2	1856789	1845161	9606.ENSP00000367207	9606.ENSP00000262506	0	0	0	0	0	0.576	0	0.818	0.92
RUVBL1	H2AFV	1850035	1849067	9606.ENSP00000318297	9606.ENSP00000308405	0	0	0	0	0	0.827	0	0.559	0.92
PCBP2	HNRNPF	1853847	1852109	9606.ENSP00000352438	9606.ENSP00000338477	0	0	0	0	0	0	0.9	0.235	0.92
TH1L	CCNT1	1852578	1845024	9606.ENSP00000342300	9606.ENSP00000261900	0	0	0	0	0	0	0.9	0.234	0.92
DHX9	HNRNPH1	1854615	1853404	9606.ENSP00000356520	9606.ENSP00000349168	0	0	0	0	0	0	0.9	0.242	0.92
GTF2H1	TAF12	1845828	1845448	9606.ENSP00000265963	9606.ENSP00000263974	0	0	0	0	0	0	0.9	0.242	0.92
SNW1	SIRT1	1844933	1842473	9606.ENSP00000261531	9606.ENSP00000212015	0	0	0	0	0	0.564	0	0.825	0.92
ETS1	NFKB1	1858032	1843094	9606.ENSP00000376436	9606.ENSP00000226574	0	0	0	0	0	0.864	0	0.429	0.92
PHB2	HDAC1	1862194	1855935	9606.ENSP00000441875	9606.ENSP00000362649	0	0	0	0	0	0.913	0	0.118	0.92
YBX1	HNRNPM	1855704	1850730	9606.ENSP00000361626	9606.ENSP00000325376	0	0	0	0	0	0	0.9	0.233	0.92
KHDRBS1	CREBBP	1849655	1845124	9606.ENSP00000313829	9606.ENSP00000262367	0	0	0	0	0	0.915	0	0.101	0.92
NUMA1	SMC3	1858116	1854200	9606.ENSP00000377298	9606.ENSP00000354720	0	0	0	0	0	0.57	0	0.823	0.92
NCAPD2	CCNB1	1850703	1844435	9606.ENSP00000325017	9606.ENSP00000256442	0	0	0	0	0	0	0.9	0.232	0.92
CDK9	MNAT1	1855868	1844871	9606.ENSP00000362361	9606.ENSP00000261245	0	0	0	0	0	0	0.9	0.234	0.92
JUN	CDK2	1855436	1845906	9606.ENSP00000360266	9606.ENSP00000266970	0	0	0	0	0	0.337	0	0.882	0.919
DPF2	SMARCA4	1862050	1853627	9606.ENSP00000436901	9606.ENSP00000350720	0	0	0	0	0	0.891	0	0.29	0.919
PHKG2	CCNT1	1862976	1845024	9606.ENSP00000455607	9606.ENSP00000261900	0	0	0	0	0	0	0.9	0.223	0.919
H2AFB3	H3F3B	1855022	1844327	9606.ENSP00000358452	9606.ENSP00000254810	0	0	0	0	0	0.243	0.72	0.652	0.919
ALYREF	PCBP2	1861534	1853847	9606.ENSP00000421592	9606.ENSP00000352438	0	0	0	0	0	0.149	0.9	0.129	0.919
DHX9	ILF2	1854615	1854278	9606.ENSP00000356520	9606.ENSP00000355011	0	0	0	0	0	0.854	0	0.47	0.919
TP53	MNAT1	1846083	1844871	9606.ENSP00000269305	9606.ENSP00000261245	0	0	0	0	0	0.576	0	0.818	0.919
ALYREF	PRPF8	1861534	1848629	9606.ENSP00000421592	9606.ENSP00000304350	0	0	0	0	0	0	0.9	0.224	0.919
PSIP1	SP1	1857276	1851138	9606.ENSP00000370109	9606.ENSP00000329357	0	0	0	0	0	0.564	0	0.822	0.919
HMGB1	ITGAV	1852653	1844842	9606.ENSP00000343040	9606.ENSP00000261023	0	0	0	0	0	0	0.9	0.227	0.919
NCL	DGCR8	1850027	1845307	9606.ENSP00000318195	9606.ENSP00000263209	0	0	0	0	0	0.573	0	0.82	0.919
HDAC2	THRA	1861837	1845577	9606.ENSP00000430432	9606.ENSP00000264637	0	0	0	0	0	0.576	0.8	0.13	0.919
RUVBL2	H2AFV	1864926	1849067	9606.ENSP00000473172	9606.ENSP00000308405	0	0	0	0	0	0.824	0	0.56	0.919
PDS5A	NUP85	1848529	1843765	9606.ENSP00000303427	9606.ENSP00000245544	0	0	0	0	0	0	0.9	0.229	0.919
GTF2H2	CCNT1	1846383	1845024	9606.ENSP00000274400	9606.ENSP00000261900	0	0	0	0	0	0.152	0.9	0.124	0.919
SMARCC2	SUPT16H	1845915	1842582	9606.ENSP00000267064	9606.ENSP00000216297	0	0	0	0	0	0.1	0.9	0.162	0.918
CHD8	SUPT16H	1858781	1842582	9606.ENSP00000382863	9606.ENSP00000216297	0	0	0	0	0	0.667	0	0.765	0.918
HNRNPK	EIF3F	1856467	1849251	9606.ENSP00000365439	9606.ENSP00000310040	0	0	0	0	0	0.576	0	0.814	0.918
XRCC5	POU2F1	1857983	1854675	9606.ENSP00000375977	9606.ENSP00000356840	0	0	0	0	0	0.913	0	0.098	0.918
TOP2A	CSNK2A2	1860923	1845161	9606.ENSP00000411532	9606.ENSP00000262506	0	0	0	0	0	0.918	0	0	0.918
CREBBP	SNW1	1845124	1844933	9606.ENSP00000262367	9606.ENSP00000261531	0	0	0	0	0	0	0.9	0.222	0.918
RUVBL1	NCL	1850035	1850027	9606.ENSP00000318297	9606.ENSP00000318195	0	0	0	0	0	0	0.9	0.216	0.918
DHX9	NFKB1	1854615	1843094	9606.ENSP00000356520	9606.ENSP00000226574	0	0	0	0	0	0	0.9	0.216	0.918
HDAC1	AATF	1855935	1843020	9606.ENSP00000362649	9606.ENSP00000225402	0	0	0	0	0	0	0.9	0.222	0.918
GTF2I	YY1	1850459	1845097	9606.ENSP00000322542	9606.ENSP00000262238	0	0	0	0	0	0.576	0	0.814	0.918
CDK2	KAT2B	1845906	1845408	9606.ENSP00000266970	9606.ENSP00000263754	0	0	0	0	0	0.831	0	0.533	0.918
MLL	TAF1	1862045	1846471	9606.ENSP00000436786	9606.ENSP00000276072	0	0	0	0	0	0.126	0.9	0.13	0.917
RELA	APP	1858923	1846936	9606.ENSP00000384273	9606.ENSP00000284981	0	0	0	0	0	0	0.9	0.208	0.917
ITGB3	SDC1	1845040	1844292	9606.ENSP00000262017	9606.ENSP00000254351	0	0	0	0	0	0	0.9	0.211	0.917
CTDP1	SUPT16H	1848076	1842582	9606.ENSP00000299543	9606.ENSP00000216297	0	0	0	0	0	0	0.9	0.212	0.917
CCR2	APP	1847341	1846936	9606.ENSP00000292301	9606.ENSP00000284981	0	0	0	0	0	0	0.9	0.207	0.917
MNAT1	TBP	1844871	1843249	9606.ENSP00000261245	9606.ENSP00000230354	0	0	0	0	0	0	0.9	0.206	0.917
RECQL	TOP1	1859865	1854138	9606.ENSP00000395449	9606.ENSP00000354522	0	0	0	0	0	0.723	0	0.715	0.917
SDC1	LRP1	1844292	1843653	9606.ENSP00000254351	9606.ENSP00000243077	0	0	0	0	0	0	0.9	0.213	0.917
BRCA1	HIST2H2AC	1861387	1851443	9606.ENSP00000418960	9606.ENSP00000332194	0	0	0	0	0	0.81	0	0.583	0.917
HMGB1	ITGB3	1852653	1845040	9606.ENSP00000343040	9606.ENSP00000262017	0	0	0	0	0	0	0.9	0.213	0.917
HDAC2	H2AFX	1861837	1856252	9606.ENSP00000430432	9606.ENSP00000364310	0	0	0	0	0	0.17	0.8	0.545	0.917
HDAC2	CCNH	1861837	1844473	9606.ENSP00000430432	9606.ENSP00000256897	0	0	0	0	0	0	0.9	0.211	0.917
CLOCK	CREBBP	1849105	1845124	9606.ENSP00000308741	9606.ENSP00000262367	0	0	0	0	0	0	0.9	0.207	0.917
ARID1A	CREBBP	1850249	1845124	9606.ENSP00000320485	9606.ENSP00000262367	0	0	0	0	0	0.08	0.9	0.176	0.917
PLK1	RANBP2	1848135	1846837	9606.ENSP00000300093	9606.ENSP00000283195	0	0	0	0	0	0	0.9	0.21	0.917
MYC	TOP1	1856789	1854138	9606.ENSP00000367207	9606.ENSP00000354522	0	0	0	0	0	0.225	0	0.897	0.917
NFKB2	DHX9	1855147	1854615	9606.ENSP00000358983	9606.ENSP00000356520	0	0	0	0	0	0.156	0.9	0.105	0.917
NPM1	KPNB1	1847808	1847208	9606.ENSP00000296930	9606.ENSP00000290158	0	0	0	0	0	0	0.9	0.208	0.917
RBBP4	CCNB1	1855919	1844435	9606.ENSP00000362592	9606.ENSP00000256442	0	0	0	0	0	0	0.9	0.207	0.917
POLR2A	TAF4	1849743	1844180	9606.ENSP00000314949	9606.ENSP00000252996	0	0	0	0	0	0	0.9	0.213	0.917
ITGAV	SDC1	1844842	1844292	9606.ENSP00000261023	9606.ENSP00000254351	0	0	0	0	0	0	0.9	0.212	0.917
POLR2B	PRPF8	1849572	1848629	9606.ENSP00000312735	9606.ENSP00000304350	0	0	0	0	0	0	0.9	0.198	0.916
TAF11	GTF2H1	1854176	1845828	9606.ENSP00000354633	9606.ENSP00000265963	0	0	0	0	0	0	0.9	0.203	0.916
TAF6	POLR2B	1860193	1849572	9606.ENSP00000399982	9606.ENSP00000312735	0	0	0	0	0	0	0.9	0.198	0.916
SIN3A	MAX	1854005	1853721	9606.ENSP00000353622	9606.ENSP00000351490	0	0	0	0	0	0	0.9	0.202	0.916
DHX9	PCBP2	1854615	1853847	9606.ENSP00000356520	9606.ENSP00000352438	0	0	0	0	0	0.073	0.9	0.167	0.916
MAX	GAPDH	1853721	1843185	9606.ENSP00000351490	9606.ENSP00000229239	0	0	0	0	0	0	0.9	0.202	0.916
ERCC2	CHD4	1857962	1853454	9606.ENSP00000375809	9606.ENSP00000349508	0	0	0	0	0	0	0.9	0.198	0.916
RBBP4	H3F3A	1855919	1854454	9606.ENSP00000362592	9606.ENSP00000355778	0	0	0	0	0	0.859	0	0.425	0.916
POLR2B	SSRP1	1849572	1846565	9606.ENSP00000312735	9606.ENSP00000278412	0	0	0	0	0	0	0.9	0.199	0.916
ZAP70	CD38	1845655	1843082	9606.ENSP00000264972	9606.ENSP00000226279	0	0	0	0	0	0.571	0	0.813	0.916
RBBP4	CBX4	1855919	1846093	9606.ENSP00000362592	9606.ENSP00000269397	0	0	0	0	0	0	0.9	0.201	0.916
NR2F2	KLF5	1858165	1856730	9606.ENSP00000377721	9606.ENSP00000366915	0	0	0	0	0	0.074	0.9	0.168	0.916
CTDP1	GTF2H1	1848076	1845828	9606.ENSP00000299543	9606.ENSP00000265963	0	0	0	0	0	0	0.9	0.198	0.916
ITGB1	BIRC5	1848520	1848314	9606.ENSP00000303351	9606.ENSP00000301633	0	0	0	0	0	0	0.9	0.195	0.916
NUMA1	CCNB1	1858116	1844435	9606.ENSP00000377298	9606.ENSP00000256442	0	0	0	0	0	0	0.9	0.197	0.916
RBBP7	NPM1	1857150	1847808	9606.ENSP00000369424	9606.ENSP00000296930	0	0	0	0	0	0	0.9	0.198	0.916
PABPC1	EIF3K	1849591	1843908	9606.ENSP00000313007	9606.ENSP00000248342	0	0	0	0	0	0	0.9	0.203	0.916
ORC5	CCNB1	1847866	1844435	9606.ENSP00000297431	9606.ENSP00000256442	0	0	0	0	0	0	0.9	0.197	0.916
APP	NFKBIA	1846936	1842621	9606.ENSP00000284981	9606.ENSP00000216797	0	0	0	0	0	0	0.9	0.201	0.916
NCL	CREBBP	1850027	1845124	9606.ENSP00000318195	9606.ENSP00000262367	0	0	0	0	0	0	0.9	0.201	0.916
ANAPC7	PSMA7	1859796	1855365	9606.ENSP00000394394	9606.ENSP00000359910	0	0	0	0	0	0	0.9	0.201	0.916
PSMA7	PABPC1	1855365	1849591	9606.ENSP00000359910	9606.ENSP00000313007	0	0	0	0	0	0	0.9	0.196	0.916
HNRNPH1	SNRNP200	1853404	1849929	9606.ENSP00000349168	9606.ENSP00000317123	0	0	0	0	0	0	0.9	0.187	0.915
H2AFZ	H3F3B	1847723	1844327	9606.ENSP00000296417	9606.ENSP00000254810	0	0	0	0	0	0.667	0	0.756	0.915
MAX	CCNB1	1853721	1844435	9606.ENSP00000351490	9606.ENSP00000256442	0	0	0	0	0	0	0.9	0.191	0.915
TAF1	GTF2H1	1846471	1845828	9606.ENSP00000276072	9606.ENSP00000265963	0	0	0	0	0	0	0.9	0.191	0.915
NUP88	NPM1	1863294	1847808	9606.ENSP00000458954	9606.ENSP00000296930	0	0	0	0	0	0	0.9	0.191	0.915
HIST1H2BK	H3F3B	1853439	1844327	9606.ENSP00000349430	9606.ENSP00000254810	0	0	0	0	0	0.297	0	0.884	0.915
CHD8	TAF9	1858781	1842675	9606.ENSP00000382863	9606.ENSP00000217893	0	0	0	0	0	0.188	0.9	0	0.915
TBP	SIRT1	1843249	1842473	9606.ENSP00000230354	9606.ENSP00000212015	0	0	0	0	0	0	0.9	0.193	0.915
ARID1A	KAT2B	1850249	1845408	9606.ENSP00000320485	9606.ENSP00000263754	0	0	0	0	0	0.08	0.9	0.159	0.915
DHX15	SNW1	1851918	1844933	9606.ENSP00000336741	9606.ENSP00000261531	0	0	0	0	0	0.9	0	0.182	0.915
SF3B3	HNRNPL	1848773	1842831	9606.ENSP00000305790	9606.ENSP00000221419	0	0	0	0	0	0	0.9	0.191	0.915
ALYREF	HNRNPU	1861534	1846836	9606.ENSP00000421592	9606.ENSP00000283179	0	0	0	0	0	0	0.9	0.194	0.915
SAP18	PNN	1857541	1842625	9606.ENSP00000371973	9606.ENSP00000216832	0	0	0	0	0	0.566	0.8	0.103	0.915
WDR5	KAT2B	1853715	1845408	9606.ENSP00000351446	9606.ENSP00000263754	0	0	0	0	0	0.526	0.72	0.416	0.915
CDK1	ORC4	1858283	1845494	9606.ENSP00000378699	9606.ENSP00000264169	0	0	0	0	0	0	0.9	0.192	0.915
YY1	TBP	1845097	1843249	9606.ENSP00000262238	9606.ENSP00000230354	0	0	0	0	0	0.097	0	0.909	0.915
GTF2H3	TAF1	1862288	1846471	9606.ENSP00000445162	9606.ENSP00000276072	0	0	0	0	0	0.082	0.9	0.151	0.915
RUVBL2	NCL	1864926	1850027	9606.ENSP00000473172	9606.ENSP00000318195	0	0	0	0	0	0	0.9	0.186	0.915
SMARCA4	TAF10	1853627	1848061	9606.ENSP00000350720	9606.ENSP00000299424	0	0	0	0	0	0.879	0	0.313	0.914
PABPC1	EIF3F	1849591	1849251	9606.ENSP00000313007	9606.ENSP00000310040	0	0	0	0	0	0	0.9	0.177	0.914
POLR2B	TAF1	1849572	1846471	9606.ENSP00000312735	9606.ENSP00000276072	0	0	0	0	0	0	0.9	0.18	0.914
SDC2	ITGB1	1848909	1848520	9606.ENSP00000307046	9606.ENSP00000303351	0	0	0	0	0	0	0.9	0.178	0.914
TAF6L	TAF4B	1847468	1846067	9606.ENSP00000294168	9606.ENSP00000269142	0	0	0	0	0	0.722	0	0.704	0.914
TOP2A	PDS5B	1860923	1849657	9606.ENSP00000411532	9606.ENSP00000313851	0	0	0	0	0	0.883	0	0.295	0.914
EEF1D	CDK1	1859610	1858283	9606.ENSP00000391944	9606.ENSP00000378699	0	0	0	0	0	0.576	0	0.807	0.914
ERCC2	TAF12	1857962	1845448	9606.ENSP00000375809	9606.ENSP00000263974	0	0	0	0	0	0	0.9	0.182	0.914
GTF2H3	UBTF	1862288	1848435	9606.ENSP00000445162	9606.ENSP00000302640	0	0	0	0	0	0.102	0.9	0.124	0.914
CHD4	ERCC3	1853454	1846961	9606.ENSP00000349508	9606.ENSP00000285398	0	0	0	0	0	0	0.9	0.179	0.914
MAX	RUVBL1	1853721	1850035	9606.ENSP00000351490	9606.ENSP00000318297	0	0	0	0	0	0	0.9	0.18	0.914
ERCC2	CDK9	1857962	1855868	9606.ENSP00000375809	9606.ENSP00000362361	0	0	0	0	0	0	0.9	0.184	0.914
ADAR	IFI6	1854805	1852601	9606.ENSP00000357459	9606.ENSP00000342513	0	0	0	0	0	0	0.9	0.18	0.914
TAF1	CCNH	1846471	1844473	9606.ENSP00000276072	9606.ENSP00000256897	0	0	0	0	0	0.096	0.9	0.126	0.914
ITPK1	SIRT1	1845959	1842473	9606.ENSP00000267615	9606.ENSP00000212015	0	0	0	0	0	0.576	0	0.806	0.914
RAPGEF4	APBB1IP	1858455	1856462	9606.ENSP00000380271	9606.ENSP00000365411	0	0	0	0	0	0	0.9	0.183	0.914
HNRNPF	SNRNP200	1852109	1849929	9606.ENSP00000338477	9606.ENSP00000317123	0	0	0	0	0	0	0.9	0.177	0.914
RBBP7	TBP	1857150	1843249	9606.ENSP00000369424	9606.ENSP00000230354	0	0	0	0	0	0	0.9	0.183	0.914
HDAC1	CCNH	1855935	1844473	9606.ENSP00000362649	9606.ENSP00000256897	0	0	0	0	0	0	0.9	0.18	0.914
RBBP4	PLK1	1855919	1848135	9606.ENSP00000362592	9606.ENSP00000300093	0	0	0	0	0	0	0.9	0.18	0.914
CEBPB	EGR1	1848728	1843543	9606.ENSP00000305422	9606.ENSP00000239938	0	0	0	0	0	0.812	0	0.561	0.914
ERCC3	CCNT1	1846961	1845024	9606.ENSP00000285398	9606.ENSP00000261900	0	0	0	0	0	0	0.9	0.184	0.914
HIST3H2A	H3F3B	1854432	1844327	9606.ENSP00000355656	9606.ENSP00000254810	0	0	0	0	0	0.361	0.72	0.56	0.914
NFKB2	APP	1855147	1846936	9606.ENSP00000358983	9606.ENSP00000284981	0	0	0	0	0	0	0.9	0.178	0.914
PARP1	TOP1	1854450	1854138	9606.ENSP00000355759	9606.ENSP00000354522	0	0	0	0	0	0.77	0	0.637	0.913
NFKB2	HMGB1	1855147	1852653	9606.ENSP00000358983	9606.ENSP00000343040	0	0	0	0	0	0.083	0.9	0.129	0.913
DHX9	PCBP1	1854615	1848744	9606.ENSP00000356520	9606.ENSP00000305556	0	0	0	0	0	0.073	0.9	0.143	0.913
TP53	IRF1	1846083	1843757	9606.ENSP00000269305	9606.ENSP00000245414	0	0	0	0	0	0	0	0.913	0.913
ORC4	CCNB1	1845494	1844435	9606.ENSP00000264169	9606.ENSP00000256442	0	0	0	0	0	0.075	0.9	0.138	0.913
GRIN2B	GRIN2D	1846639	1845322	9606.ENSP00000279593	9606.ENSP00000263269	0	0	0	0.915	0	0.098	0.9	0.913	0.913
GRIN2A	GRIN2C	1851485	1847389	9606.ENSP00000332549	9606.ENSP00000293190	0	0	0	0.934	0	0.119	0.9	0.923	0.913
MAX	TAF1	1853721	1846471	9606.ENSP00000351490	9606.ENSP00000276072	0	0	0	0	0	0.17	0.9	0.047	0.913
RUNX1	TP53	1848173	1846083	9606.ENSP00000300305	9606.ENSP00000269305	0	0	0	0	0	0	0	0.913	0.913
RBBP7	RUVBL1	1857150	1850035	9606.ENSP00000369424	9606.ENSP00000318297	0	0	0	0	0	0	0.9	0.169	0.913
UBTF	ERCC3	1848435	1846961	9606.ENSP00000302640	9606.ENSP00000285398	0	0	0	0	0	0	0.9	0.17	0.913
REL	CCNE1	1847519	1845190	9606.ENSP00000295025	9606.ENSP00000262643	0	0	0	0	0	0.576	0	0.802	0.913
SAP30	SMARCA5	1847743	1846833	9606.ENSP00000296504	9606.ENSP00000283131	0	0	0	0	0	0	0.9	0.17	0.913
RUVBL1	NPM1	1850035	1847808	9606.ENSP00000318297	9606.ENSP00000296930	0	0	0	0	0	0	0.9	0.173	0.913
SMARCA5	MBD3	1846833	1842265	9606.ENSP00000283131	9606.ENSP00000156825	0	0	0	0	0	0.909	0	0.091	0.913
ERCC2	TAF1	1857962	1846471	9606.ENSP00000375809	9606.ENSP00000276072	0	0	0	0	0	0	0.9	0.174	0.913
ERCC3	TAF4	1846961	1844180	9606.ENSP00000285398	9606.ENSP00000252996	0	0	0	0	0	0	0.9	0.157	0.912
TAF6	ERCC2	1860193	1857962	9606.ENSP00000399982	9606.ENSP00000375809	0	0	0	0	0	0	0.9	0.165	0.912
JUN	ARID1A	1855436	1850249	9606.ENSP00000360266	9606.ENSP00000320485	0	0	0	0	0	0	0.9	0.16	0.912
PHKG2	GTF2H2	1862976	1846383	9606.ENSP00000455607	9606.ENSP00000274400	0	0	0	0	0	0	0.9	0.16	0.912
HNRNPD	MTA2	1849608	1846587	9606.ENSP00000313199	9606.ENSP00000278823	0	0	0	0	0	0.576	0	0.802	0.912
BIRC5	BCL10	1848314	1846181	9606.ENSP00000301633	9606.ENSP00000271015	0	0	0	0	0	0	0.9	0.16	0.912
HDAC2	SMC3	1861837	1854200	9606.ENSP00000430432	9606.ENSP00000354720	0	0	0	0	0	0.7	0	0.72	0.912
TAF6	CCNH	1860193	1844473	9606.ENSP00000399982	9606.ENSP00000256897	0	0	0	0	0	0	0.9	0.156	0.912
RBBP4	CCNB2	1855919	1847117	9606.ENSP00000362592	9606.ENSP00000288207	0	0	0	0	0	0	0.9	0.165	0.912
CCR3	APP	1862185	1846936	9606.ENSP00000441600	9606.ENSP00000284981	0	0	0	0	0	0	0.9	0.163	0.912
TAF7	TAF4B	1849570	1846067	9606.ENSP00000312709	9606.ENSP00000269142	0	0	0	0	0	0.722	0.36	0.549	0.912
TAF5	ERCC3	1855115	1846961	9606.ENSP00000358854	9606.ENSP00000285398	0	0	0	0	0	0	0.9	0.16	0.912
GRIN2A	GRIN2D	1851485	1845322	9606.ENSP00000332549	9606.ENSP00000263269	0	0	0	0.921	0	0.098	0.9	0.914	0.912
ERCC2	UBTF	1857962	1848435	9606.ENSP00000375809	9606.ENSP00000302640	0	0	0	0	0	0	0.9	0.16	0.912
MYC	NR2F1	1856789	1850774	9606.ENSP00000367207	9606.ENSP00000325819	0	0	0	0	0	0	0.9	0.158	0.912
SF3B1	HNRNPU	1851836	1846836	9606.ENSP00000335321	9606.ENSP00000283179	0	0	0	0	0	0	0.9	0.159	0.912
SIN3A	GATAD2A	1854005	1853731	9606.ENSP00000353622	9606.ENSP00000351552	0	0	0	0	0	0.084	0.9	0.117	0.912
COBRA1	MNAT1	1852223	1844871	9606.ENSP00000339495	9606.ENSP00000261245	0	0	0	0	0	0	0.9	0.159	0.912
TAF6	RUVBL1	1860193	1850035	9606.ENSP00000399982	9606.ENSP00000318297	0	0	0	0	0	0	0.9	0.159	0.912
HNRNPH1	SF3B3	1853404	1848773	9606.ENSP00000349168	9606.ENSP00000305790	0	0	0	0	0	0	0.9	0.165	0.912
RELA	DDX1	1858923	1843337	9606.ENSP00000384273	9606.ENSP00000233084	0	0	0	0	0	0.576	0	0.802	0.912
BRCA1	LMNB1	1861387	1844893	9606.ENSP00000418960	9606.ENSP00000261366	0	0	0	0	0	0	0.9	0.159	0.912
AATF	FBL	1843020	1842861	9606.ENSP00000225402	9606.ENSP00000221801	0	0	0	0	0	0.848	0	0.446	0.912
SDC4	LRP1	1855743	1843653	9606.ENSP00000361818	9606.ENSP00000243077	0	0	0	0	0	0	0.9	0.16	0.912
RBBP4	TBP	1855919	1843249	9606.ENSP00000362592	9606.ENSP00000230354	0	0	0	0	0	0	0.9	0.164	0.912
NFATC2	TAF9	1858353	1842675	9606.ENSP00000379330	9606.ENSP00000217893	0	0	0	0	0	0.567	0	0.805	0.912
CTDP1	ERCC3	1848076	1846961	9606.ENSP00000299543	9606.ENSP00000285398	0	0	0	0	0	0	0.9	0.159	0.912
YBX1	POLR2B	1855704	1849572	9606.ENSP00000361626	9606.ENSP00000312735	0	0	0	0	0	0	0.9	0.161	0.912
EP300	MED6	1845316	1844426	9606.ENSP00000263253	9606.ENSP00000256379	0	0	0	0	0	0.097	0.9	0.111	0.912
BRCA1	CCNB1	1861387	1844435	9606.ENSP00000418960	9606.ENSP00000256442	0	0	0	0	0	0.807	0	0.567	0.912
HNRNPF	SF3B3	1852109	1848773	9606.ENSP00000338477	9606.ENSP00000305790	0	0	0	0	0	0	0.9	0.156	0.912
AHCTF1	BIRC5	1854384	1848314	9606.ENSP00000355465	9606.ENSP00000301633	0	0	0	0	0	0	0.9	0.156	0.912
ALYREF	SF3B1	1861534	1851836	9606.ENSP00000421592	9606.ENSP00000335321	0	0	0	0	0	0	0.9	0.149	0.911
HIST3H3	RUVBL1	1854433	1850035	9606.ENSP00000355657	9606.ENSP00000318297	0	0	0	0	0	0.155	0.9	0	0.911
HNRNPK	CBX4	1856467	1846093	9606.ENSP00000365439	9606.ENSP00000269397	0	0	0	0	0	0.566	0	0.804	0.911
HNRNPM	POLR2A	1850730	1849743	9606.ENSP00000325376	9606.ENSP00000314949	0	0	0	0	0	0.149	0.9	0	0.911
PES1	NSA2	1853086	1847792	9606.ENSP00000346725	9606.ENSP00000296802	0	0	0	0	0	0.865	0	0.372	0.911
TBL3	NOP58	1862919	1845519	9606.ENSP00000454836	9606.ENSP00000264279	0	0	0	0	0	0.83	0	0.499	0.911
ERCC2	CTDP1	1857962	1848076	9606.ENSP00000375809	9606.ENSP00000299543	0	0	0	0	0	0	0.9	0.152	0.911
SMC3	PPP1CC	1854200	1851808	9606.ENSP00000354720	9606.ENSP00000335084	0	0	0	0	0	0.155	0.9	0	0.911
PARP1	YY1	1854450	1845097	9606.ENSP00000355759	9606.ENSP00000262238	0	0	0	0	0	0.572	0	0.8	0.911
NR2F2	CEBPB	1858165	1848728	9606.ENSP00000377721	9606.ENSP00000305422	0	0	0	0	0	0	0.9	0.152	0.911
NAP1L4	EIF3A	1857242	1854958	9606.ENSP00000369915	9606.ENSP00000358140	0	0	0	0	0	0.911	0	0	0.911
POLR2A	HNRNPD	1849743	1849608	9606.ENSP00000314949	9606.ENSP00000313199	0	0	0	0	0	0.149	0.9	0	0.911
HDAC1	ERCC3	1855935	1846961	9606.ENSP00000362649	9606.ENSP00000285398	0	0	0	0	0	0	0.9	0.146	0.911
POLR2A	IRF1	1849743	1843757	9606.ENSP00000314949	9606.ENSP00000245414	0	0	0	0	0	0.149	0.9	0	0.911
GRIN2C	GRIN2B	1847389	1846639	9606.ENSP00000293190	9606.ENSP00000279593	0	0	0	0.933	0	0.098	0.9	0.914	0.911
PPP1CA	EIF2AK2	1850792	1843335	9606.ENSP00000326031	9606.ENSP00000233057	0	0	0	0	0	0.576	0.8	0	0.911
GTF2H1	TAF4	1845828	1844180	9606.ENSP00000265963	9606.ENSP00000252996	0	0	0	0	0	0	0.9	0.146	0.911
CCR3	CXCR4	1862185	1859216	9606.ENSP00000441600	9606.ENSP00000386884	0	0	0	0.837	0	0	0.9	0.702	0.911
SDC4	ITGAV	1855743	1844842	9606.ENSP00000361818	9606.ENSP00000261023	0	0	0	0	0	0	0.9	0.139	0.91
SIN3A	RBL2	1854005	1845071	9606.ENSP00000353622	9606.ENSP00000262133	0	0	0	0	0	0	0.9	0.138	0.91
JUN	SDC2	1855436	1848909	9606.ENSP00000360266	9606.ENSP00000307046	0	0	0	0	0	0	0.9	0.144	0.91
TAF11	MNAT1	1854176	1844871	9606.ENSP00000354633	9606.ENSP00000261245	0	0	0	0	0	0	0.9	0.144	0.91
YBX1	POLR2A	1855704	1849743	9606.ENSP00000361626	9606.ENSP00000314949	0	0	0	0	0	0	0.9	0.137	0.91
NPM1	SMARCA5	1847808	1846833	9606.ENSP00000296930	9606.ENSP00000283131	0	0	0	0	0	0	0.9	0.138	0.91
BRCA1	CBX4	1861387	1846093	9606.ENSP00000418960	9606.ENSP00000269397	0	0	0	0	0	0	0.9	0.137	0.91
RUVBL2	TAF4	1864926	1844180	9606.ENSP00000473172	9606.ENSP00000252996	0	0	0	0	0	0	0.9	0.145	0.91
MAX	CDK2	1853721	1845906	9606.ENSP00000351490	9606.ENSP00000266970	0	0	0	0	0	0	0.9	0.143	0.91
PLK1	NUP85	1848135	1843765	9606.ENSP00000300093	9606.ENSP00000245544	0	0	0	0	0	0	0.9	0.138	0.91
TAF5	GTF2H1	1855115	1845828	9606.ENSP00000358854	9606.ENSP00000265963	0	0	0	0	0	0	0.9	0.14	0.91
TAF4B	TAF4	1846067	1844180	9606.ENSP00000269142	9606.ENSP00000252996	0	0	0	0.78	0	0	0.9	0.515	0.91
UBTF	CCNH	1848435	1844473	9606.ENSP00000302640	9606.ENSP00000256897	0	0	0	0	0	0	0.9	0.142	0.91
ALYREF	POLR2B	1861534	1849572	9606.ENSP00000421592	9606.ENSP00000312735	0	0	0	0	0	0.096	0.9	0.09	0.91
POLR2A	TAF4B	1849743	1846067	9606.ENSP00000314949	9606.ENSP00000269142	0	0	0	0	0	0	0.9	0.139	0.91
ERCC3	TAF12	1846961	1845448	9606.ENSP00000285398	9606.ENSP00000263974	0	0	0	0	0	0	0.9	0.144	0.91
ERCC2	SSRP1	1857962	1846565	9606.ENSP00000375809	9606.ENSP00000278412	0	0	0	0	0	0	0.9	0.128	0.909
HIST2H4A	HIST1H3A	1854969	1853568	9606.ENSP00000358162	9606.ENSP00000350275	0	0	0	0	0	0.685	0	0.724	0.909
REL	EP300	1847519	1845316	9606.ENSP00000295025	9606.ENSP00000263253	0	0	0	0	0	0.606	0	0.779	0.909
POLR2B	MNAT1	1849572	1844871	9606.ENSP00000312735	9606.ENSP00000261245	0	0	0	0	0	0	0.9	0.129	0.909
[truncated: 7,079 more rows]
