# Supplementary figures and images for: Identification of HIV-1 Tat-Associated Proteins Contributing to HIV-1 Transcription and Latency
Source: MDPI journal article supplement (doi:10.3390/v9040067), 2017-04-01

# Figure S1

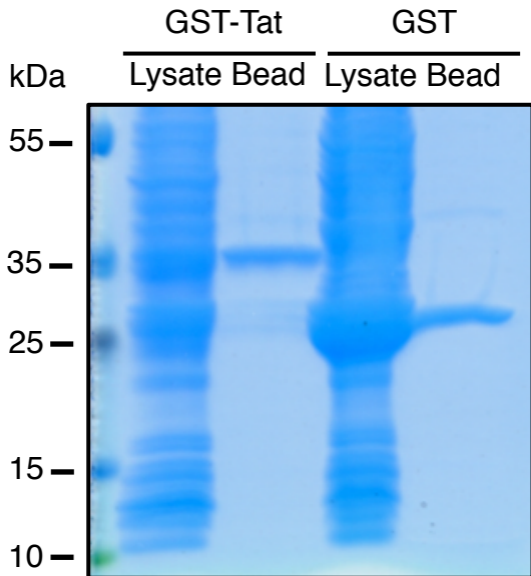

## Figure S2

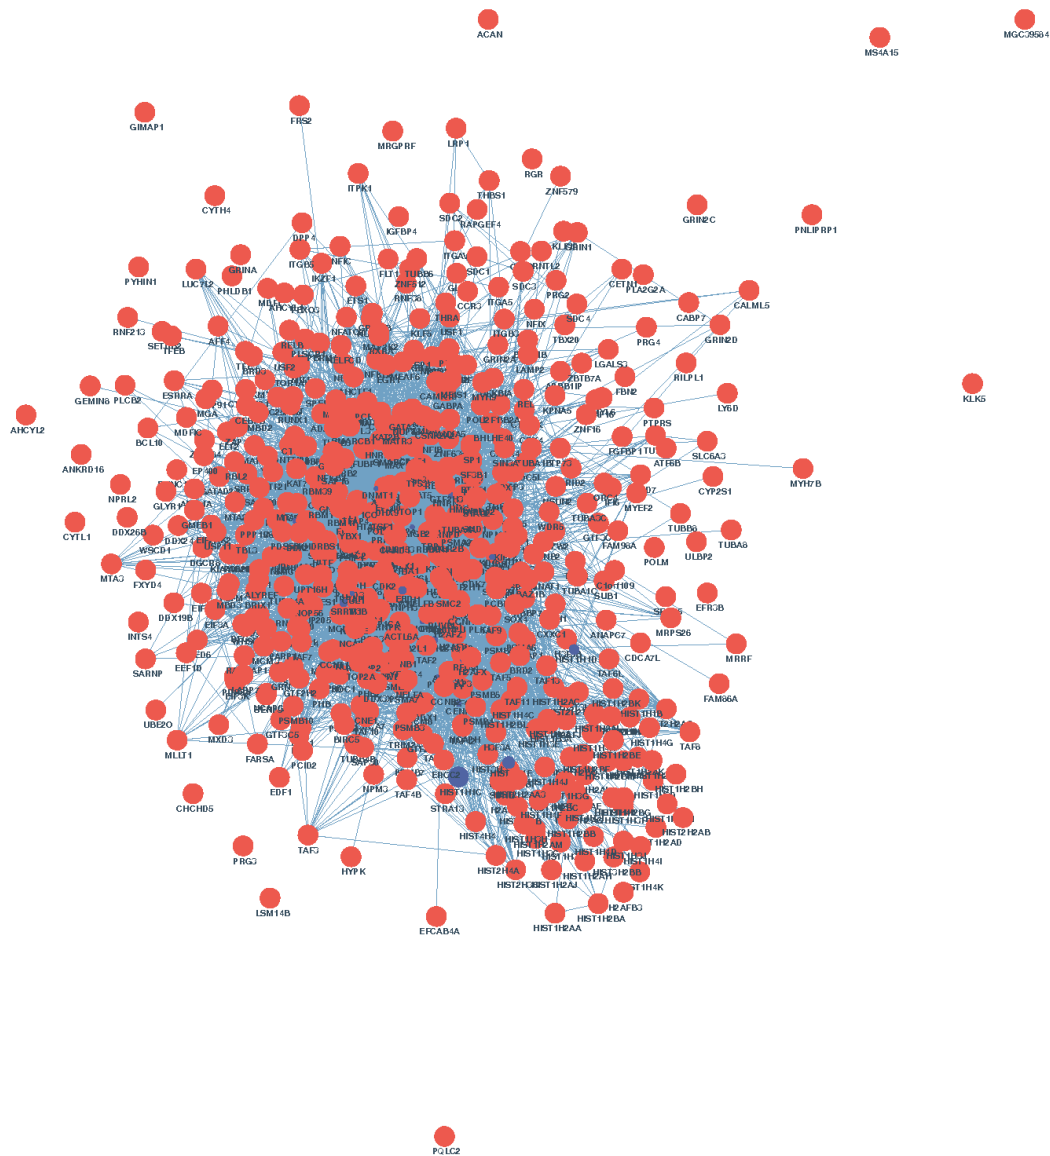

**Figure S3**

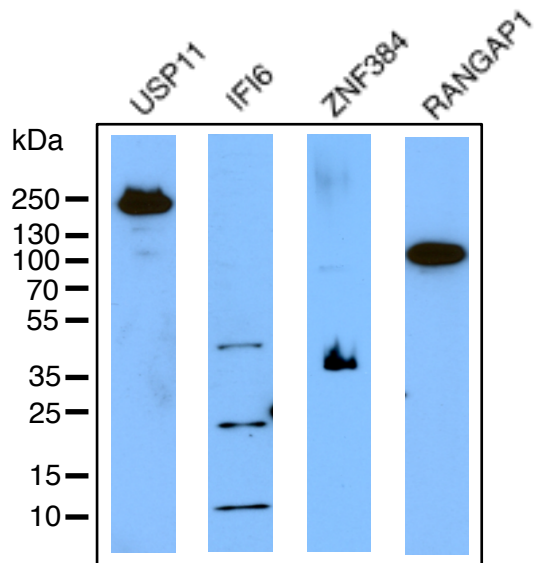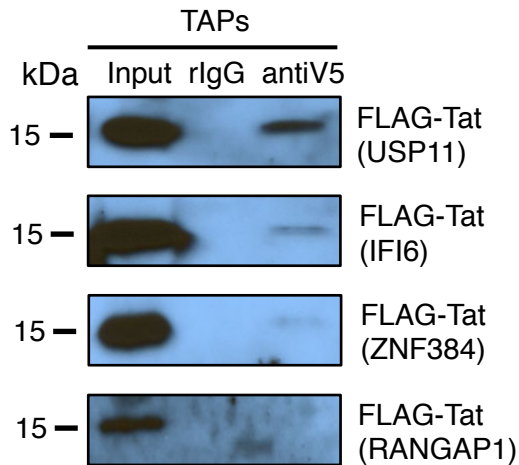

**Figure S4**

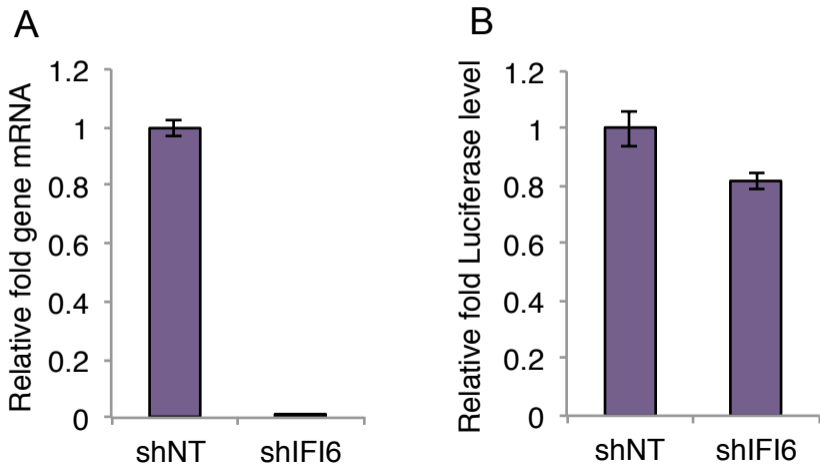

Supplement: s1 [file s1]
